# Supplementary material for: C–H fluorination promoted by pyridine N-oxyl radicals
Source: Royal Society of Chemistry journal article supplement (doi:10.1039/d4gc02247e), 2024-01-01
Supplement: d4gc02247e1.pdf [file d4gc02247e1.pdf]

# C-H Fluorination Promoted by Pyridine *N*-Oxyl Radical

Tianyu Zeng,<sup>‡a</sup> Chaoqun Huang,<sup>‡b</sup> Yang Zhang,<sup>\*a</sup> Yunzi Luo<sup>\*b</sup> and Dawen Niu<sup>\*a</sup>

## Table of Contents

|                                                                    |            |
|--------------------------------------------------------------------|------------|
| <b>1. General Information</b>                                      | <b>S1</b>  |
| <b>2. General Reaction Procedure</b>                               | <b>S2</b>  |
| <b>3. Condition Optimization</b>                                   | <b>S3</b>  |
| <b>4. Procedures for the synthesis of pyridine <i>N</i>-oxides</b> | <b>S4</b>  |
| <b>5. Characterization Data for pyridine <i>N</i>-oxides</b>       | <b>S5</b>  |
| <b>6. Mechanistic Studies</b>                                      | <b>S7</b>  |
| <b>7. Characterization Data for Products</b>                       | <b>S9</b>  |
| <b>8. References</b>                                               | <b>S17</b> |
| <b>9. NMR Spectra</b>                                              | <b>S18</b> |

## 1. General Information

---

Flash chromatography was performed using silica gel purchased from Qingdao Haiyang. Mixtures of petroleum ether/ethyl acetate or dichloromethane/methanol were used as eluting solvents. AgF and Selectfluor were purchased from Energy Chemical and used as received. H<sub>2</sub>O and *tert*-butanol served as reaction solvents, purchased from Adamas, and used as received.

All new compounds were characterized by NMR spectroscopy and high-resolution mass spectroscopy (HRMS). NMR spectra were recorded on a Bruker AMX 400 spectrometer and calibrated using TMS or residual deuterated solvent as an internal reference [CDCl<sub>3</sub>: 7.26 ppm or 0.00 ppm (TMS) for <sup>1</sup>H NMR and 77.16 ppm for <sup>13</sup>C NMR]. The tabulated data were reported in ppm. HRMS spectra were recorded on a Waters Q-TOF Premier.

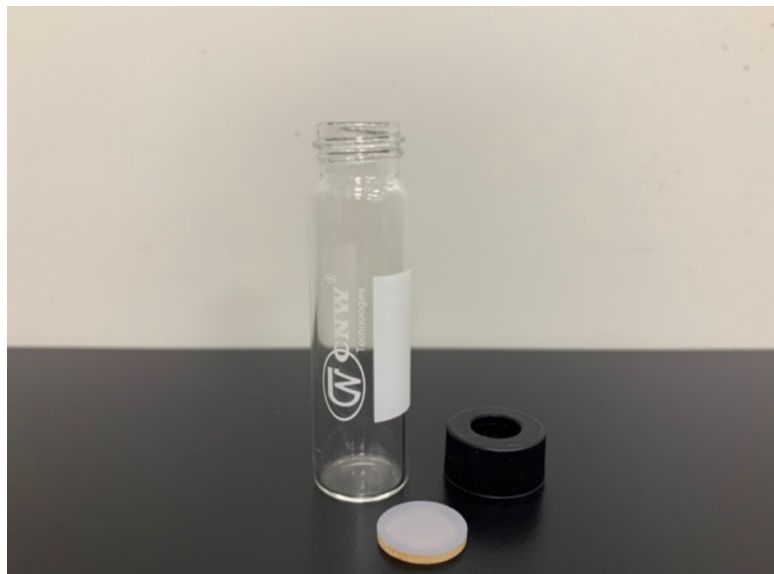

**Figure S1. A Picture of Reaction Vials Used in this Study.**

## 2. General Procedure for C-H Fluorination

---

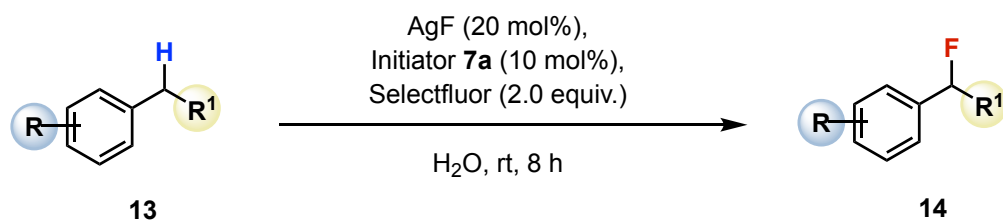

### General Procedure:

**13** (1.0 equiv.), pyridine *N*-oxides **7** as initiator (10 mol%), Selectfluor (2.0 equiv.) and AgF (20 mol %) were weighed into an 8 mL screw-capped vial equipped with a magnetic stir bar. The vial was loosely capped and transferred into a nitrogen-filled glovebox. The solvent was added to the vial. The vial was tightly sealed with a Teflon-lined cap and wrapped with black tape to stir for 8 hours. The reaction was extracted with ethyl acetate (2 mL x 3). The combined organic phases were dried over anhydrous Na<sub>2</sub>SO<sub>4</sub> and concentrated under reduced pressure. The residue was subsequently subjected to silica gel chromatograph to give desired product **14**.

### 3. Condition Optimization

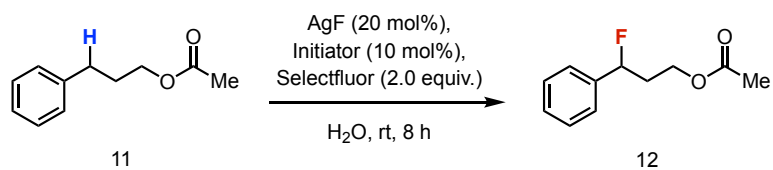

| Entry | Deviation from standard situation    | NMR Yield |
|-------|--------------------------------------|-----------|
| 1     | none                                 | 85%       |
| 2     | under air                            | n. d      |
| 3     | with natural light                   | 75%       |
| 4     | 2 h                                  | 34%       |
| 5     | KF instead of Selectfluor            | n. d      |
| 6     | KF instead of AgF                    | n. d      |
| 7     | add 2 equiv. KF                      | 77%       |
| 8     | <i>t</i> BuOH/H <sub>2</sub> O = 1:4 | 84%       |
| 9     | <i>t</i> BuOH/H <sub>2</sub> O = 1:1 | 75%       |
| 10    | MeCN                                 | n. d      |
| 11    | MeCN/H <sub>2</sub> O = 1:1          | 22%       |
| 12    | DCM                                  | n. d      |

[a] Reactions were performed under N<sub>2</sub> atmosphere with 11 (0.1 mmol), Selectfluor (2.0 equiv.), AgF (20 mol%) and Initiator (10 mol%) in H<sub>2</sub>O (1.0 mL) for 8 h. The reaction vial was encased with black tape to establish light-shielding conditions. NMR yields were determined by <sup>1</sup>H NMR spectroscopy with trimethyl benzene-1,3,5-tricarboxylate as an internal standard.

#### 4. Procedure for the Preparation of Pyridine *N*-oxides

---

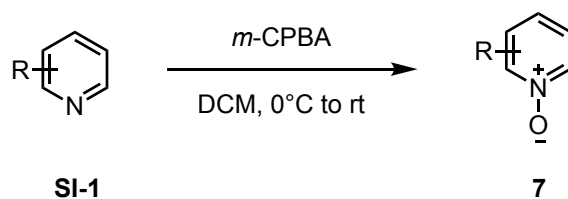

The *N*-oxides used in this study were prepared following the reported procedures as shown below. All the *N*-oxides are known compounds, and the characterization data for these compounds were presented below. Data align consistently with previous reports. <sup>[1]</sup>

##### Procedure for the Preparation of Pyridine *N*-oxides:

*m*-CPBA (1.1 equiv.) was added slowly to a solution of pyridine (1.0 equiv.) in DCM at 0 °C, and the reaction mixture was stirred for 12 h at room temperature. The reaction mixture was concentrated, and the residue was subjected to flash-column chromatography (SiO<sub>2</sub>, eluted with petroleum ether/ethyl acetate = 1:1 initially, then 5% MeOH in DCM, then 10% MeOH in DCM) to afford pyridine *N*-oxides.

## 5. Characterization Data for Pyridine *N*-oxides

---

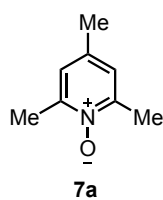

### 2,4,6-trimethylpyridine 1-oxide (7a)

Following the **Procedure for the Preparation of Pyridine *N*-oxides**, **SI-1a** (1.2 g, 10 mmol), *m*-CPBA (2.4 g, 12 mmol), and DCM (30 mL) were used. The residue was purified by silica gel column chromatography (hexane: ethyl acetate = 1:1 initially, then 5% MeOH in DCM, then 10% MeOH in DCM) to afford the product as yellow oil.

$^1\text{H NMR}$  (400 MHz, Chloroform-*d*)  $\delta$  6.96 (s, 2H), 2.51 (s, 6H), 2.28 (s, 3H).  $^{13}\text{C NMR}$  (101 MHz, Chloroform-*d*)  $\delta$  148.32, 136.39, 132.15, 129.43, 127.90, 124.86, 20.28, 18.27.

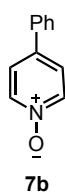

### 4-phenylpyridine 1-oxide (7b)

Following the **Procedure for the Preparation of Pyridine *N*-oxides**, **SI-1b** (1.6 g, 10 mmol), *m*-CPBA (2.4 g, 12 mmol), and DCM (30 mL) were used. The residue was purified by silica gel column chromatography to afford the product as brown solid.

$^1\text{H NMR}$  (400 MHz, Chloroform-*d*)  $\delta$  8.26 (d,  $J = 7.1$  Hz, 2H), 7.79–7.37 (m, 7H).

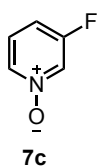

### 3-fluoropyridine 1-oxide (7c)

Following the **Procedure for the Preparation of Pyridine *N*-oxides**, **SI-1c** (970 mg, 10 mmol), *m*-CPBA (2.4 g, 12 mmol), and DCM (30 mL) were used. The residue was purified by silica gel column chromatography to afford the product as white solid.

$^1\text{H NMR}$  (400 MHz, Chloroform-*d*)  $\delta$  8.19 (dt,  $J = 4.3, 2.0$  Hz, 1H), 8.10 (d,  $J = 8.7$  Hz, 1H), 7.33–7.25 (m, 1H), 7.15–7.07 (m, 1H).

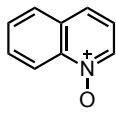

7d

### 3-(trifluoromethyl)pyridine 1-oxide (7d)

Following the **Procedure for the Preparation of Pyridine *N*-oxides**, **SI-1d** (1.3 g, 10 mmol), *m*-CPBA (2.4 g, 12 mmol), and DCM (30 mL) were used. The residue was purified by silica gel column chromatography (hexane: ethyl acetate =1:1) to afford the product as brown solid.

**<sup>1</sup>H NMR (400 MHz, Chloroform-*d*)**  $\delta$  8.75 (d,  $J = 8.8$  Hz, 1H), 8.54 (d,  $J = 6.0$  Hz, 1H), 7.87 (d,  $J = 8.2$  Hz, 1H), 7.82–7.70 (m, 2H), 7.64 (t,  $J = 7.6$  Hz, 1H), 7.33–7.25 (m, 1H).

## 6. Mechanistic Studies

### The Intramolecular Kinetic Isotope Effect Study

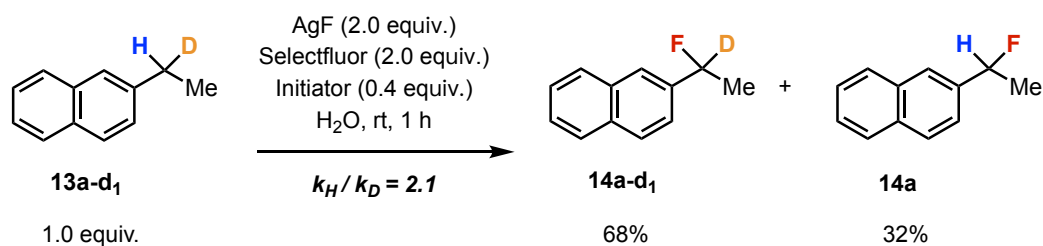

**13a-d<sub>1</sub>** (1.0 equiv.), **7a** (0.4 equiv.), Selectfluor (2.0 equiv.) and AgF (2.0 equiv.) were weighed into an 8 mL screw-capped vial containing a magnetic stir bar. The vial was loosely capped and transferred into a nitrogen-filled glovebox. H<sub>2</sub>O was added to the vial, and it was tightly sealed with a Teflon-lined cap. The entire setup was then wrapped with black tape and stirred for 1 hour. The ratio of **14a-d<sub>1</sub>** : **14a** was determined by <sup>19</sup>F NMR on a Bruker AMX 400 spectrometer instrument to be 68:32.

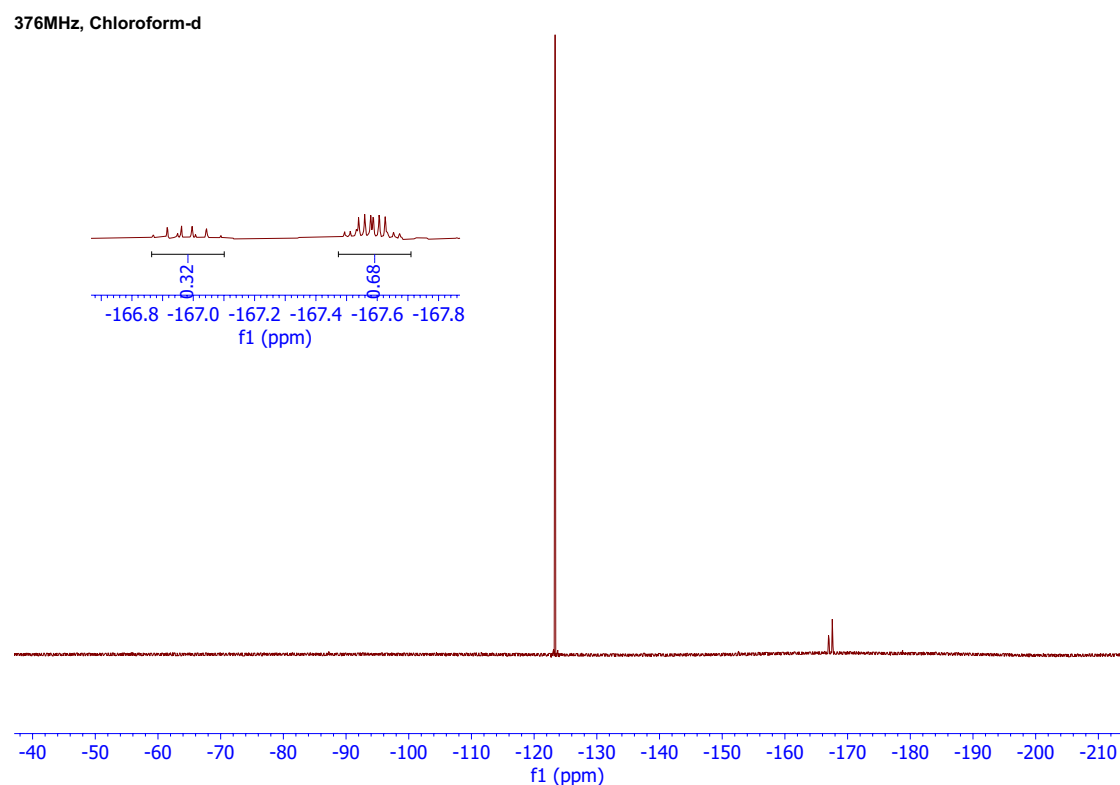

Figure S2. <sup>19</sup>F NMR of the Intramolecular Kinetic Isotope Effect Study.



## Radical Trap Experiments

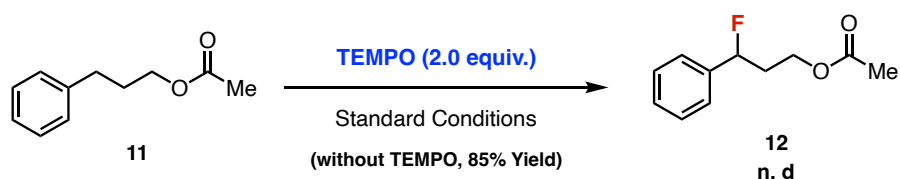

According to the **general procedure**, **11** (1.0 equiv.), pyridine *N*-oxides **7a** as initiator (10 mol%), Selectfluor (2.0 equiv.), AgF (20 mol %) and TEMPO(2.0 equiv.) were weighed into an 8 mL screw-capped vial equipped with a magnetic stir bar. The vial was loosely capped and transferred into a nitrogen-filled glovebox. The solvent was added to the vial. The vial was tightly sealed with a Teflon-lined cap and wrapped with black tape to stir for 8 hours. The reaction was extracted with ethyl acetate (2 mL x 3). The combined organic phases were dried over anhydrous Na<sub>2</sub>SO<sub>4</sub> and concentrated under reduced pressure. Fluorination product **12** was not detected.

## 7. Characterization Data for C-H Fluorination Products

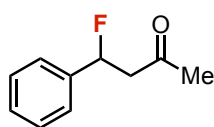

### 4-fluoro-4-phenylbutan-2-one (14a)

Following the **General Procedure**, **13a** (14.8 mg, 0.1 mmol), AgF (2.5 mg, 20 mol%), **7a** (1.4 mg, 10 mol%), and H<sub>2</sub>O (1 mL) were used. **14a** was obtained as yellow solid. (94% NMR yield). Once the residue was purified by silica gel column chromatography (hexane: EtOAc = 10:1), a 1:1 mixture of **14a** and trans-4-phenyl-3-buten-2-one (elimination product) was obtained when purified by silica gel chromatograph.<sup>[2]</sup>

**<sup>1</sup>H NMR (400 MHz, Chloroform-*d*)**  $\delta$  7.41–7.33 (m, 5H), 5.95 (ddd,  $J = 46.9, 8.8, 4.0$  Hz, 1H), 3.20 (ddd,  $J = 16.7, 14.7, 8.8$  Hz, 1H), 2.82 (ddd,  $J = 32.1, 16.7, 4.0$  Hz, 1H), 2.22 (s, 3H). **<sup>19</sup>F NMR (376MHz, Chloroform-*d*)**  $\delta$  -173.87 (d,  $J = 32.5$  Hz), -173.96 – -174.46 (m). Characterization data are consistent with previous reports.<sup>[3]</sup>

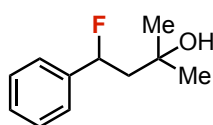

### 4-fluoro-2-methyl-4-phenylbutan-2-ol (14b)

Following the **General Procedure**, **13b** (16.4 mg, 0.1 mmol), AgF (2.5 mg, 20 mol%), **7a** (1.4 mg, 10 mol%), and H<sub>2</sub>O (1 mL) were used. The residue was purified by silica gel column chromatography (hexane: EtOAc = 10:1) to afford the product as colorless oil (12.7 mg, 70% yield).

**<sup>1</sup>H NMR (400 MHz, Chloroform-*d*)**  $\delta$  7.45–7.24 (m, 5H), 5.79 (ddd,  $J = 49.1, 10.2, 2.4$  Hz, 1H), 2.24 (td,  $J = 15.7, 10.2$  Hz, 1H), 2.01–1.67 (m, 2H), 1.36 (d,  $J = 6.2$  Hz, 6H). **<sup>13</sup>C NMR (101 MHz, Chloroform-*d*)**  $\delta$  139.67, 139.47, 127.53, 127.49, 127.38, 127.34, 124.45, 124.39, 92.50, 92.48, 90.83, 90.81, 69.14, 49.30, 49.09, 29.73, 29.23. **<sup>19</sup>F NMR (376MHz, Chloroform-*d*)**  $\delta$  -173.31. Characterization data are consistent with previous reports.<sup>[4]</sup>

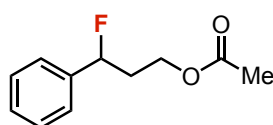

### 3-fluoro-3-phenylpropyl acetate (14c)

Following the **General Procedure**, **13c** (17.8 mg, 0.1 mmol), AgF (2.5 mg, 20 mol%), **7a** (1.4 mg, 10 mol%), and H<sub>2</sub>O (1 mL) were used. The residue was purified by silica gel column chromatography (hexane: EtOAc = 10:1) to afford the product as colorless oil (16.4mg, 84% yield).

**<sup>1</sup>H NMR (400 MHz, Chloroform-*d*)**  $\delta$  7.30 (m, 5H), 5.57 (ddd,  $J = 47.8, 8.8, 4.3$  Hz, 1H), 4.32–4.15 (m, 2H), 2.37–2.09 (m, 2H), 2.05 (s, 3H). **<sup>13</sup>C NMR (101 MHz, Chloroform-*d*)**  $\delta$  170.95, 139.58, 139.39, 128.61, 125.52, 125.45, 92.22, 90.59, 60.50, 60.45, 36.36, 36.12, 20.92. **<sup>19</sup>F NMR (376MHz, Chloroform-*d*)**  $\delta$  -177.39. Characterization data are consistent with previous reports. <sup>[3]</sup>

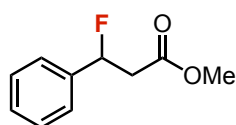

#### Methyl-3-fluoro-3-phenylpropanoate (14d)

Following the **General Procedure**, **13d** (16.4 mg, 0.1 mmol), AgF (2.5 mg, 20 mol%), **7a** (1.4 mg, 10 mol%), and H<sub>2</sub>O (1 mL) were used. The residue was purified by silica gel column chromatography (hexane: EtOAc = 10:1) to afford the product as colorless oil. (14.6mg, 80% yield).

**<sup>1</sup>H NMR (400 MHz, Chloroform-*d*)**  $\delta$  7.47–7.31 (m, 5H), 5.93 (ddd,  $J = 46.9, 9.2, 4.1$  Hz, 1H), 3.74 (s, 3H), 3.04 (ddd,  $J = 16.0, 13.5, 9.1$  Hz, 1H), 2.80 (ddd,  $J = 32.6, 16.0, 4.1$  Hz, 1H). **<sup>13</sup>C NMR (101 MHz, Chloroform-*d*)**  $\delta$  170.26, 170.22, 138.80, 138.61, 128.98, 128.96, 128.79, 125.71, 125.65, 91.55, 89.84, 52.15, 42.50, 42.23. **<sup>19</sup>F NMR (376MHz, Chloroform-*d*)**  $\delta$  -173.18. Characterization data are consistent with previous reports. <sup>[3]</sup>

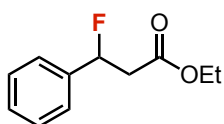

#### Ethyl-3-fluoro-3-phenylpropanoate (14e)

Following the **General Procedure**, **13e** (17.8 mg, 0.1 mmol), AgF (2.5 mg, 20 mol%), **7a** (1.4 mg, 10 mol%), and H<sub>2</sub>O (1 mL) were used. The residue was purified by silica gel column chromatography (hexane: EtOAc = 10:1) to afford the product as colorless oil (10.4mg, 53% yield).

**<sup>1</sup>H NMR (400 MHz, Chloroform-*d*)**  $\delta$  7.38 (d,  $J = 6.0$  Hz, 5H), 5.92 (ddd,  $J = 47.0, 9.1, 4.3$  Hz, 1H), 4.19 (qd,  $J = 7.2, 1.8$  Hz, 2H), 3.03 (ddd,  $J = 16.0, 13.6, 9.2$  Hz, 1H), 2.79 (ddd,  $J = 32.3, 16.0, 4.2$  Hz, 1H), 1.26 (t,  $J = 7.2$  Hz, 3H). **<sup>13</sup>C NMR (101 MHz, Chloroform-*d*)**  $\delta$  169.74, 138.88, 138.69, 128.93, 128.75, 125.75, 125.68, 91.62, 89.90, 61.08, 42.74, 42.47, 14.22. **<sup>19</sup>F NMR (376 MHz, Chloroform-*d*)**  $\delta$  -173.02 (ddd,  $J = 46.4, 32.4, 13.2$  Hz). Characterization data are consistent with previous reports. <sup>[5]</sup>

### 2-(1-fluoroethyl)naphthalene (14f)

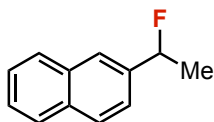

Following the **General Procedure, 13f** (15.6 mg, 0.1 mmol), AgF (6.3 mg, 50 mol%), **7a** (1.4 mg, 10 mol%), and H<sub>2</sub>O (1 mL) were used. The residue was purified by silica gel column chromatography (hexane) to afford the product as yellow oil (7.1mg, 41% yield).

**<sup>1</sup>H NMR (400 MHz, Chloroform-*d*)**  $\delta$  7.95–7.75 (m, 4H), 7.48 (ddd, *J* = 9.2, 5.8, 2.0 Hz, 3H), 5.79 (dq, *J* = 47.6, 6.4 Hz, 1H), 1.73 (dd, *J* = 23.8, 6.4 Hz, 3H). **<sup>13</sup>C NMR (101 MHz, Chloroform-*d*)**  $\delta$  137.89, 137.70, 132.14, 132.06, 127.35, 127.06, 126.69, 125.29, 125.17, 123.19, 123.11, 122.12, 122.06, 90.95, 89.28, 22.07, 21.81. **<sup>19</sup>F NMR (376 MHz, Chloroform-*d*)**  $\delta$  -166.99 (d, *J* = 2.2 Hz). Characterization data are consistent with previous reports.<sup>[6]</sup>

### 2-(fluoromethyl)naphthalene (14g)

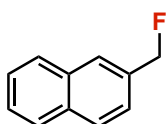

Following the **General Procedures, 13g** (14.2 mg, 0.1 mmol), AgF (6.3 mg, 50 mol%), **7a** (1.4 mg, 10 mol%), and H<sub>2</sub>O (1 mL) were used. The residue was purified by silica gel column chromatography (hexane) to afford the product as yellow oil (27% NMR yield).

**<sup>1</sup>H NMR (400 MHz, Chloroform-*d*)**  $\delta$  7.92–7.81 (m, 4H), 7.56–7.44 (m, 3H), 5.54 (d, *J* = 47.8 Hz, 2H). **<sup>13</sup>C NMR (101 MHz, Chloroform-*d*)**  $\delta$  133.80, 133.63, 133.47, 133.21, 128.60, 128.20, 127.87, 126.86, 126.79, 126.58, 126.50, 125.10, 85.71, 84.06. **<sup>19</sup>F NMR (376 MHz, Chloroform-*d*)**  $\delta$  -206.55, -206.62, -206.76, -206.82, -206.89, -207.03, -207.09. Characterization data are consistent with previous reports.<sup>[7]</sup>

### (1-fluoroethane-1,2-diyl)dibenzene (14h)

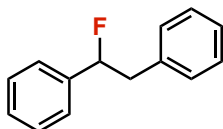

Following the **General Procedure, 13h** (18.2 mg, 0.1 mmol), AgF (12.1 mg, 1.0 equiv.), **7a** (1.4 mg, 10 mol%), and *t*BuOH/H<sub>2</sub>O = 1:1 (1 mL) were used. The residue was purified by silica gel column chromatography (hexane: EtOAc = 49:1) to afford the product as colorless oil. (7.8mg, 39% yield).

**<sup>1</sup>H NMR (400 MHz, Chloroform-*d*)**  $\delta$  7.38–7.20 (m, 8H), 7.22–7.15 (m, 2H), 5.61 (ddd, *J* = 47.3, 8.1, 4.8 Hz, 1H), 3.27 (ddd, *J* = 17.5, 14.2, 8.1 Hz, 1H), 3.10 (ddd, *J* =

28.5, 14.2, 4.8 Hz, 1H);  $^{13}\text{C}$  NMR (101 MHz, Chloroform-*d*)  $\delta$  138.86, 138.66, 135.68, 135.64, 128.49, 127.36, 127.35, 127.33, 125.67, 124.67, 124.60, 94.74, 94.71, 93.01, 92.98, 43.04, 42.80;  $^{19}\text{F}$  NMR (376 MHz, Chloroform-*d*)  $\delta$  -173.17. Characterization data are consistent with previous reports<sup>[8]</sup>

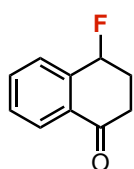

#### 4-fluoro-3,4-dihydronaphthalen-1(2H)-one (14i)

Following the **General Procedure**, **13i** (14.6 mg, 0.1 mmol), AgF (2.5 mg, 20 mol%), **7a** (1.4 mg, 10 mol%), and H<sub>2</sub>O (1 mL) were used. The residue was purified by silica gel column chromatography (hexane: EtOAc = 8:1) to afford the product as yellow oil (5.9 mg, 36% yield).

$^1\text{H}$  NMR (400 MHz, Chloroform-*d*)  $\delta$  8.07 (d,  $J$  = 7.8 Hz, 1H), 7.65 (t,  $J$  = 7.5 Hz, 1H), 7.59–7.47 (m, 2H), 5.74 (dt,  $J$  = 50.4, 5.1 Hz, 1H), 3.03–2.92 (m, 1H), 2.65 (dt,  $J$  = 17.3, 6.4 Hz, 1H), 2.55–2.41 (m, 2H).  $^{13}\text{C}$  NMR (101 MHz, Chloroform-*d*) 196.68, 140.33, 140.15, 134.24, 131.48, 129.80, 129.77, 128.16, 128.10, 127.22, 88.65, 86.94, 34.03, 33.96, 29.80, 29.45, 29.23,.  $^{19}\text{F}$  NMR (376 MHz, Chloroform-*d*)  $\delta$  -170.27 – -170.58 (m). Characterization data are consistent with previous reports.<sup>[9]</sup>

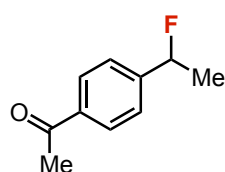

#### 1-(4-(1-fluoroethyl)phenyl)ethan-1-one (14j)

Following the **General Procedure**, **13j** (14.8 mg, 0.1 mmol), AgF (2.5 mg, 20 mol%), **7a** (1.4 mg, 10 mol%), and H<sub>2</sub>O (1 mL) were used. The residue was purified by silica gel column chromatography (hexane: EtOAc = 97:3) to afford the product as yellow oil. (13.4 mg, 81% yield).

$^1\text{H}$  NMR (400 MHz, Chloroform-*d*)  $\delta$  7.97 (d,  $J$  = 8.1 Hz, 2H), 7.44 (d,  $J$  = 8.1 Hz, 2H), 5.68 (dq,  $J$  = 47.6, 6.5 Hz, 1H), 2.61 (s, 3H), 1.65 (dd,  $J$  = 24.0, 6.5 Hz, 3H).  $^{13}\text{C}$  NMR (101 MHz, Chloroform-*d*)  $\delta$  197.84, 146.88, 146.68, 136.86, 128.71, 125.23, 125.15, 91.25, 89.56, 26.79, 23.23, 22.99.  $^{19}\text{F}$  NMR (376 MHz, Chloroform-*d*) -171.22, -170.88– -171.83 (m). Characterization data are consistent with previous reports. <sup>[2]</sup>

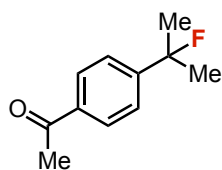

#### 1-(4-(2-fluoropropan-2-yl)phenyl)ethan-1-one (14k)

Following the **General Procedure**, **13k** (16.2mg, 0.1 mmol), AgF (2.5 mg, 20 mol%), **7a** (1.4 mg, 10 mol%), and H<sub>2</sub>O (1 mL) were used. The residue was purified by silica gel column chromatography (hexane: EtOAc = 97:3) to afford the product as yellow oil. (7.4 mg, 41% yield).

**<sup>1</sup>H NMR (400 MHz, Chloroform-*d*)**  $\delta$  7.95 (d,  $J$  = 8.2 Hz, 2H), 7.57–7.44 (m, 2H), 2.61 (s, 3H), 1.70 (d,  $J$  = 21.9 Hz, 6H). **<sup>19</sup>F NMR (376 MHz, Chloroform-*d*)**  $\delta$  -138.79, -138.84, -138.89, -138.94, -138.99, -139.04, -139.09. Characterization data are consistent with previous reports. <sup>[2]</sup>

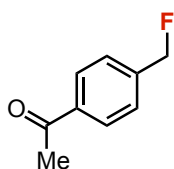

#### 1-(4-(fluoromethyl)phenyl)ethan-1-one (14l)

Following the **General Procedure**, **13l** (13.4 mg, 0.1 mmol), AgF (2.5 mg, 20 mol%), **7a** (1.4 mg, 10 mol%), and H<sub>2</sub>O (1 mL) were used. The residue was purified by silica gel column chromatography (hexane: EtOAc = 97:3) to afford the product as yellow oil. (9.3mg, 61% yield).

**<sup>1</sup>H NMR (400 MHz, Chloroform-*d*)**  $\delta$  8.04–7.87 (m, 2H), 7.45 (dd,  $J$  = 8.3, 1.6 Hz, 2H), 5.44 (d,  $J$  = 47.2 Hz, 2H), 2.61 (s, 3H). **<sup>13</sup>C NMR (101 MHz, Chloroform-*d*)**  $\delta$  197.76, 141.53, 141.36, 137.21, 137.18, 128.70, 126.90, 126.84, 84.56, 82.88, 26.76. **<sup>19</sup>F NMR (376 MHz, Chloroform-*d*)**  $\delta$  -212.86 (d,  $J$  = 3.4 Hz), -213.02, -213.06 (t,  $J$  = 3.4 Hz), -213.25 (d,  $J$  = 3.4 Hz). Characterization data are consistent with previous reports. <sup>[10]</sup>

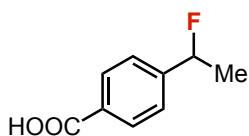

#### 4-(1-fluoroethyl)benzoic acid (14m)

Following the **General Procedure**, **13m** (15.0 mg, 0.1 mmol), AgF (2.5 mg, 20 mol%), **7a** (1.4 mg, 10 mol%), and H<sub>2</sub>O (1 mL) were used. The residue was purified by preparative TLC (hexane: EtOAc = 7:3) to afford the product as white solid. (41% NMR yield).

**<sup>1</sup>H NMR (400 MHz, Chloroform-*d*)**  $\delta$  8.13 (d,  $J$  = 7.9 Hz, 2H), 7.44 (s, 2H), 5.70 (dq,  $J$  = 47.4, 6.3 Hz, 1H), 1.66 (dd,  $J$  = 24.1, 6.5 Hz, 3H).  **$\delta$  <sup>19</sup>F NMR (376 MHz,**

**Chloroform-*d***)  $\delta$  -171.66 (d,  $J$  = 4.2 Hz). Characterization data are consistent with previous reports.<sup>[4]</sup>

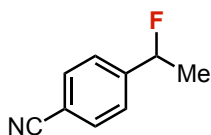

#### 4-(1-fluoroethyl)benzonitrile (14n)

Following the **General Procedure**, **13n** (13.1 mg, 0.1 mmol), AgF (2.5 mg, 20 mol%), **7b** (1.7 mg, 10 mol%), and H<sub>2</sub>O (1 mL) were used. The residue was purified by silica gel column chromatography (hexane: EtOAc = 20:1) to afford the product as yellow oil. (9.4mg, 63% yield).

<sup>1</sup>H NMR (400 MHz, Chloroform-*d*)  $\delta$  7.68 (d,  $J$  = 8.1 Hz, 2H), 7.45 (d,  $J$  = 8.1 Hz, 2H), 5.67 (dq,  $J$  = 47.4, 6.5 Hz, 1H), 1.64 (dd,  $J$  = 24.0, 6.4 Hz, 3H). <sup>13</sup>C NMR (101 MHz, Chloroform-*d*)  $\delta$  146.91, 146.71, 132.50, 125.68 (d,  $J$  = 7.8 Hz), 118.69, 112.06, 90.82, 89.12, 23.18, 22.94. <sup>19</sup>F NMR (376 MHz, Chloroform-*d*)  $\delta$  -172.67 (d,  $J$  = 2.8 Hz). Characterization data are consistent with previous reports. <sup>[2]</sup>

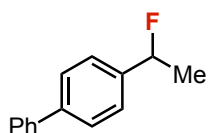

#### 4-(1-fluoroethyl)-1,1'-biphenyl (14o)

Following the **General Procedures**, **13o** (18.2 mg, 0.1 mmol), AgF (2.5 mg, 20 mol%), **7a** (1.4 mg, 10 mol%), and *t*BuOH/H<sub>2</sub>O = 1:1 (1 mL) were used. The residue was purified by silica gel column chromatography (hexane) to afford the product as white solid. (69% NMR yield).

<sup>1</sup>H NMR (400 MHz, Chloroform-*d*)  $\delta$  7.60 (dd,  $J$  = 8.0, 5.8 Hz, 4H), 7.44 (t,  $J$  = 7.9 Hz, 4H), 7.41–7.30 (m, 1H), 5.68 (dq,  $J$  = 47.7, 6.4 Hz, 1H), 1.69 (dd,  $J$  = 23.8, 6.4 Hz, 3H). <sup>19</sup>F NMR (376 MHz, Chloroform-*d*) -166.61 (dq,  $J$  = 15.2, 10.1 Hz). Characterization data are consistent with previous reports.<sup>[6]</sup>

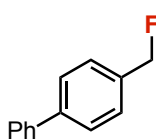

#### 4-(1-fluoroethyl)-1,1'-biphenyl (14p)

Following the **General Procedure**, **13p** (16.8 mg, 0.1 mmol), AgF (6.3 mg, 50 mol%), **7a** (1.4 mg, 10 mol%), and *t*BuOH/H<sub>2</sub>O=1:1 (1mL) were used. The residue was purified by silica gel column chromatography (hexane) to afford the product as white solid. (66% NMR yield).

**<sup>1</sup>H NMR (400 MHz, Chloroform-*d*)**  $\delta$  7.66–7.55 (m, 4H), 7.50–7.42 (m, 4H), 7.40–7.34 (m, 1H), 5.42 (d,  $J$  = 47.9 Hz, 2H). **<sup>19</sup>F NMR (376 MHz, Chloroform-*d*)**  $\delta$  -206.03 (d,  $J$  = 4.0 Hz), -206.23 (t,  $J$  = 3.8 Hz), -206.42 (d,  $J$  = 4.1 Hz). Characterization data are consistent with previous reports. <sup>[7]</sup>

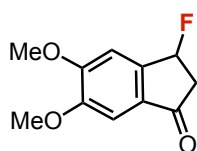

**3-fluoro-5,6-dimethoxy-2,3-dihydro-1*H*-inden-1-one (14q)**

Following the **General Procedure**, **13q** (19.2 mg, 0.1 mmol), AgF (6.3 mg, 50 mol%), **7a** (1.4 mg, 10 mol%), and H<sub>2</sub>O (1 mL) were used. The residue was purified by silica gel column chromatography (hexane: EtOAc = 8:1) to afford the product as white solid. (9.2mg, 44% yield).

**<sup>1</sup>H NMR (400 MHz, Chloroform-*d*)**  $\delta$  7.24–7.10 (m, 2H), 6.10 (ddd,  $J$  = 56.4, 6.4, 1.9 Hz, 1H), 4.01 (s, 3H), 3.95 (s, 3H), 3.10 (ddd,  $J$  = 18.3, 11.5, 6.4 Hz, 1H), 2.85 (ddd,  $J$  = 23.2, 18.9, 2.0 Hz, 1H). **<sup>13</sup>C NMR (101 MHz, Chloroform-*d*)**  $\delta$  198.78, 154.80, 154.77, 150.90, 144.32, 144.14, 129.39, 129.37, 106.12, 102.63, 87.90, 86.14, 55.44, 55.40, 55.27, 55.23, 43.23, 43.02. **<sup>19</sup>F NMR (376 MHz, Chloroform-*d*)**  $\delta$  -167.69. **HRMS (ESI)** calculated for C<sub>11</sub>H<sub>12</sub>FO<sub>3</sub><sup>+</sup> [M+H]<sup>+</sup>  $m/z$  211.0765, found 211.0766.

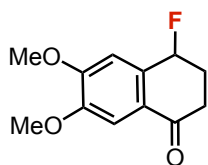

**4-fluoro-6,7-dimethoxy-3,4-dihydronaphthalen-1(2*H*)-one (14r)**

Following the **General Procedure**, **13r** (20.6 mg, 0.1 mmol), AgF (6.3 mg, 50 mol%), **7a** (1.4 mg, 10 mol%), and H<sub>2</sub>O (1 mL) were used. The residue was purified by silica gel column chromatography (hexane: EtOAc = 8:1) to afford the product as yellow solid (8.9mg, 40% yield).

**<sup>1</sup>H NMR (400 MHz, Chloroform-*d*)**  $\delta$  7.52 (s, 1H), 6.98 (s, 1H), 5.84–5.57 (m, 1H), 3.97 (d,  $J$  = 16.6 Hz, 6H), 3.01–2.80 (m, 1H), 2.61 (dt,  $J$  = 10.3, 5.7 Hz, 1H), 2.52–2.33 (m, 2H). **<sup>13</sup>C NMR (101 MHz, Chloroform-*d*)**  $\delta$  195.59, 154.01, 135.09, 134.92, 125.19, 109.53, 109.47, 108.44, 88.75, 87.04, 56.36, 56.24, 33.72, 33.65, 29.84, 29.62. **<sup>19</sup>F NMR (376 MHz, Chloroform-*d*)**  $\delta$  -169.30– -169.55 (m). Characterization data are consistent with previous reports. <sup>[11]</sup>



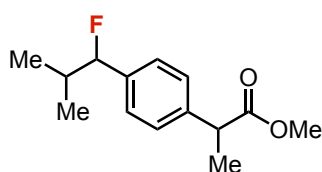

**Methyl-2-(4-(1-fluoro-2-methylpropyl)-phenyl)propanoate (14s)**

Following the **General Procedure**, **13s** (22.0 mg, 0.1 mmol), AgF (6.3 mg, 50 mol %), **7a** (1.4 mg, 10 mol %), and *t*BuOH/H<sub>2</sub>O = 1:1 (1 mL) were used. The residue was purified by silica gel column chromatography (hexane: EtOAc = 10:1) to afford the product as colorless oil (16.7mg, 70% yield).

**<sup>1</sup>H NMR (400 MHz, Chloroform-*d*)** δ 7.37–7.13 (m, 4H), 5.08 (dd, *J* = 47.0, 6.8 Hz, 1H), 3.73 (q, *J* = 7.2 Hz, 1H), 3.66 (s, 3H), 2.09 (ddt, *J* = 23.7, 13.6, 6.8 Hz, 1H), 1.50 (d, *J* = 7.2 Hz, 2H), 1.02 (d, *J* = 7.7 Hz, 2H), 0.85 (d, *J* = 6.8 Hz, 3H). **<sup>13</sup>C NMR (101 MHz, Chloroform-*d*)** δ 173.88, 139.33, 139.31, 137.37, 137.16, 129.61, 126.30, 125.48, 125.41, 98.93, 98.91, 97.21, 97.18, 51.07, 51.04, 51.01, 50.98, 44.14, 44.11, 33.34, 33.12, 17.55, 17.35, 17.29, 16.54, 16.49. **<sup>19</sup>F NMR (376 MHz, Chloroform-*d*)** -179.64 (d, *J* = 8.4 Hz). Characterization data are consistent with previous reports. <sup>[11]</sup>

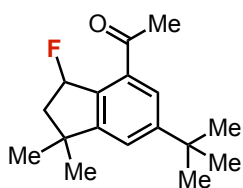

**1-(6-(tert-butyl)-3-fluoro-1,1-dimethyl-2,3-dihydro-1H-inden-4-yl)ethan-1-one (14t)**

Following the **General Procedure**, **13t** (24.4 mg, 0.1 mmol), AgF (6.3 mg, 50 mol%), **7a** (1.4 mg, 10 mol%), and *t*BuOH/H<sub>2</sub>O = 1:1 (1 mL) were used. The residue was purified by silica gel column chromatography (hexane: EtOAc = 9:1) to afford the product as white solid. (11.0mg, 42% yield)<sup>[11]</sup>

**<sup>1</sup>H NMR (400 MHz, Chloroform-*d*)** δ 7.76 (d, *J* = 1.8 Hz, 1H), 7.43 (t, *J* = 1.6 Hz, 1H), 6.44 (ddd, *J* = 54.0, 6.1, 1.5 Hz, 1H), 2.66 (s, 3H), 2.38–2.08 (m, 2H), 1.36 (d, *J* = 13.6 Hz, 15H). **<sup>13</sup>C NMR (101 MHz, Chloroform-*d*)** δ 198.64, 154.82, 154.77, 153.15, 153.11, 134.12, 133.96, 133.87, 124.56, 124.53, 122.55, 122.52, 93.56, 91.85, 47.46, 47.24, 41.70, 41.68, 34.07, 30.48, 30.34, 28.00, 27.95, 27.61, 27.57. **<sup>19</sup>F NMR (376 MHz, Chloroform-*d*)** δ -158.61. Characterization data are consistent with previous reports. <sup>[11]</sup>

## 8. Reference

---

- [1] (a) F. Yang, X. Zhang, F. Li, Z. Wang, L. Wang, *Green Chem.*, **2016**, *18*, 3518-3521; (b) K. D. Kim, J. H. Lee, *Org. Lett.*, **2018**, *20*, 7712-7716; (c) J. Schießl, P. M. Stein, J. Stirn, K. Emler, M. Rudolph, F. Rominger, A. S. K. Hashmi, *Adv. Synth. Catal.*, **2019**, *361*, 725-738.
- [2] J.-B. Xia, C. Zhu, C. Chen, *J. Am. Chem. Soc.*, **2013**, *135*, 17494-17500.
- [3] S. Bloom, C. R. Pitts, R. Woltornist, A. Griswold, M. G. Holl, T. Lectka, *Org. Lett.*, **2013**, *15*, 1722-1724.
- [4] D. Cantillo, O. de Frutos, J. A. Rincón, C. Mateos, C. O. Kappe, *J. Org. Chem.*, **2014**, *79*, 8486-8490.
- [5] A. Mandal, J. Jang, B. Yang, H. Kim, K. Shin, *Org. Lett.*, **2023**, *25*, 195-199.
- [6] E. Emer, L. Pfeifer, J. M. Brown, V. Gouverneur, *Angew. Chem. Int. Ed.*, **2014**, *53*, 4181-4185.
- [7] Y.-M. Su, G.-S. Feng, Z.-Y. Wang, Q. Lan, X.-S. Wang, *Angew. Chem. Int. Ed.*, **2015**, *54*, 6003-6007.
- [8] J. Sheng, H.-Q. Ni, H.-R. Zhang, K.-F. Zhang, Y.-N. Wang, X.-S. Wang, *Angew. Chem. Int. Ed.*, **2018**, *57*, 7634-7639.
- [9] V. Dinoiu, T. Fukuhara, K. Miura, N. Yoneda, *J. Fluorine Chem.*, **2003**, *121*, 227-231.
- [10] L. An, Y.-L. Xiao, Q.-Q. Min, X. Zhang, *Angew. Chem. Int. Ed.*, **2015**, *54*, 9079-9083.
- [11] W. Liu, J. T. Groves, *Angew. Chem. Int. Ed.*, **2013**, *52*, 6024-6027.

## 9. NMR Spectra

400 HMz, Chloroform-d

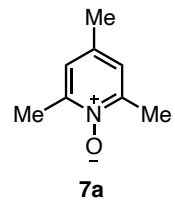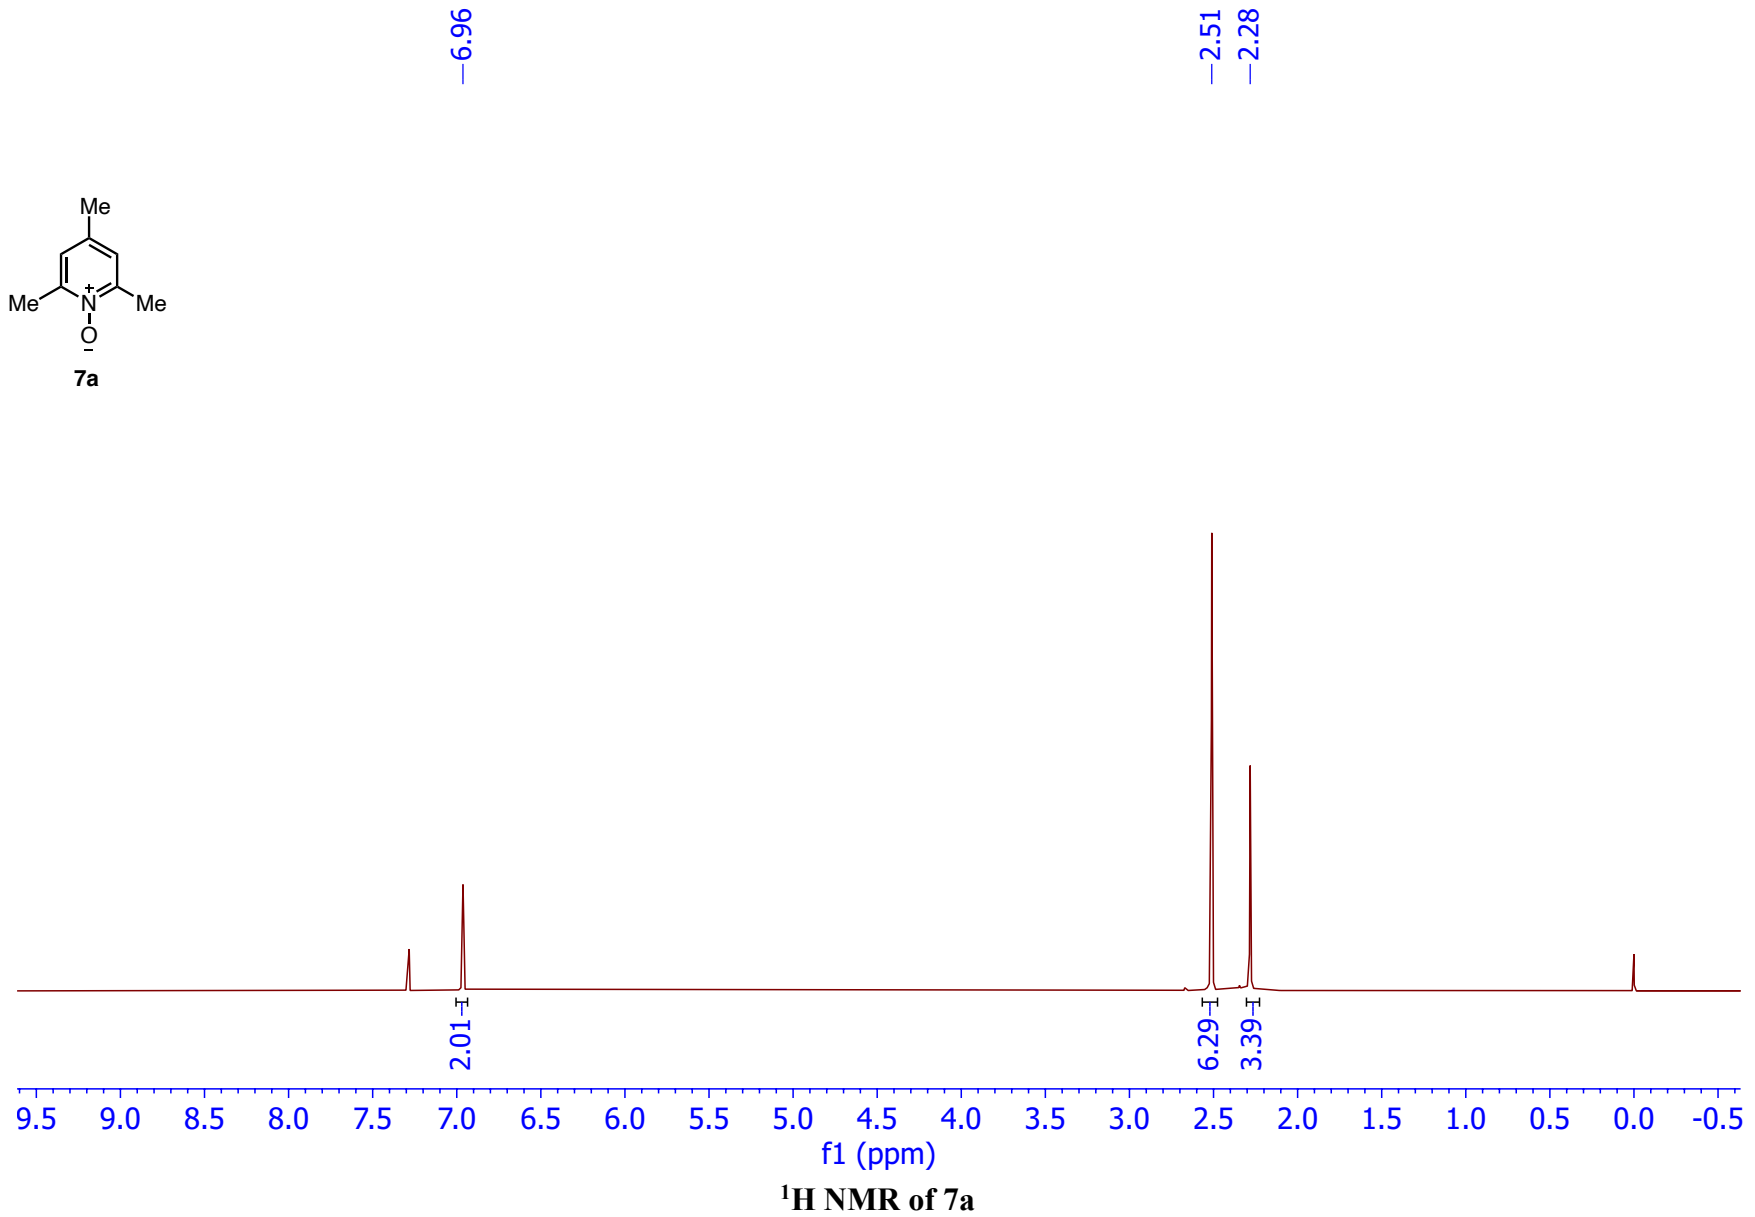

101 MHz, Chloroform-d

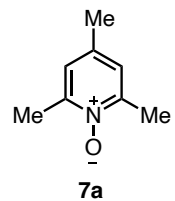

-148.32

-136.39

-124.86

20.28  
18.27

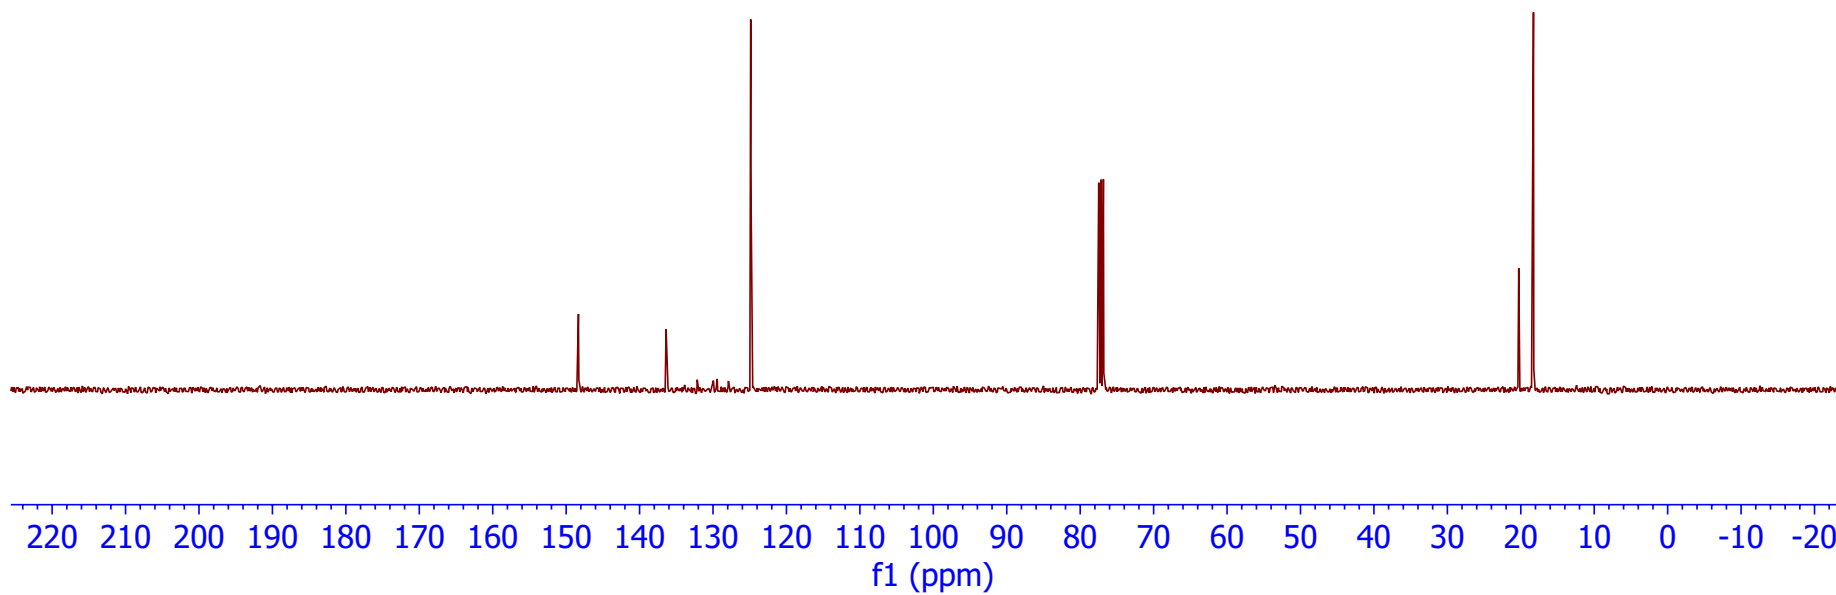

400 HMz, Chloroform-d

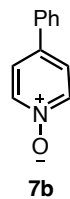

8.27  
8.25  
7.57  
7.56  
7.52  
7.50  
7.47  
7.45  
7.44  
7.42

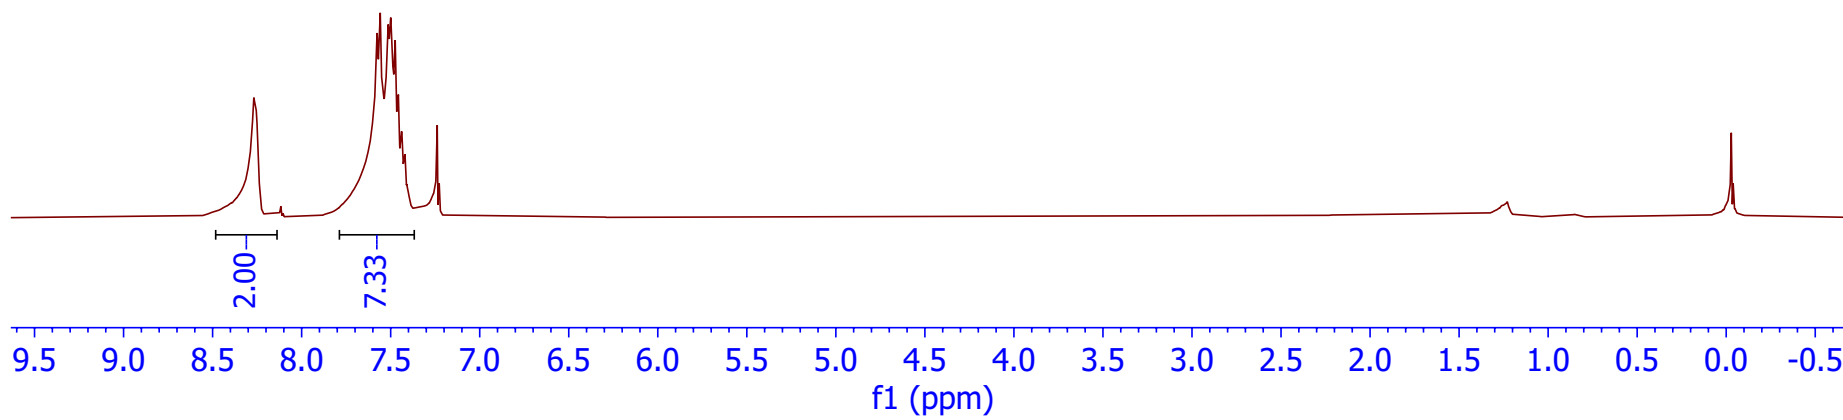

<sup>1</sup>H NMR of 7b

400 HMz, Chloroform-d

8.20  
8.19  
8.19  
8.18  
8.18  
8.11  
8.09  
7.31  
7.29  
7.27  
7.25  
7.13  
7.12  
7.11  
7.10  
7.09  
7.08

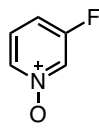

7c

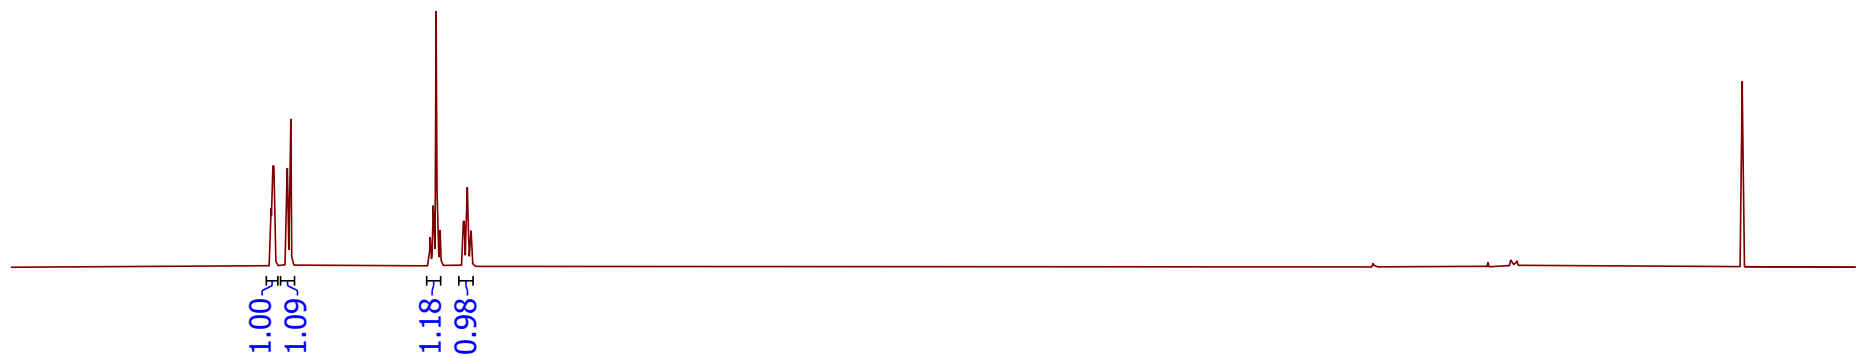

9.5 9.0 8.5 8.0 7.5 7.0 6.5 6.0 5.5 5.0 4.5 4.0 3.5 3.0 2.5 2.0 1.5 1.0 0.5 0.0 -0.5

f1 (ppm)  
<sup>1</sup>H NMR of 7c

400 HMz, Chloroform-d

8.76  
8.74  
8.55  
8.53  
7.88  
7.86  
7.78  
7.76  
7.76  
7.74  
7.74  
7.66  
7.64  
7.62  
7.32  
7.30  
7.28

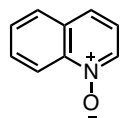

7d

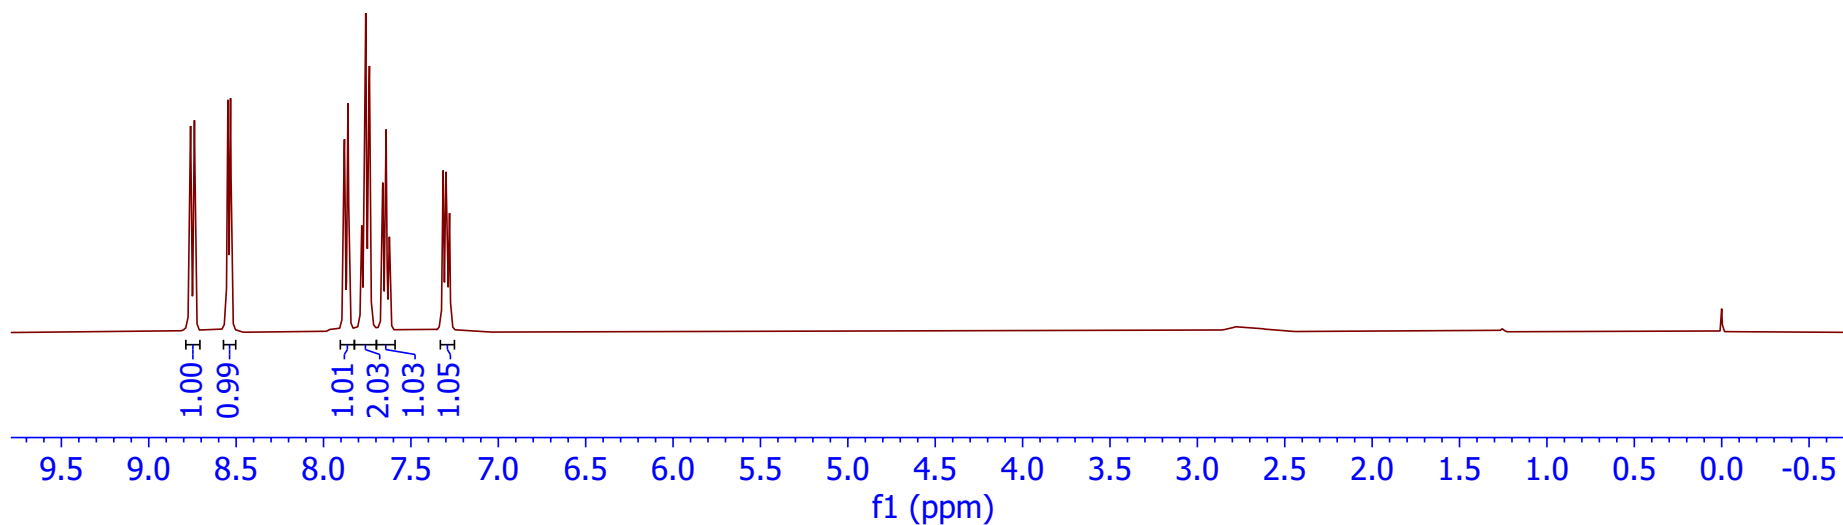

<sup>1</sup>H NMR of 7d

400 HMz, Chloroform-d

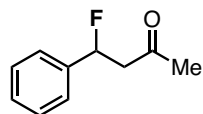

14a

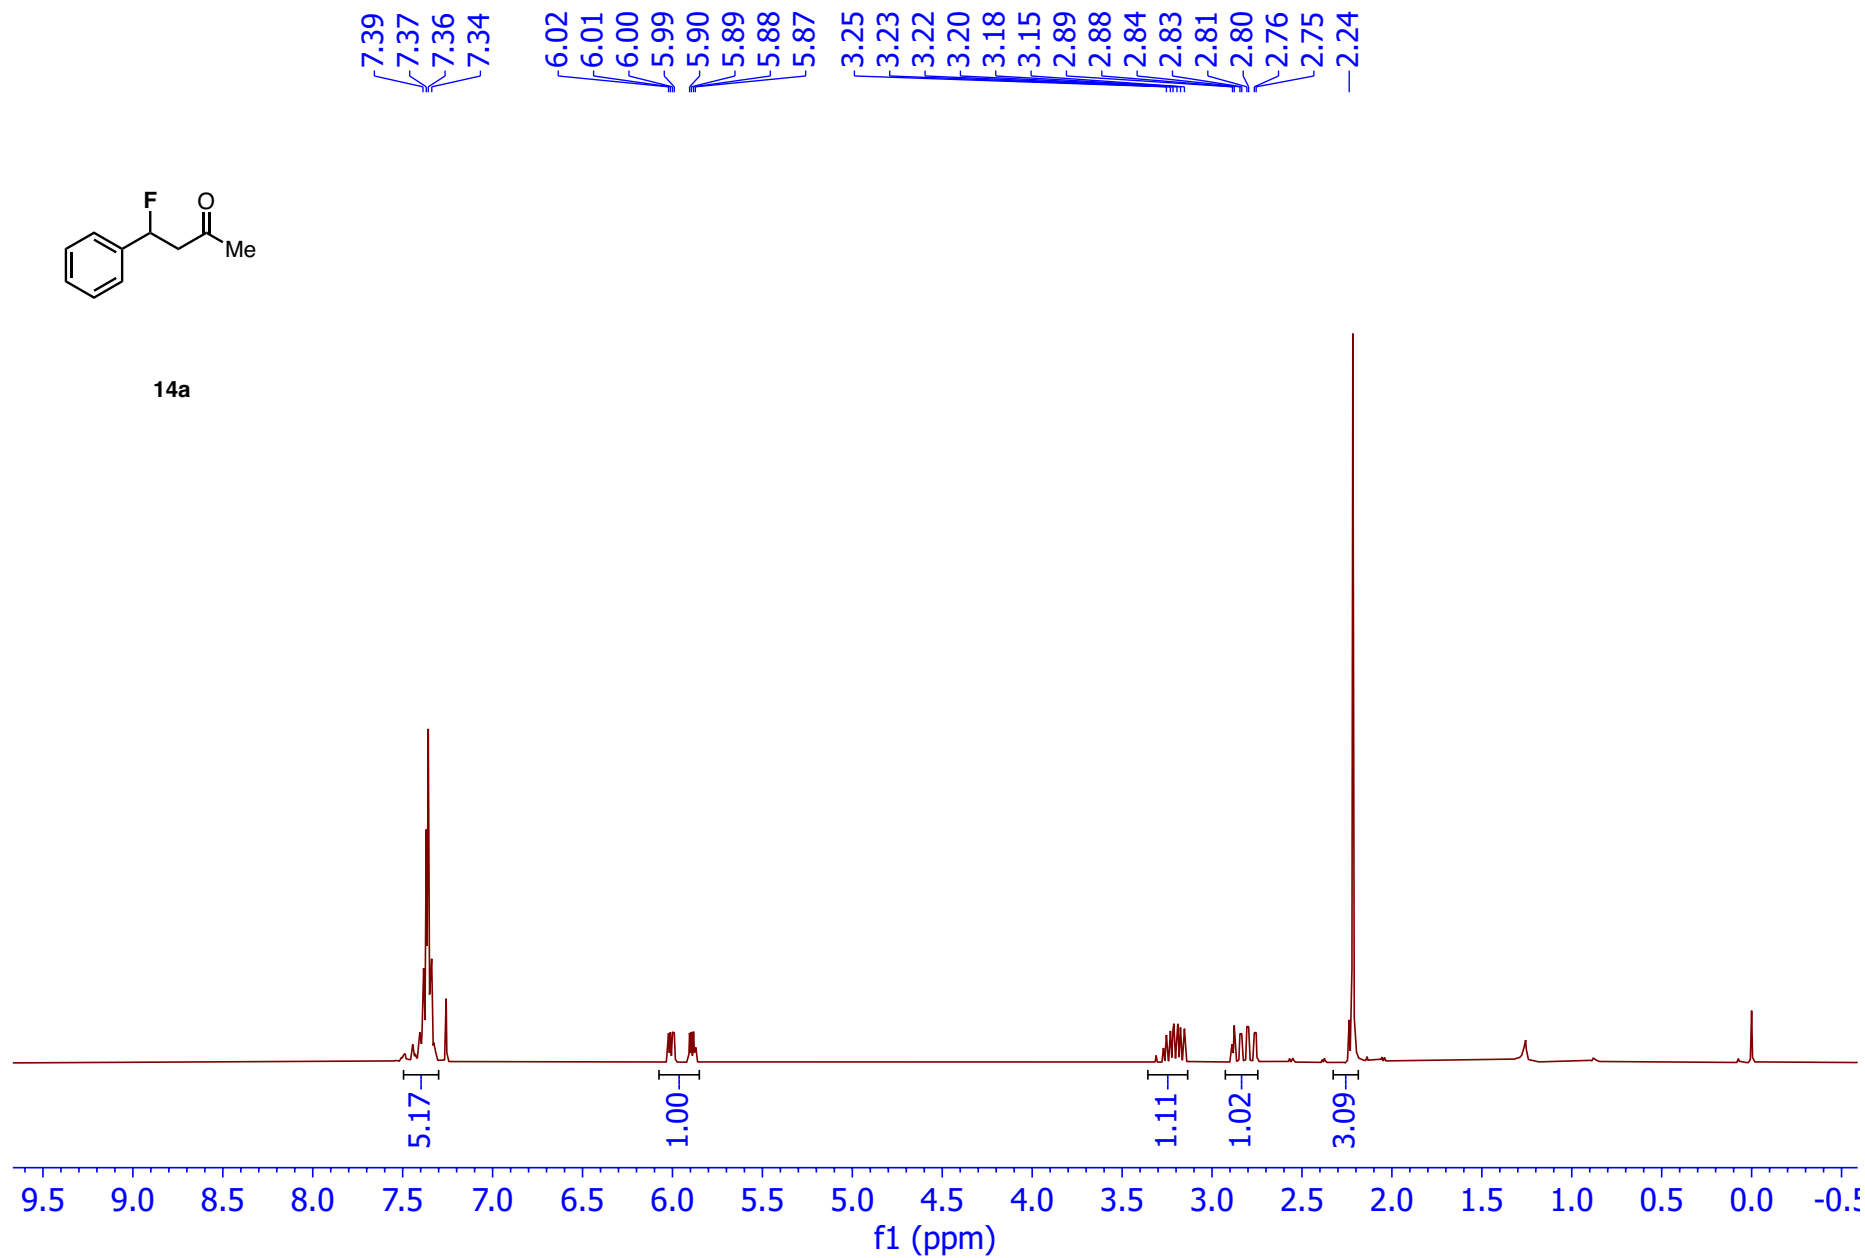

<sup>1</sup>H NMR of 14a



400 HMz, Chloroform-d

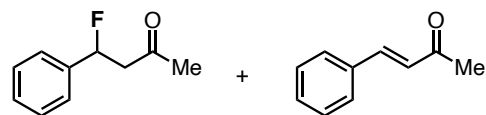

14a

14a-byproduct

7.46  
7.42  
7.33  
7.33  
7.30  
7.28  
7.26  
6.67  
6.63  
5.95  
5.94  
5.93  
5.92  
5.83  
5.82  
5.81  
5.80

3.18  
3.16  
3.14  
3.14  
3.12  
3.12  
3.10  
3.08  
2.81  
2.80  
2.77  
2.76  
2.73  
2.72  
2.69  
2.68  
2.31  
2.14

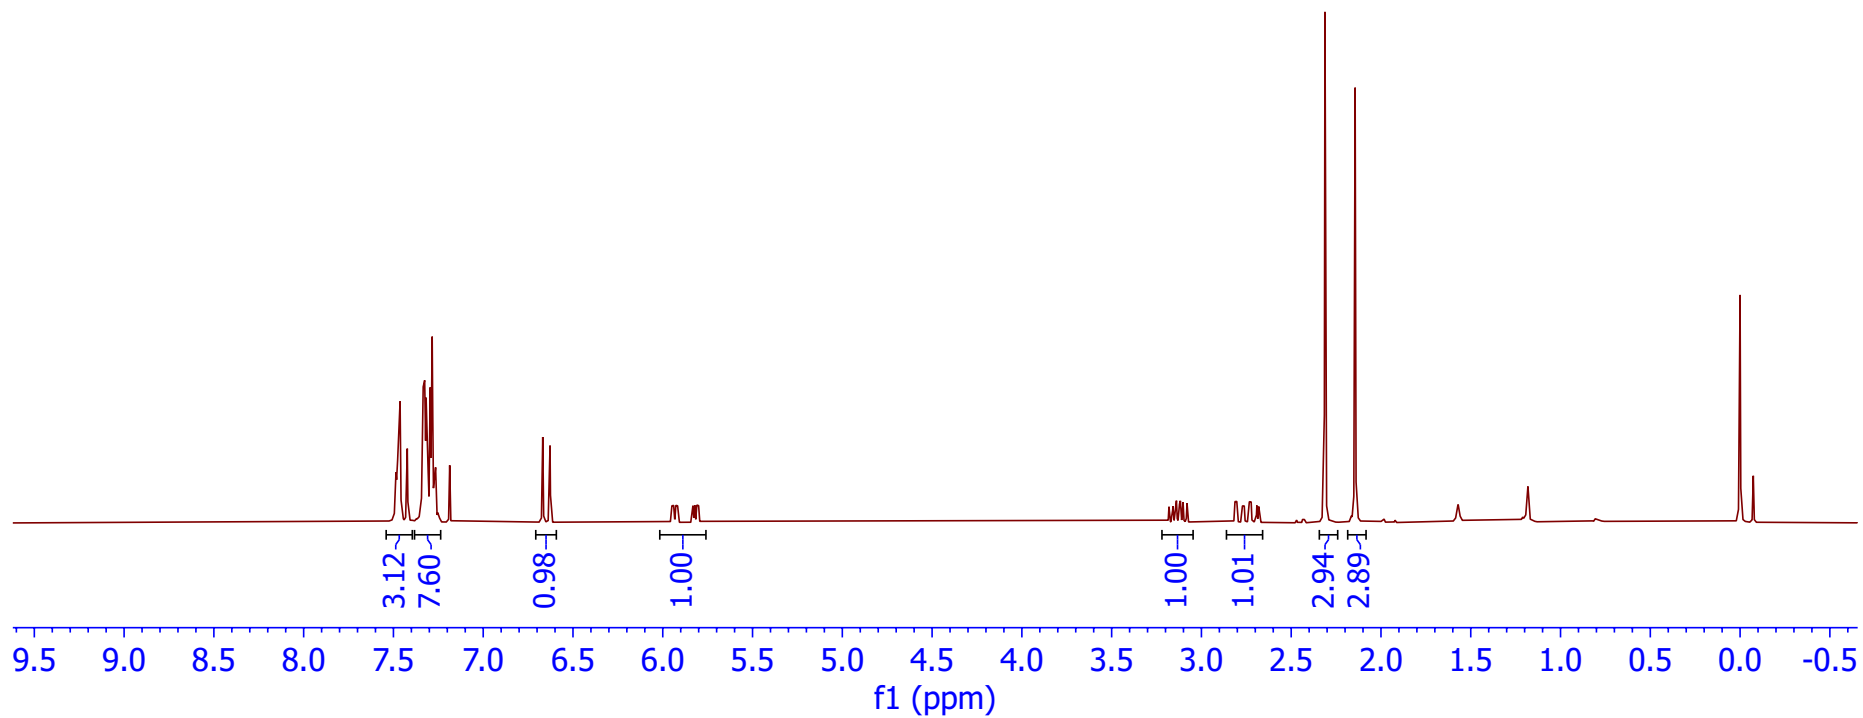

<sup>1</sup>H NMR of 14a

376MHz, Chloroform-d

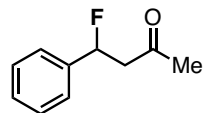

14a

-174.09  
-174.10

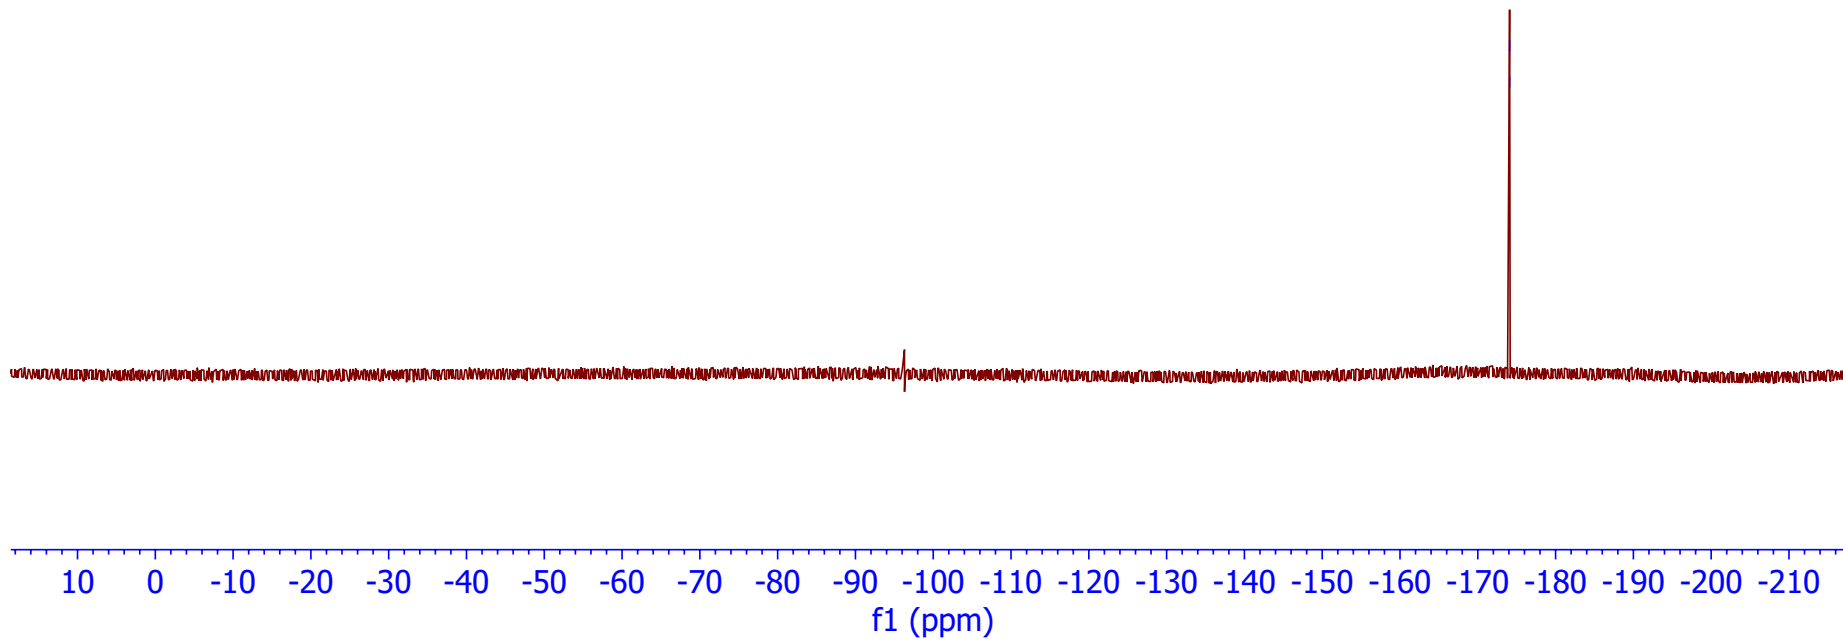

$^{19}\text{F}$  NMR of 14a

400 HMz, Chloroform-d

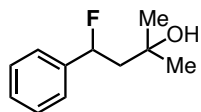

14b

7.38  
7.36  
7.35  
7.34  
7.33  
7.32

5.86  
5.86  
5.84  
5.83  
5.74  
5.74  
5.72  
5.71

2.29  
2.27  
2.25  
2.23  
2.21  
2.19  
2.00  
1.96  
1.95  
1.92  
1.91  
1.89  
1.42  
1.41  
1.37  
1.36

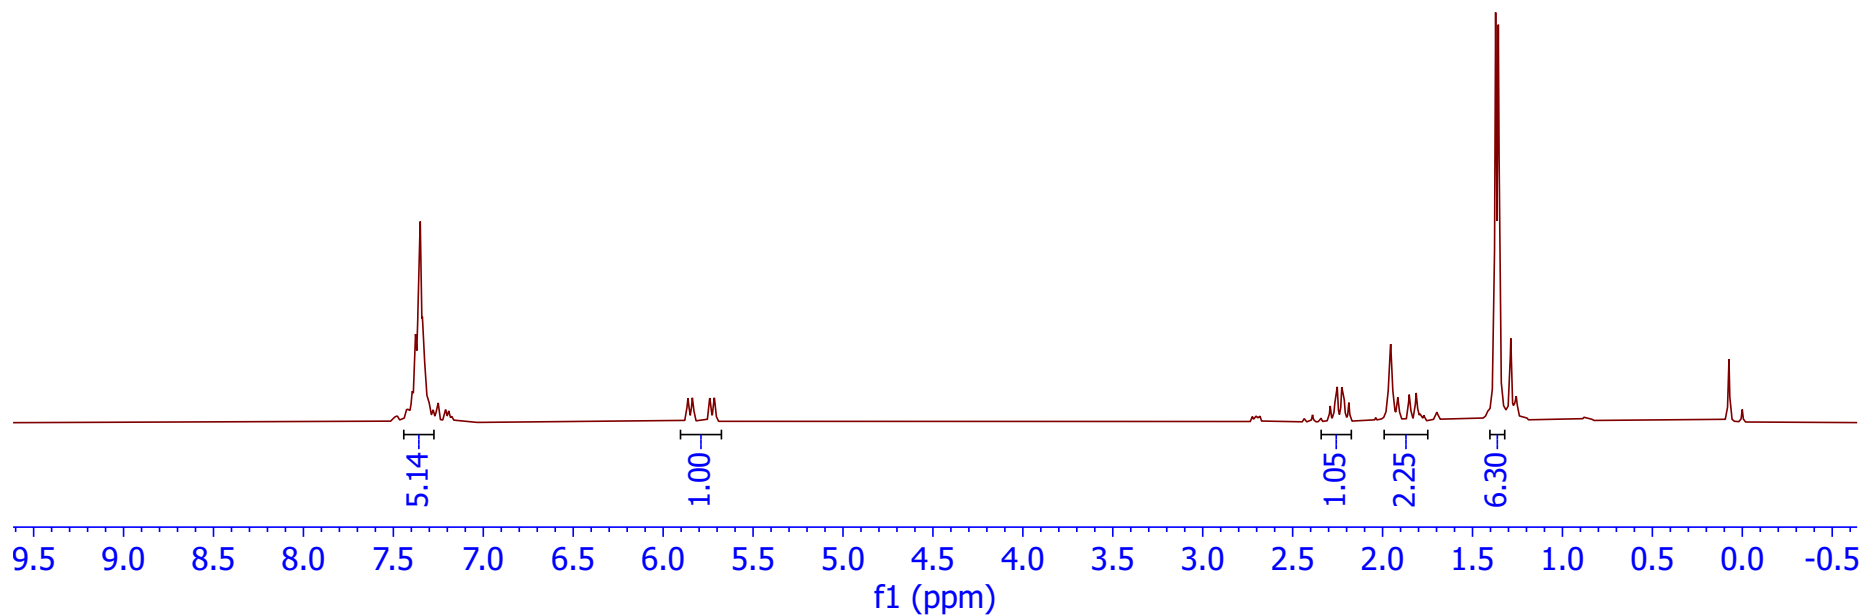

<sup>1</sup>H NMR of 14b

101 MHz, Chloroform-d

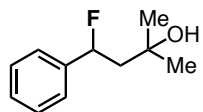

14b

139.67  
139.47  
128.79  
127.53  
127.49  
127.38  
127.34  
127.32  
127.29  
124.45  
124.39  
92.50  
92.48  
90.83  
90.81  
69.14  
68.93  
49.32  
49.30  
49.09  
28.92  
28.80

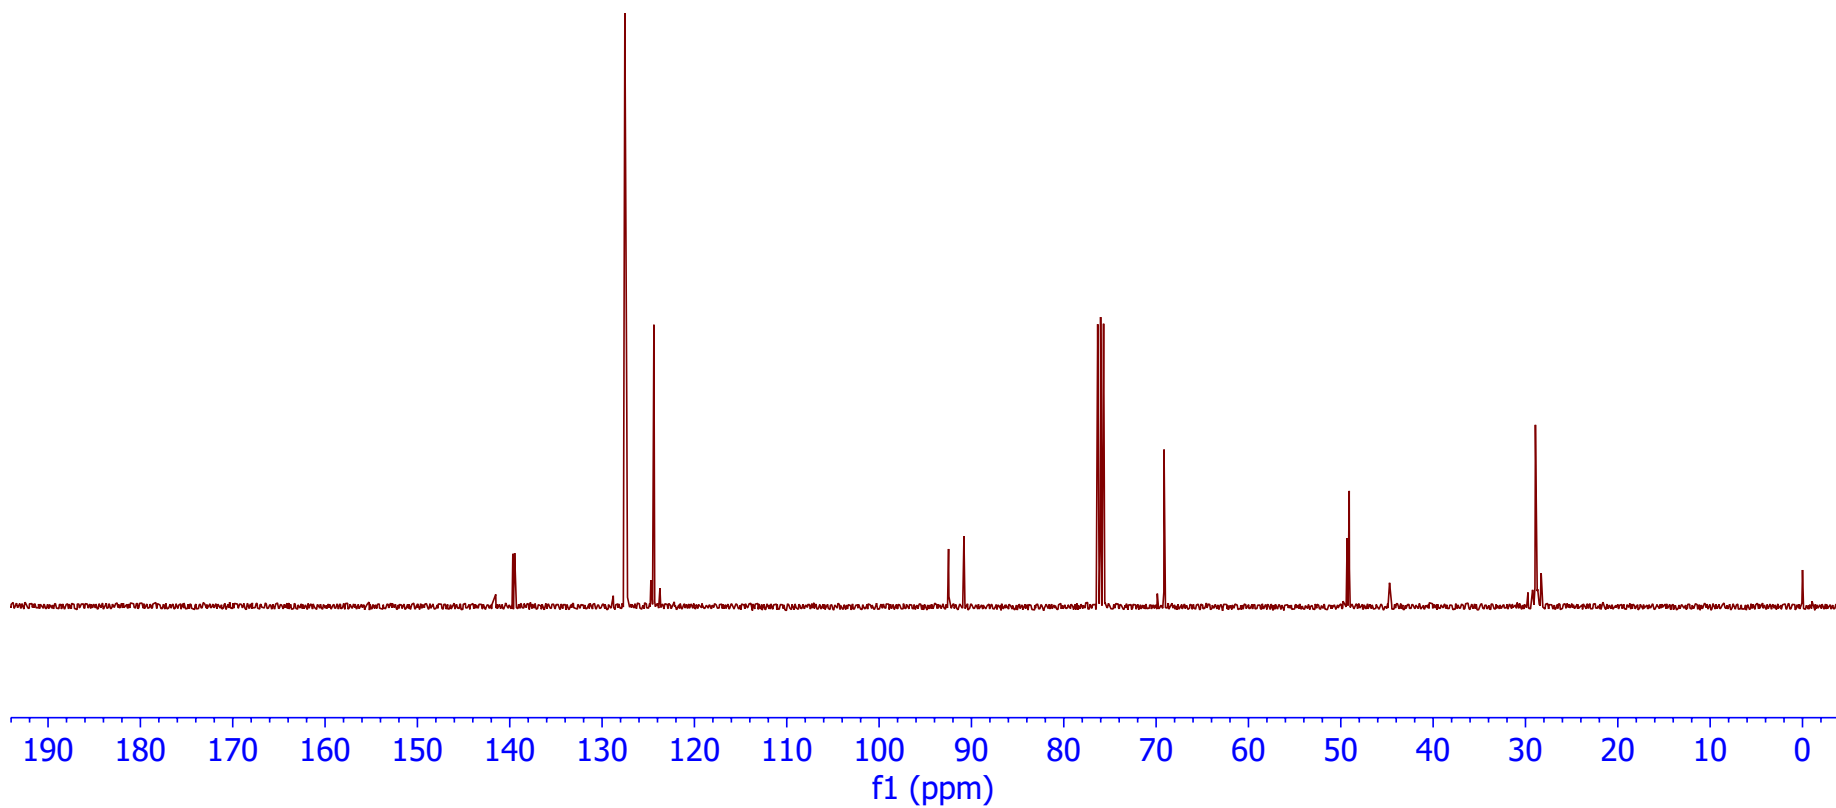

<sup>13</sup>C NMR of 14b

376MHz, Chloroform-d



14b

--173.19  
--173.30  
--173.31  
--173.34  
--173.35

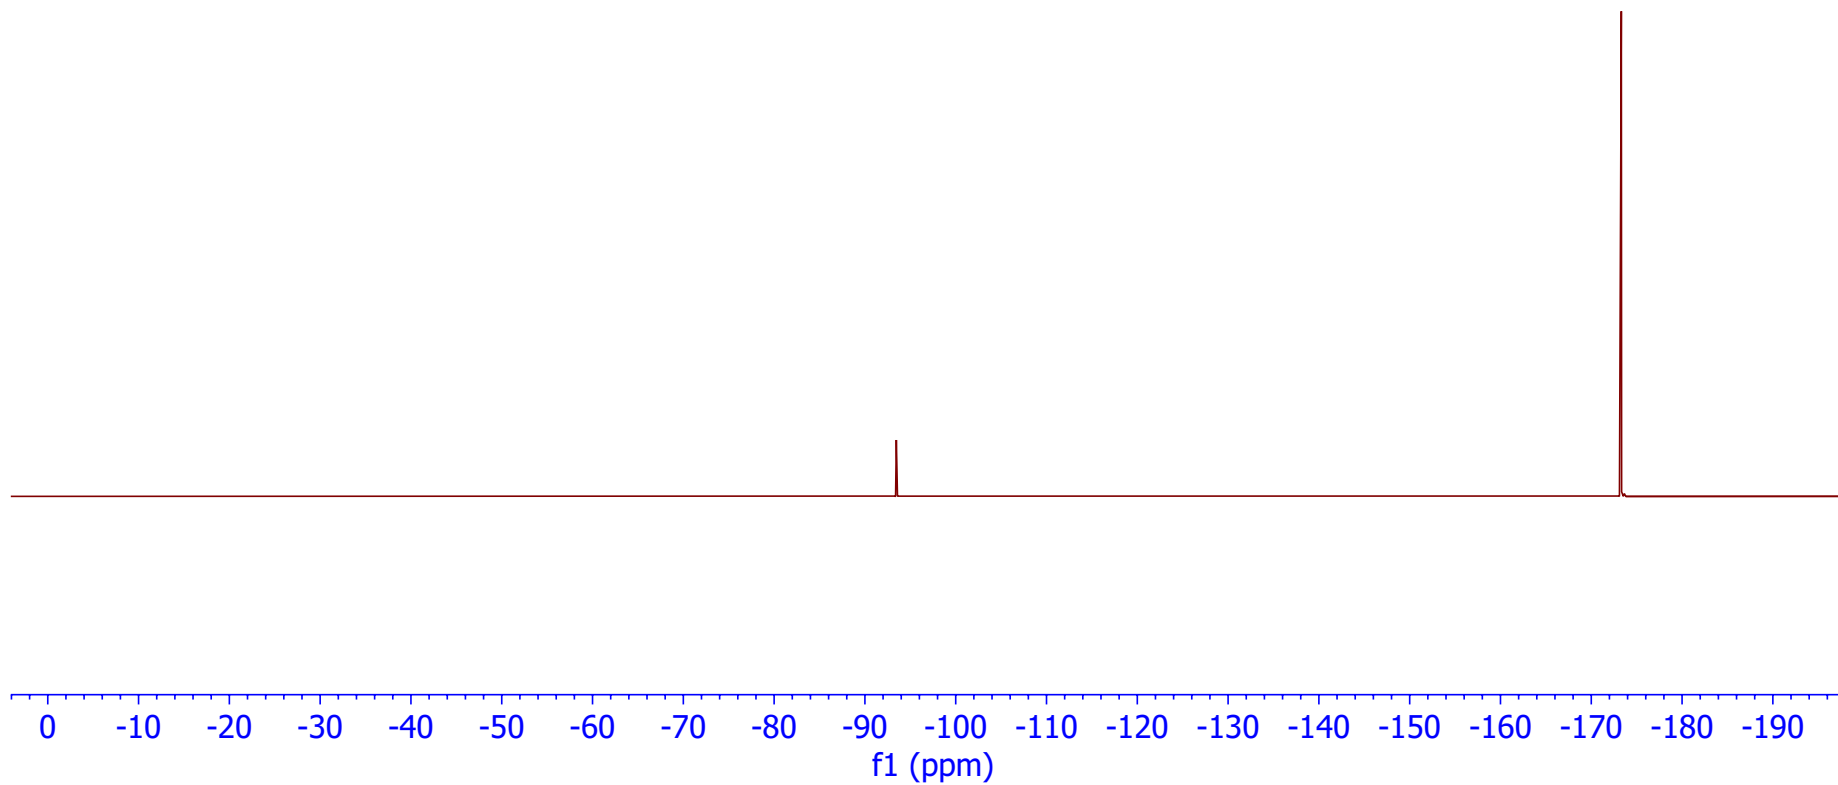

$^{19}\text{F}$  NMR of 14b

400 HMz, Chloroform-d

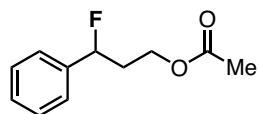

14c

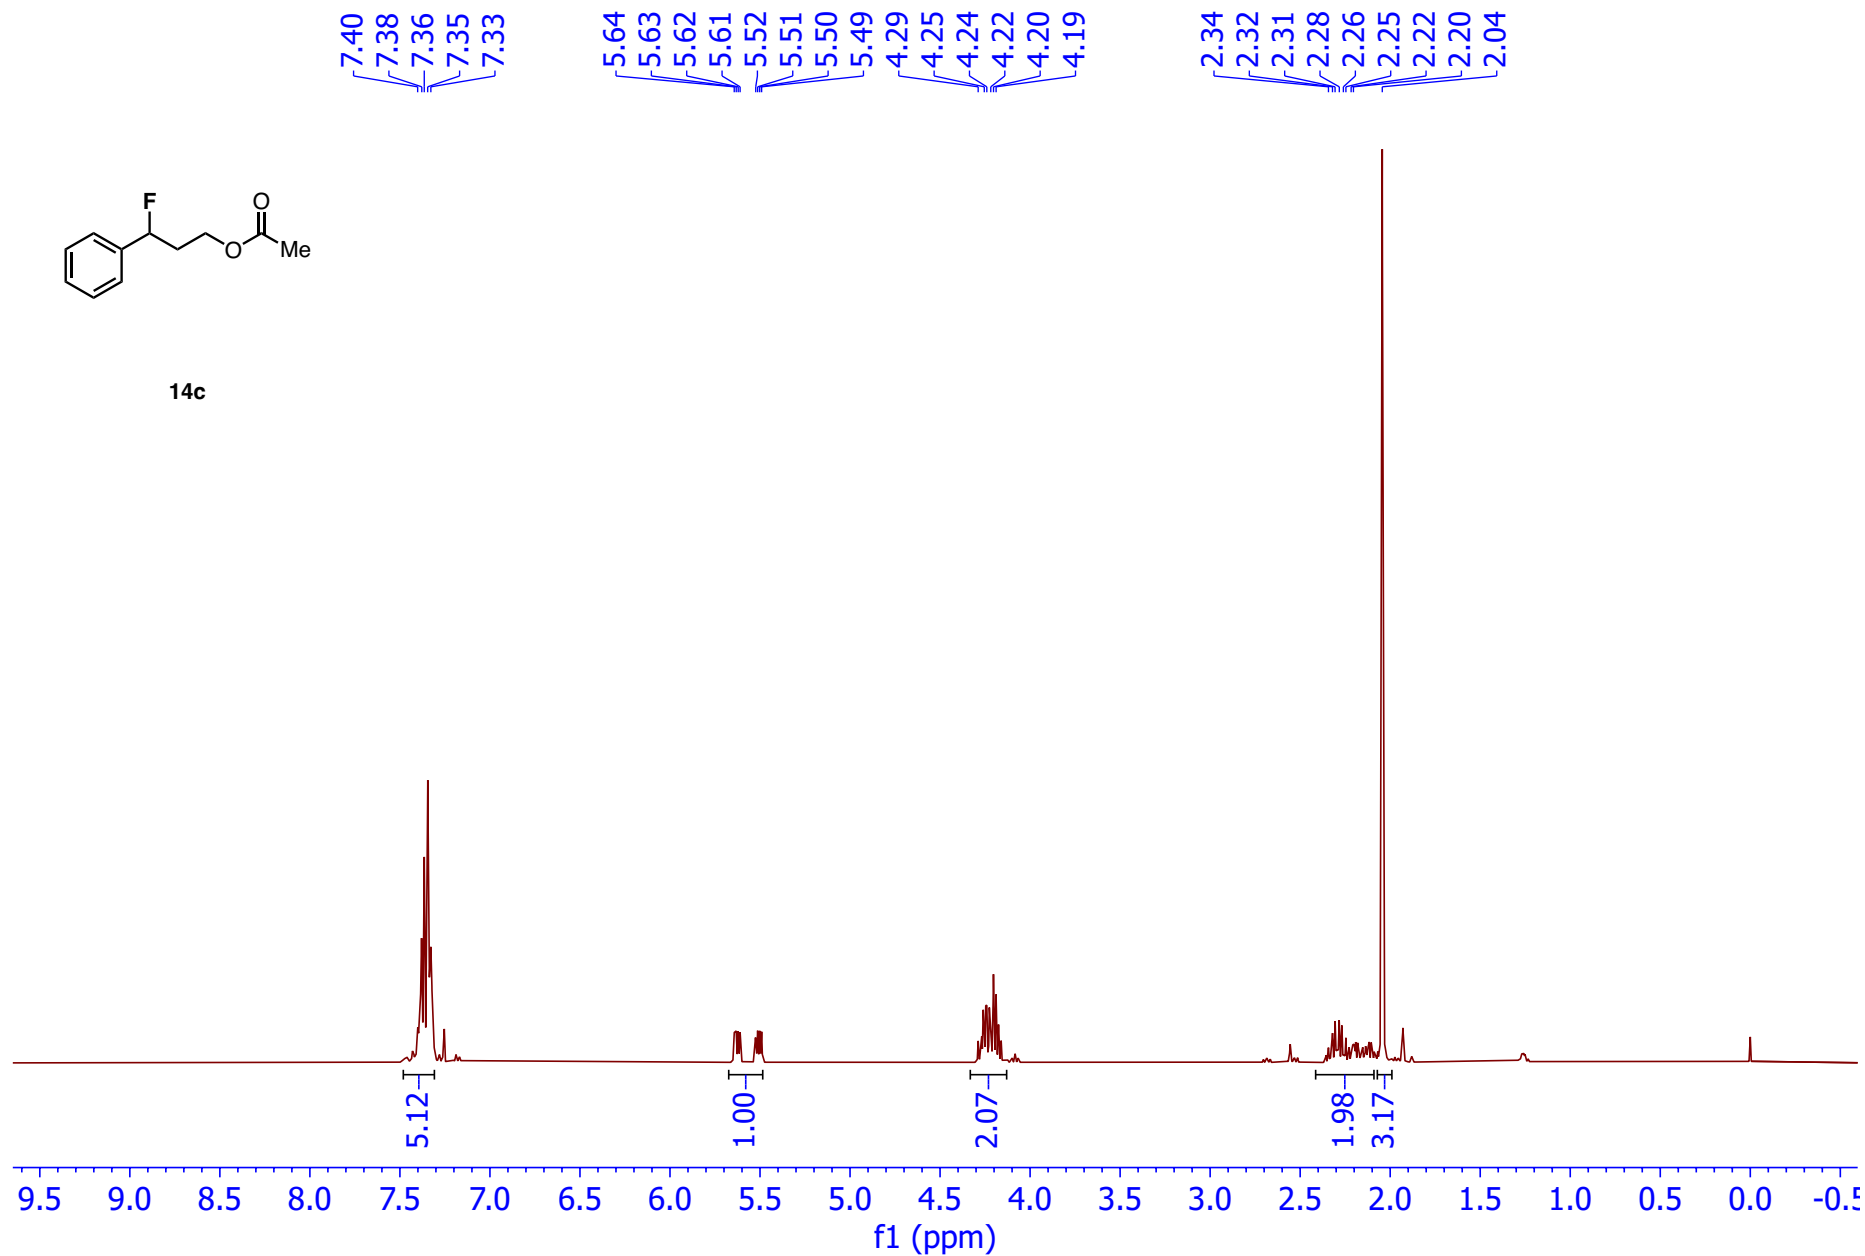

<sup>1</sup>H NMR of 14c

101 MHz, Chloroform-d

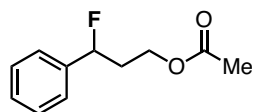

14c

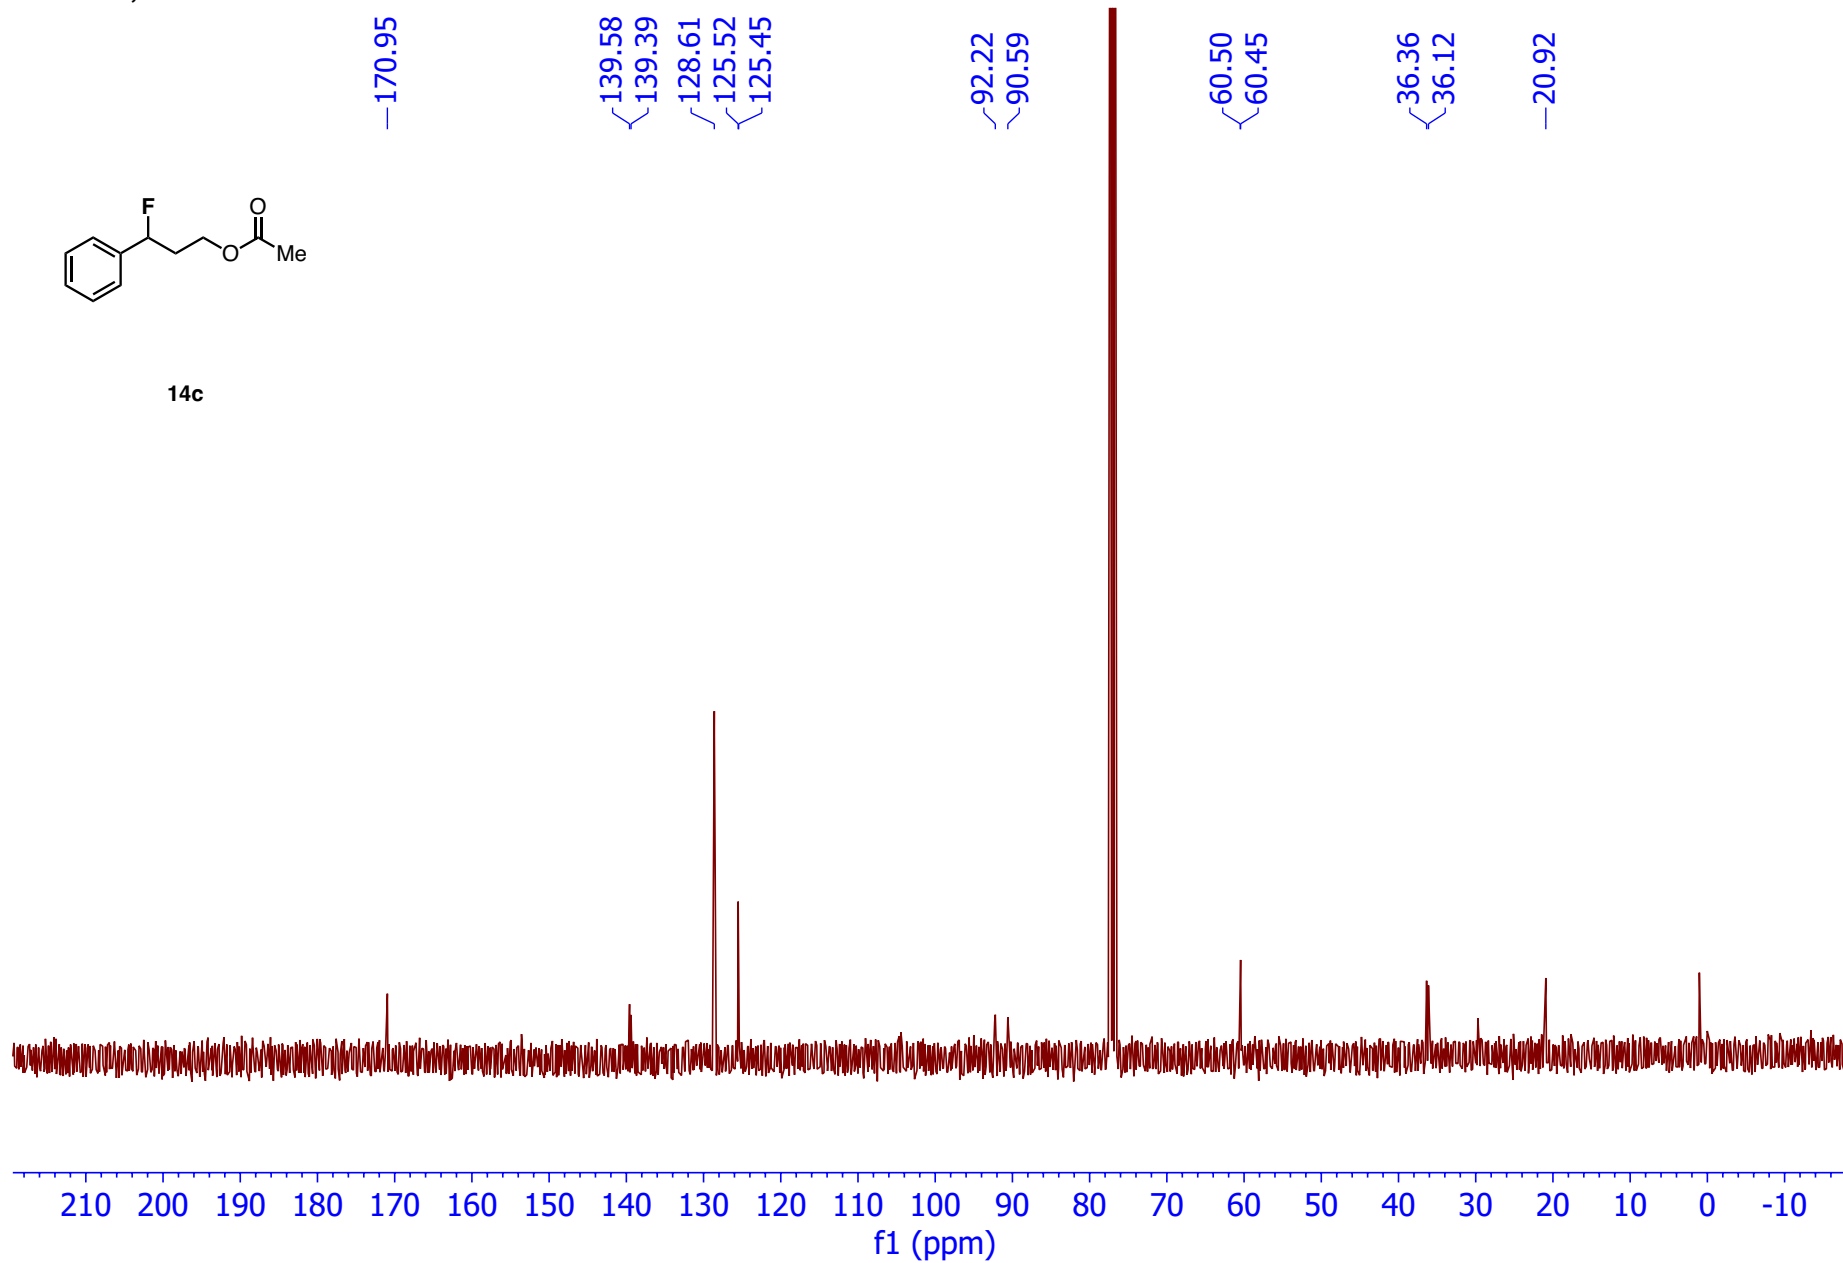

<sup>13</sup>C NMR of 14c

376MHz, Chloroform-d



14c

--177.39

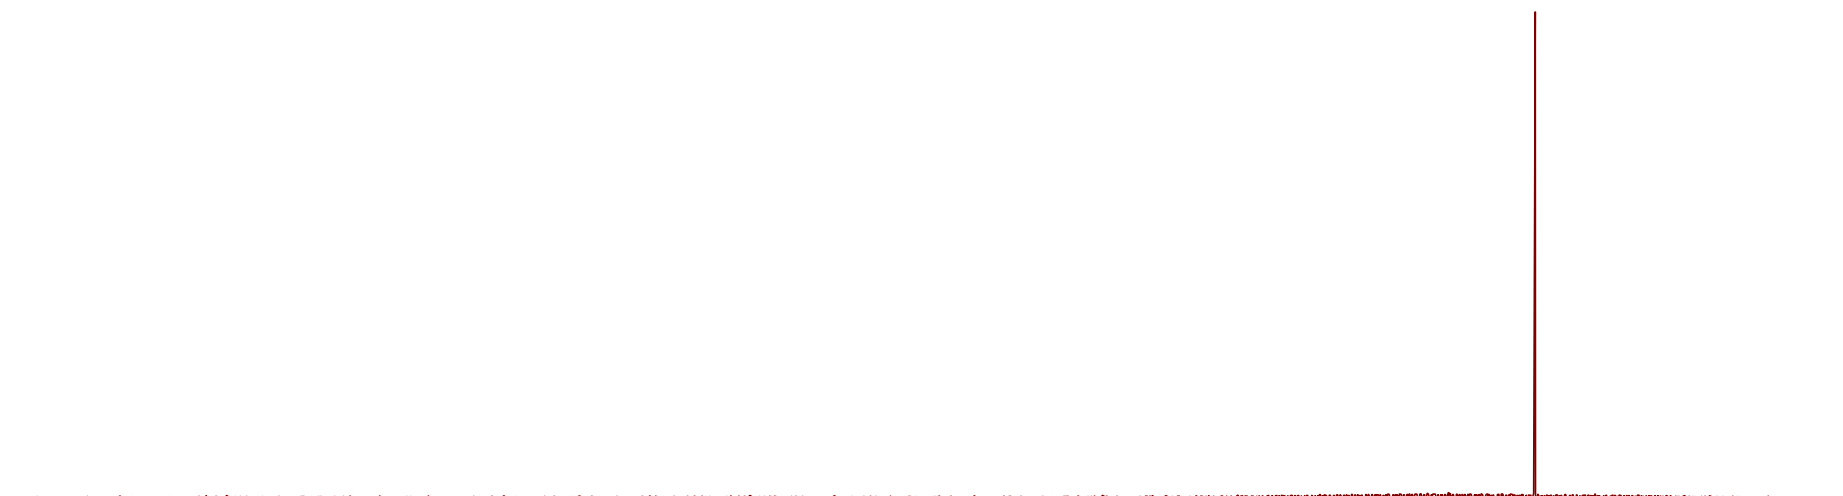

10 0 -10 -20 -30 -40 -50 -60 -70 -80 -90 -100 -110 -120 -130 -140 -150 -160 -170 -180 -190 -200 -210

f1 (ppm)

<sup>9</sup>F NMR of 14c



400 HMz, Chloroform-d

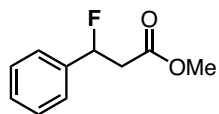

14d

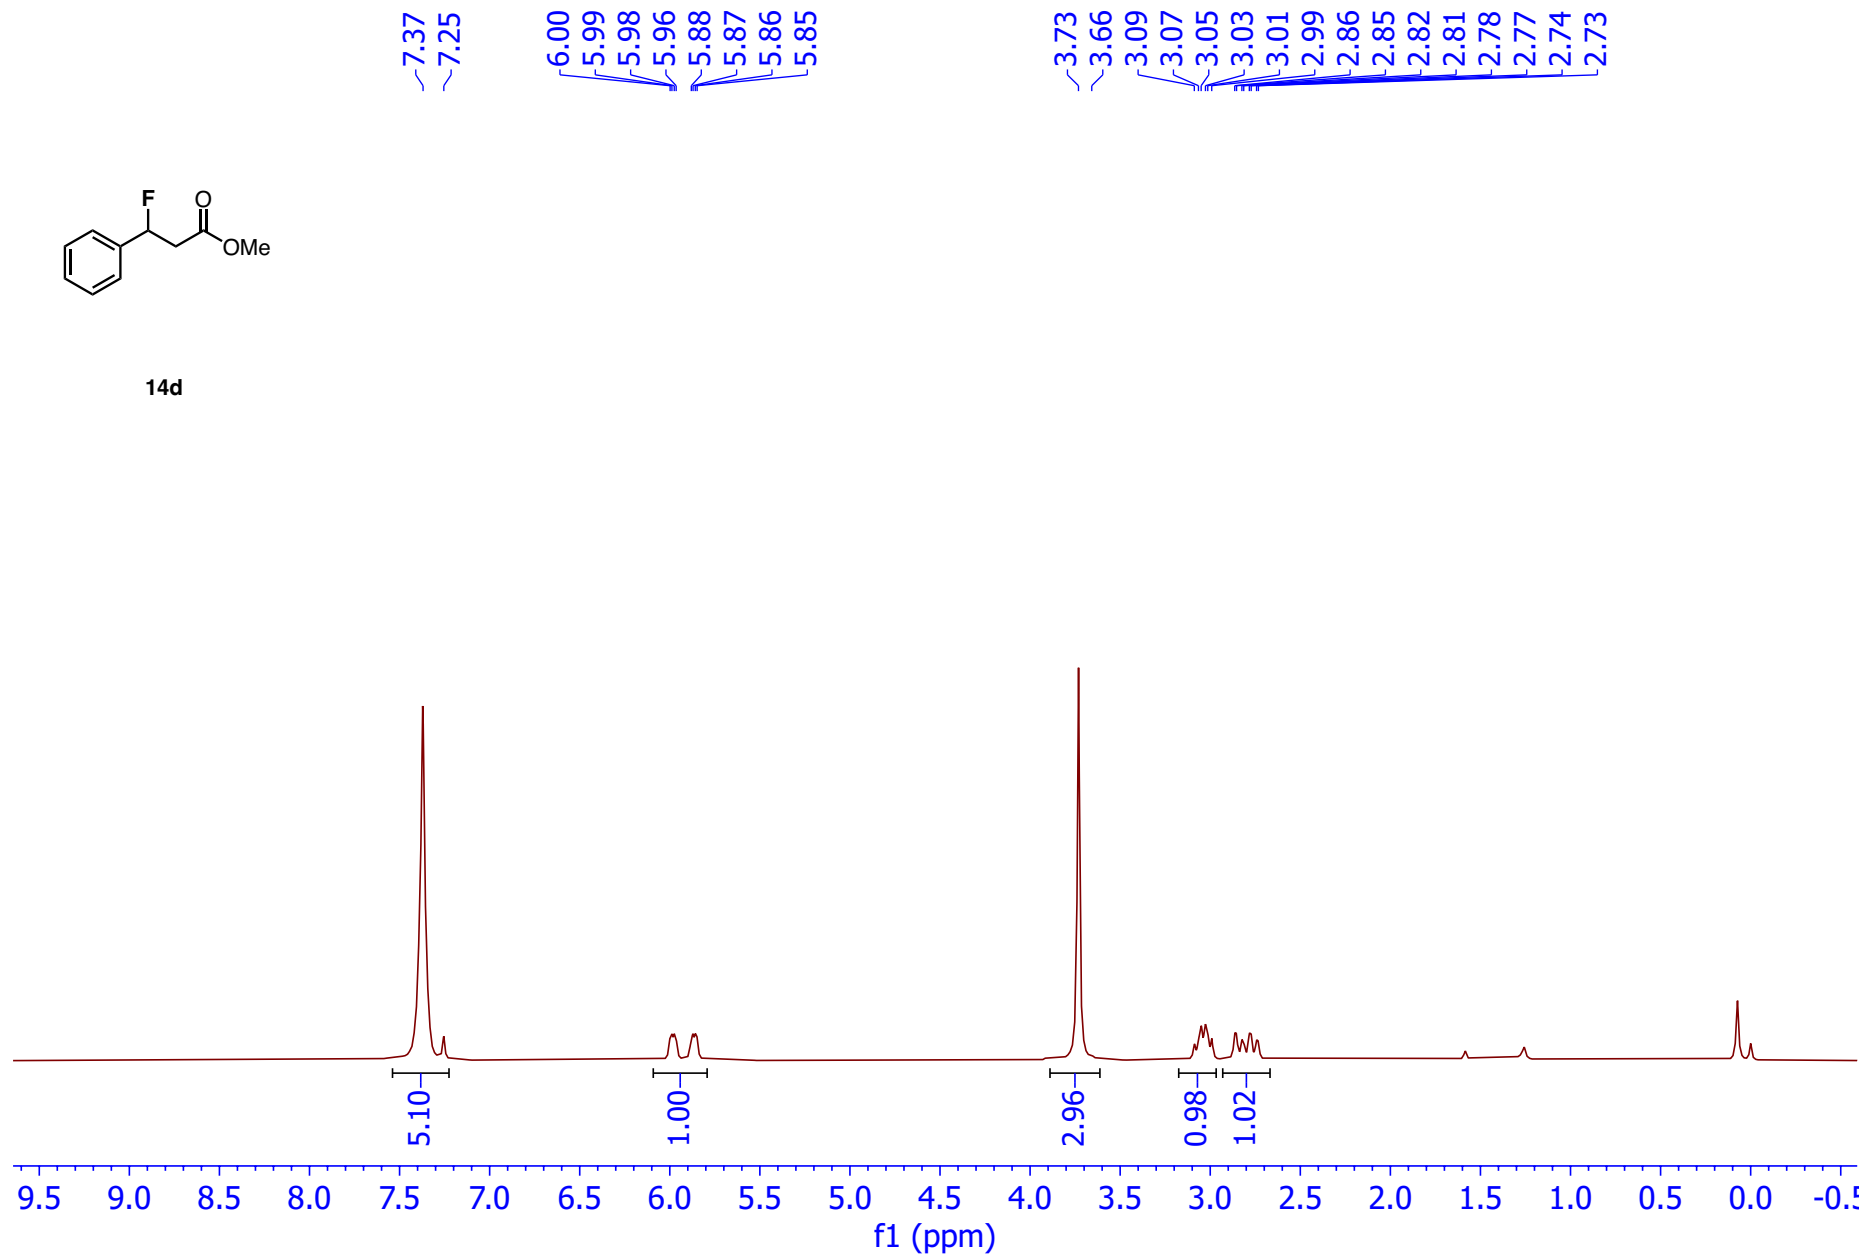

<sup>1</sup>H NMR of 14d

101 MHz, Chloroform-d

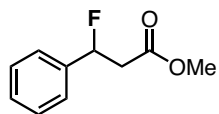

14d

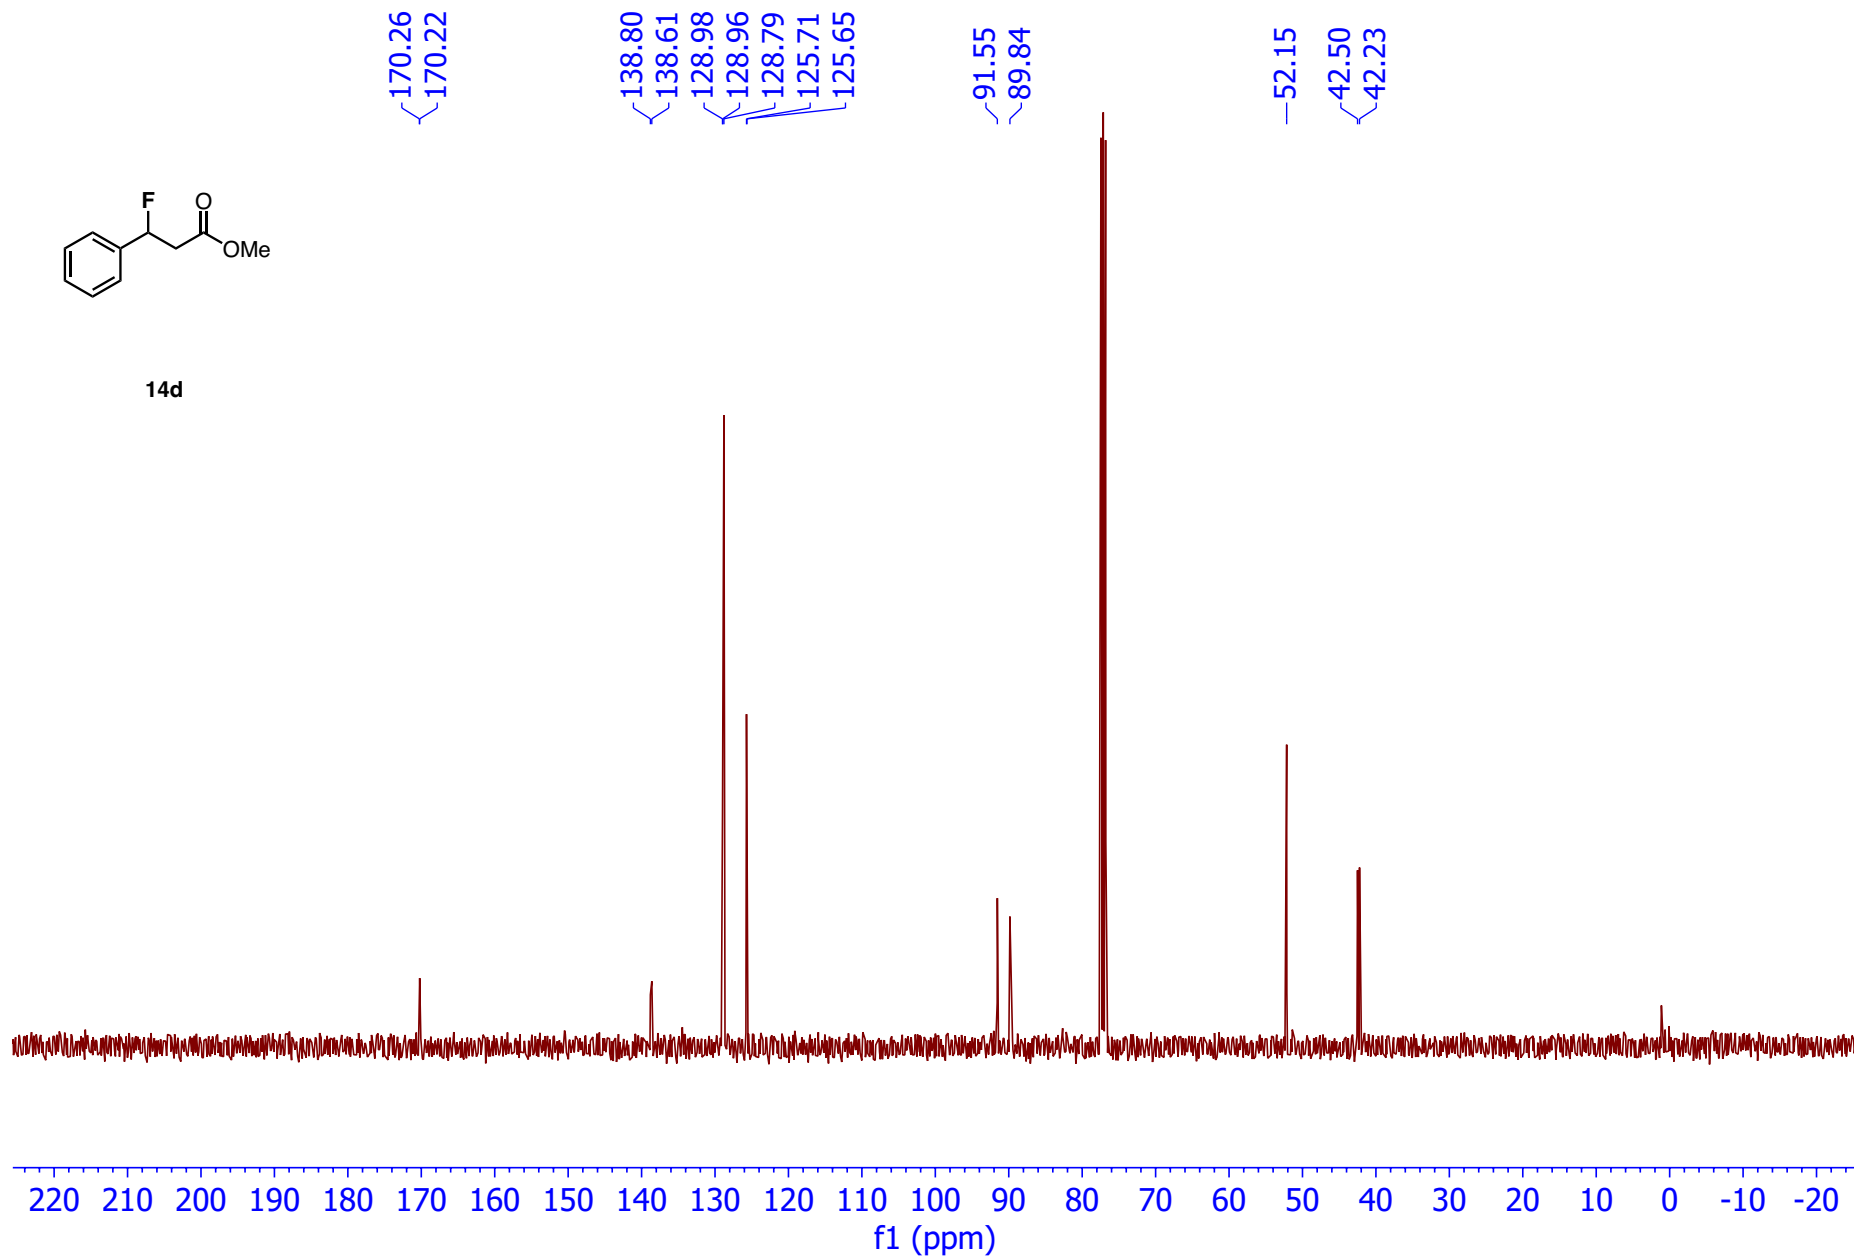

<sup>13</sup>C NMR of 14d

376MHz, Chloroform-d



14d

--173.18

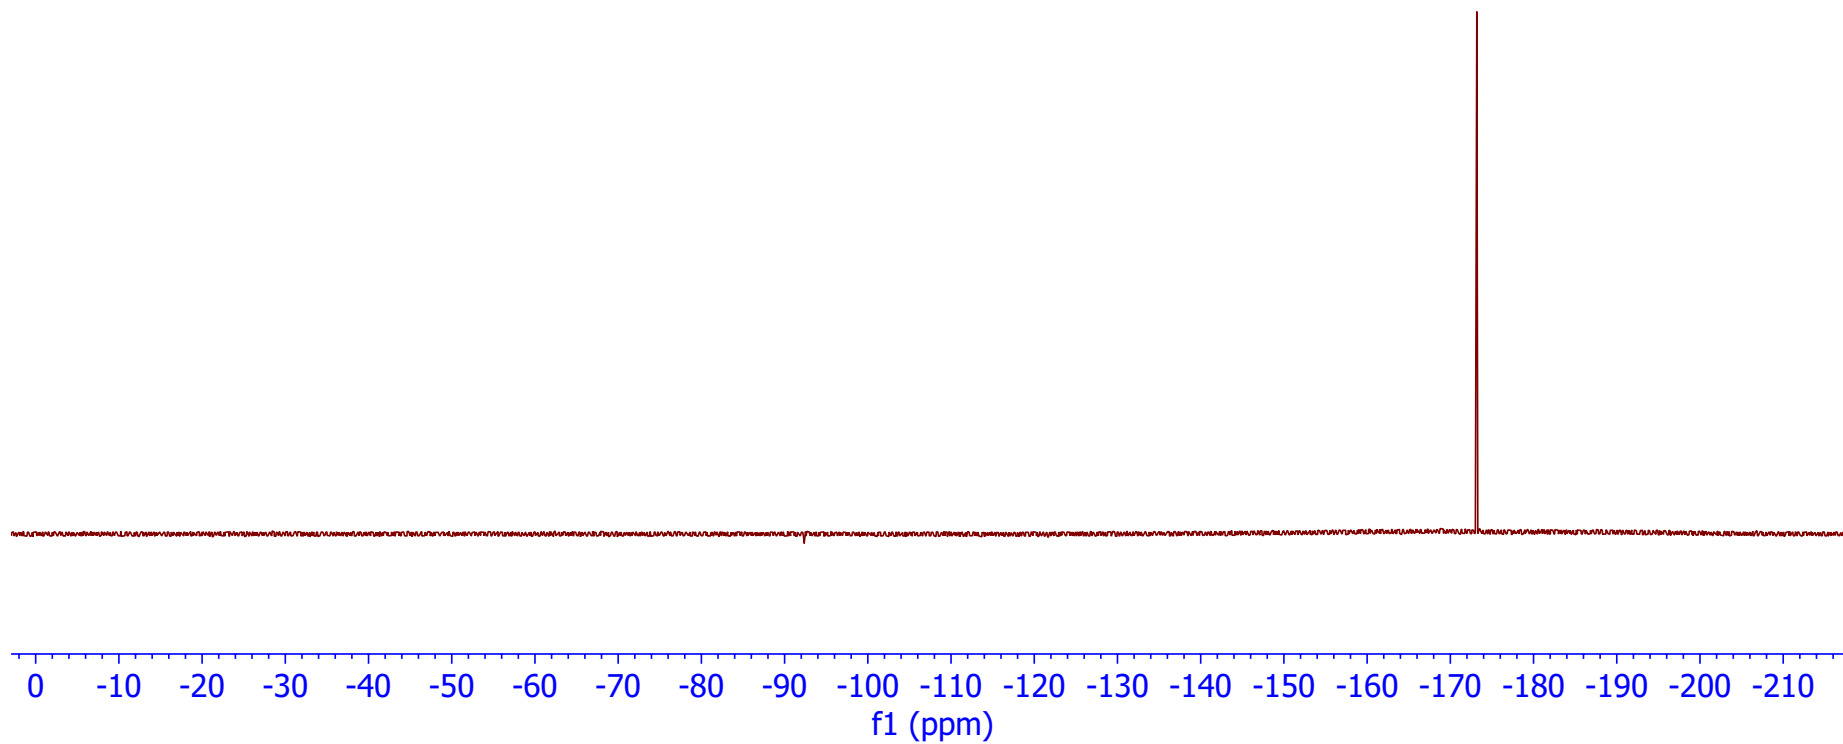

<sup>19</sup>F NMR of 14d

400 HMz, Chloroform-d

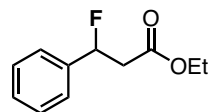

14e

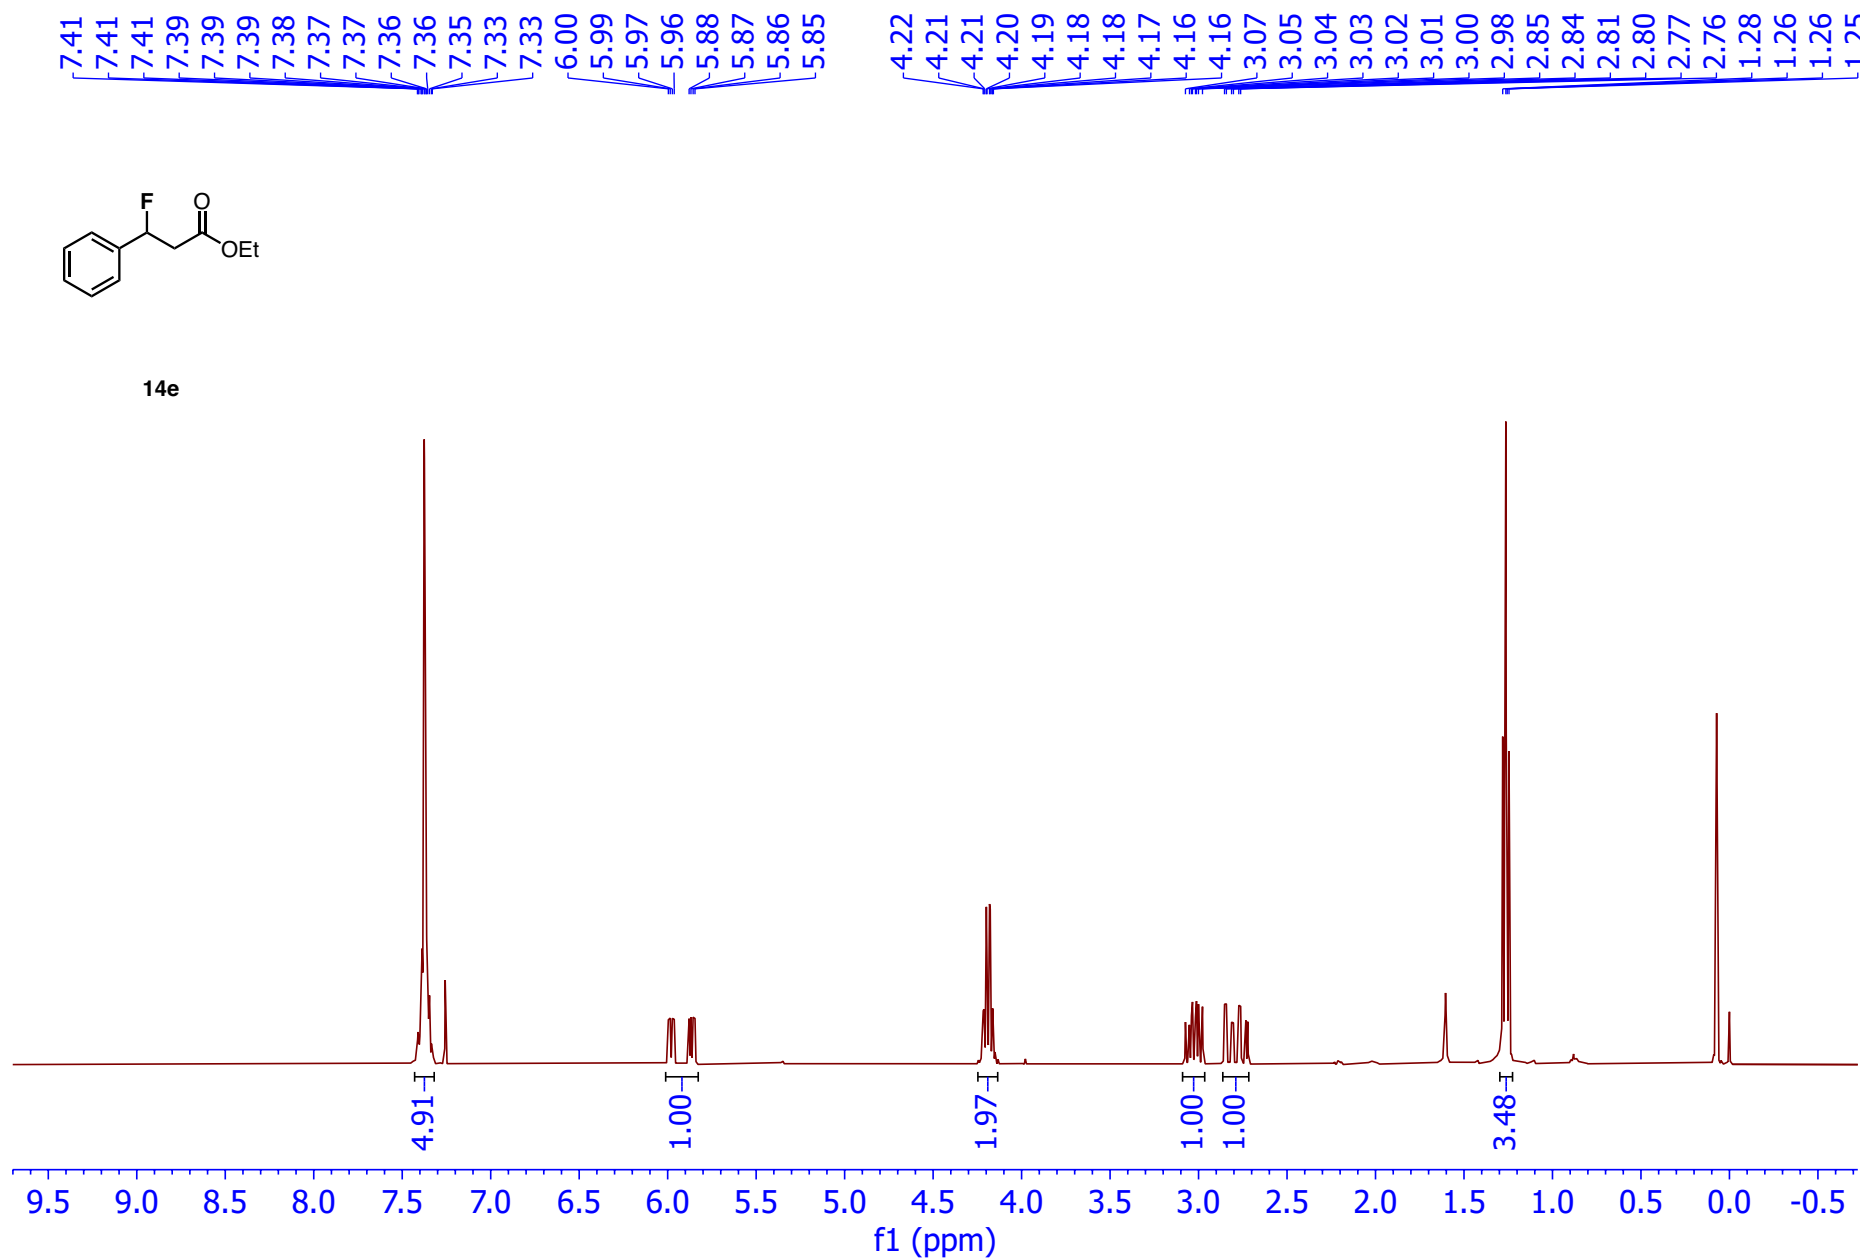

<sup>1</sup>H NMR of 14e

101 MHz, Chloroform-d

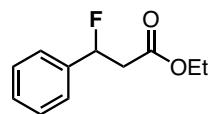

14e

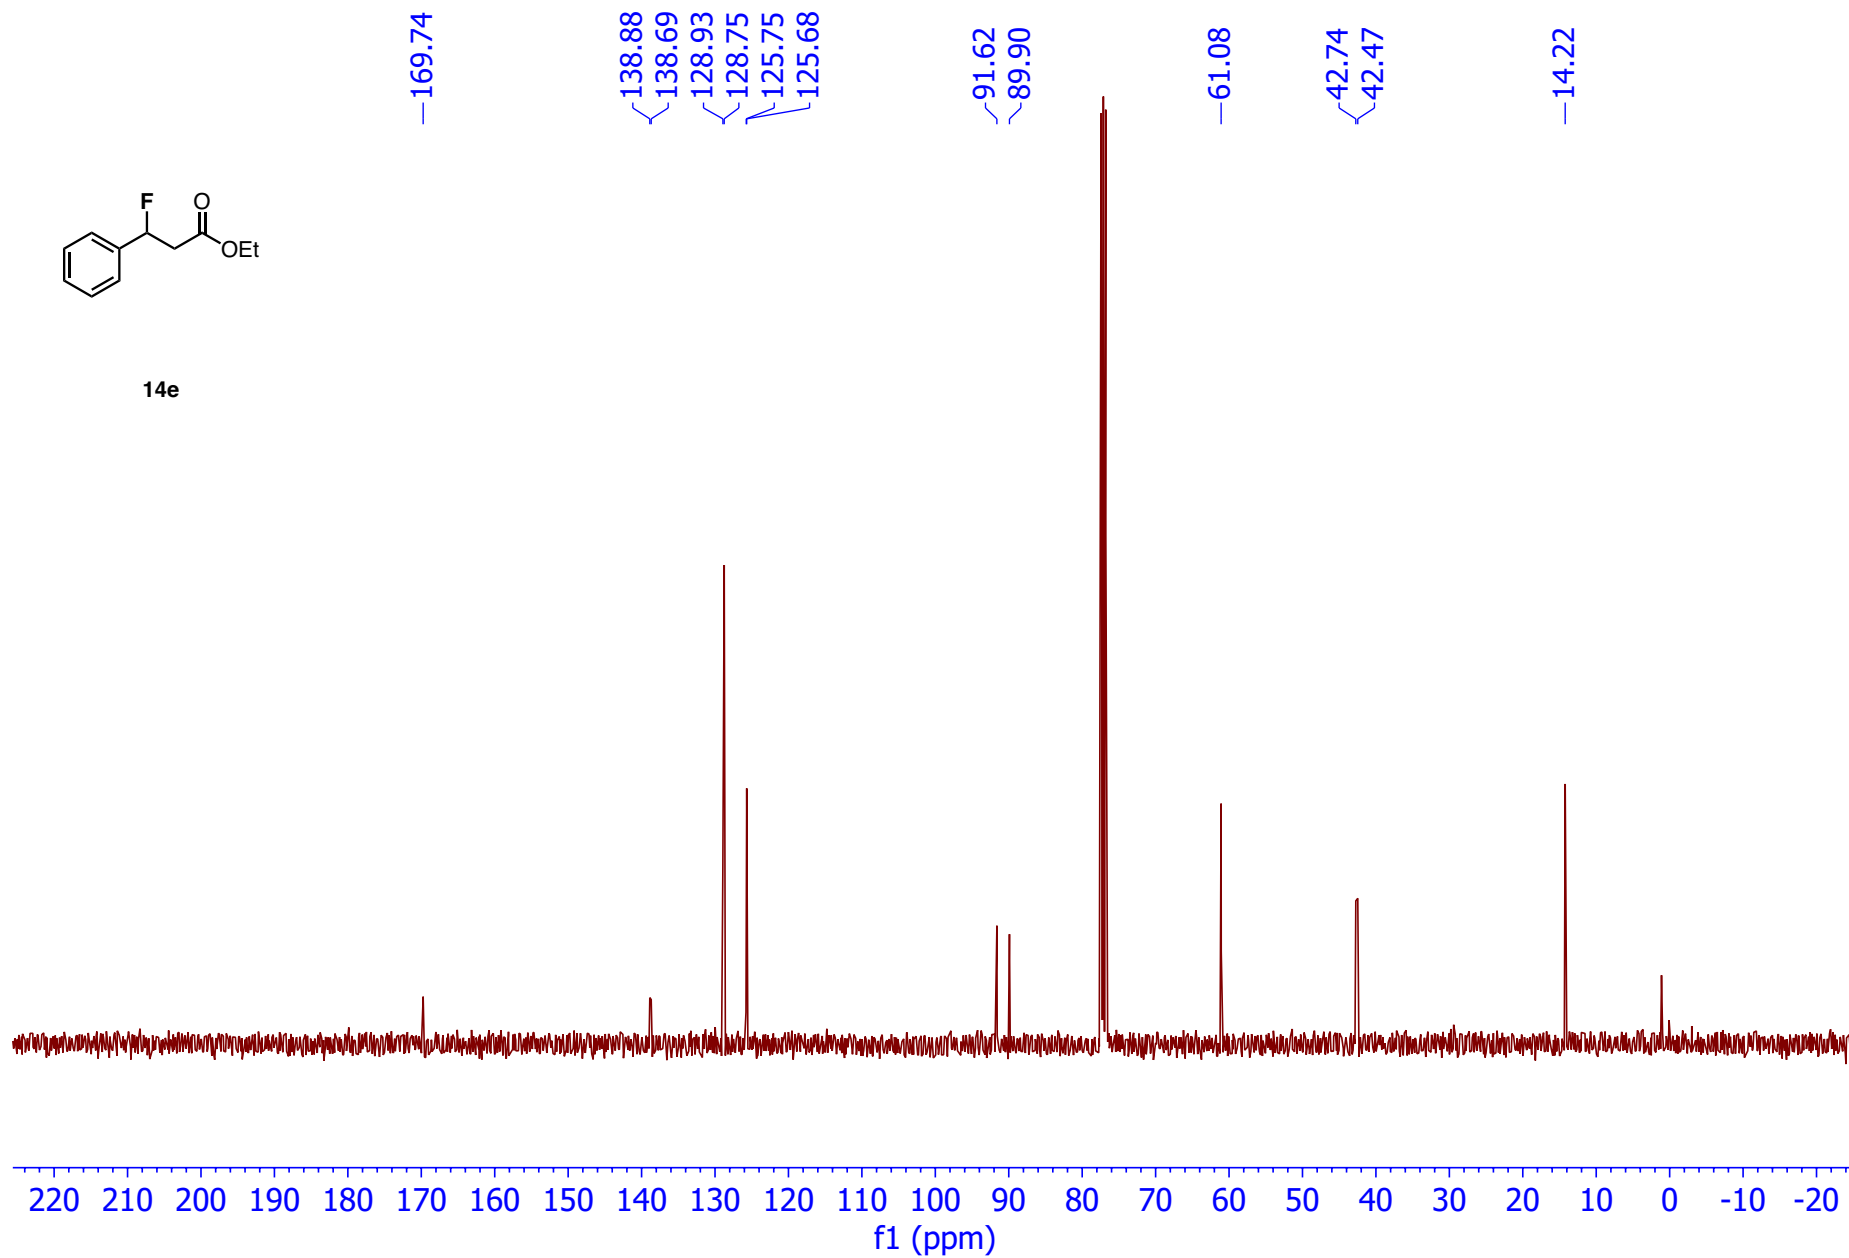

<sup>13</sup>C NMR of 14e

376MHz, Chloroform-d

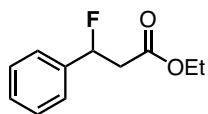

14e

-172.90  
-172.93  
-172.96  
-172.98  
-173.02  
-173.06  
-173.09  
-173.11  
-173.14  
-173.17  
-173.24  
-173.36  
-173.40

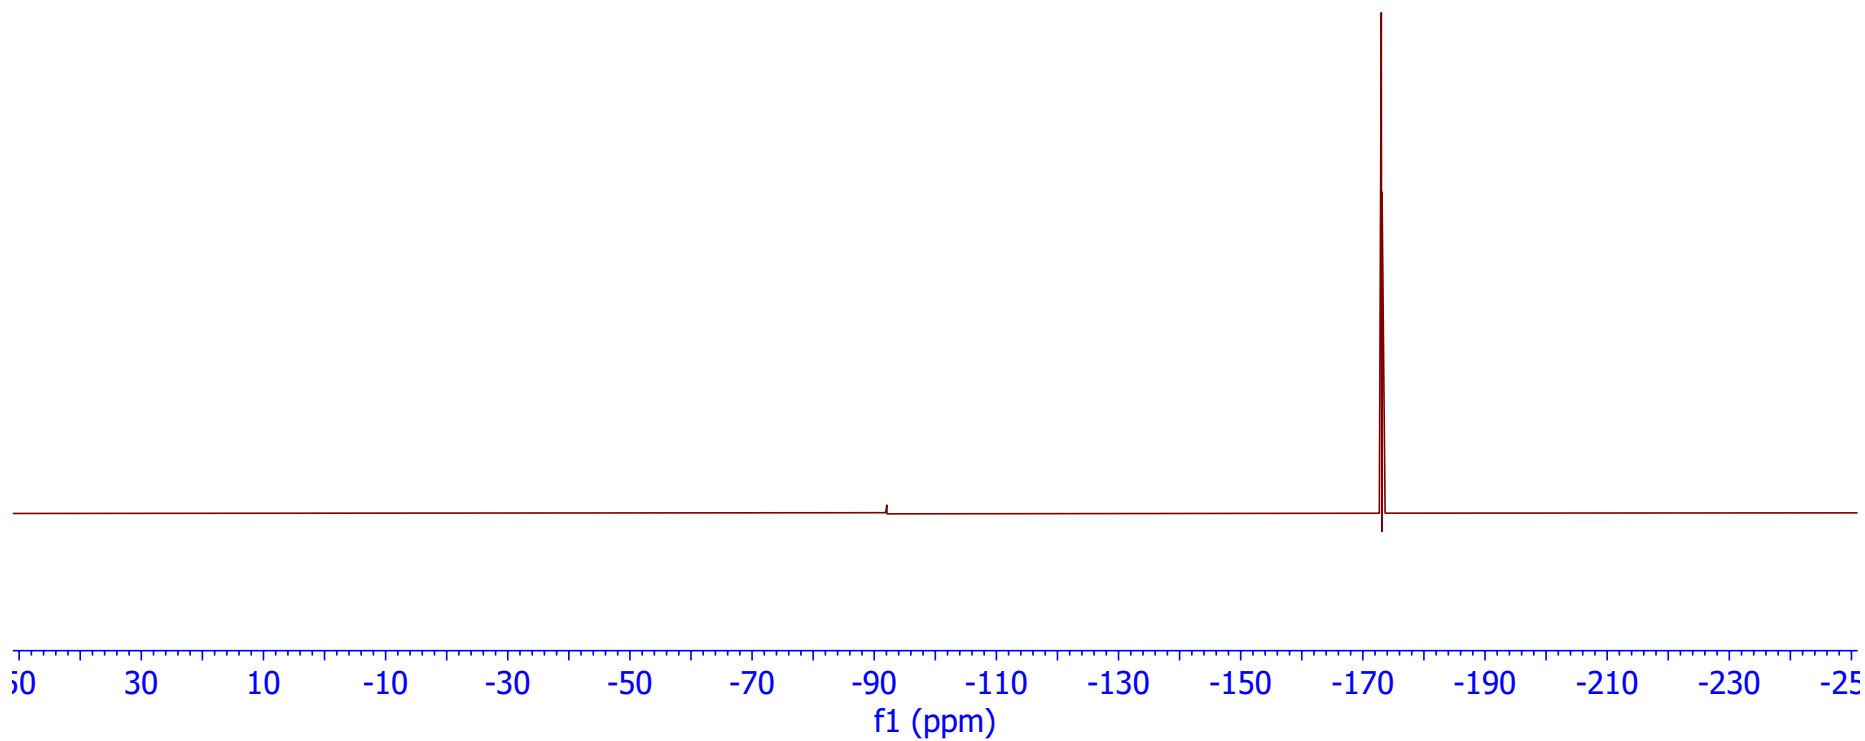

<sup>19</sup>F NMR of 14e

400 HMz, Chloroform-d

7.88  
7.86  
7.86  
7.84  
7.84  
7.83  
7.80  
7.52  
7.51  
7.50  
7.49  
7.49  
7.48  
7.47  
7.46  
5.88  
5.86  
5.85  
5.83  
5.76  
5.74  
5.73  
5.71  
5.35

1.77  
1.75  
1.71  
1.69

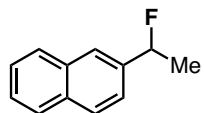

14f

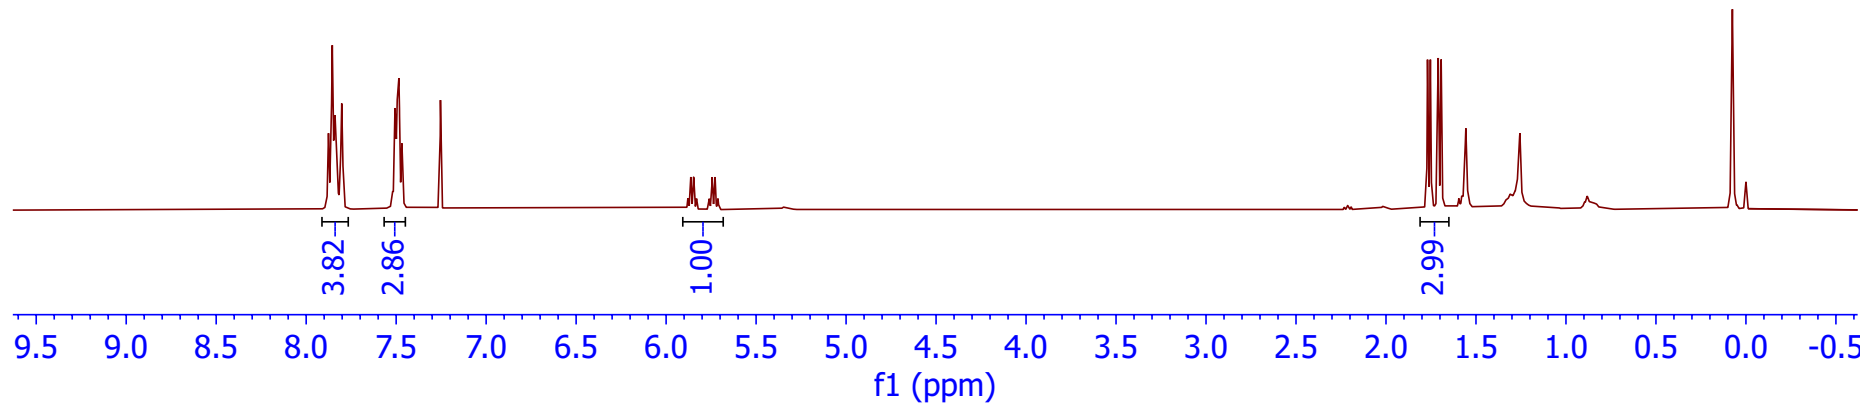

<sup>1</sup>H NMR of 14f

101 MHz, Chloroform-d

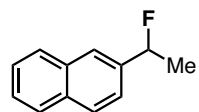

14f

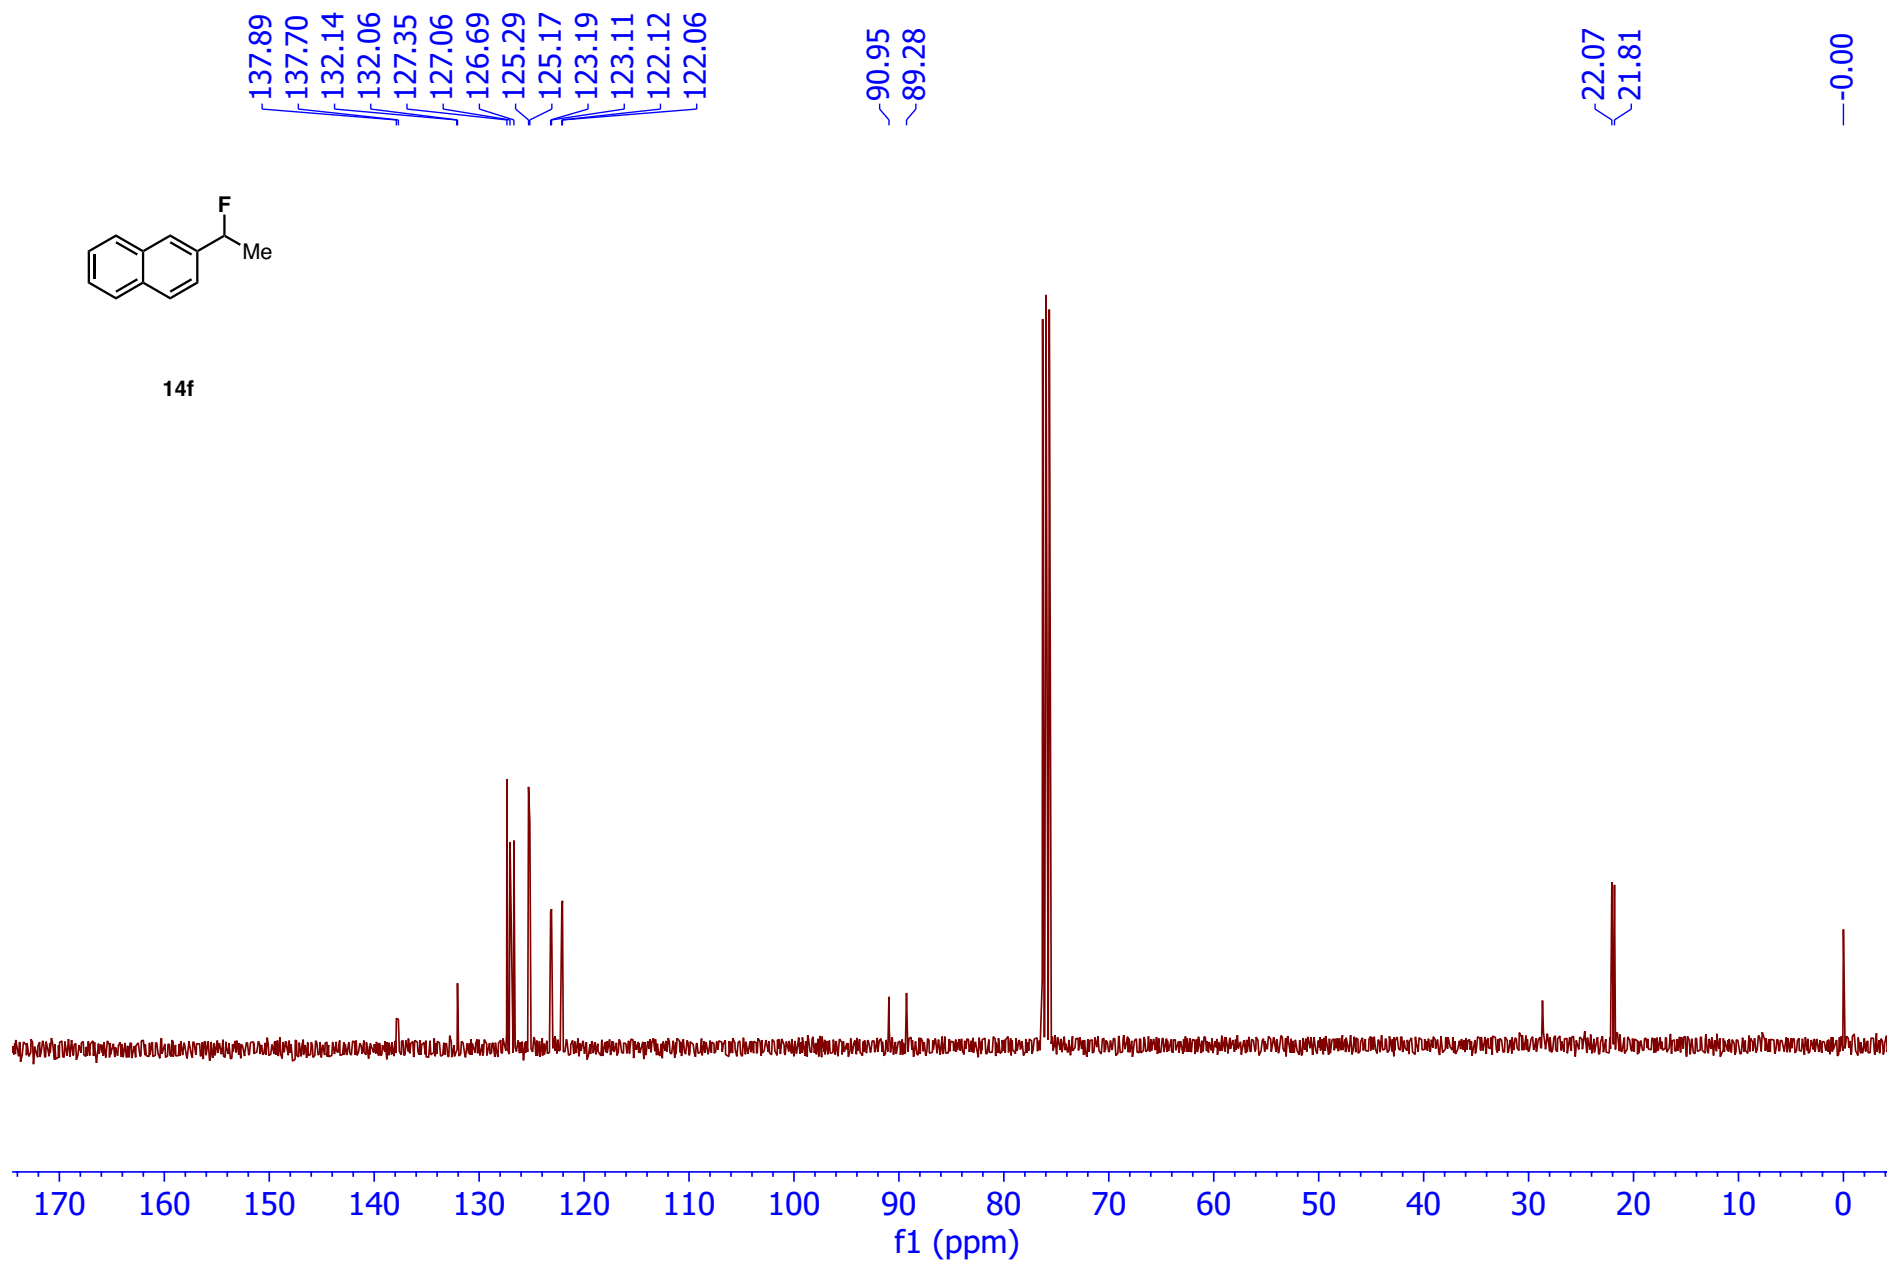

<sup>13</sup>C NMR of 14f



376MHz, Chloroform-d

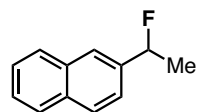

14f

-166.97  
-166.98  
-166.99  
-167.03  
-168.49

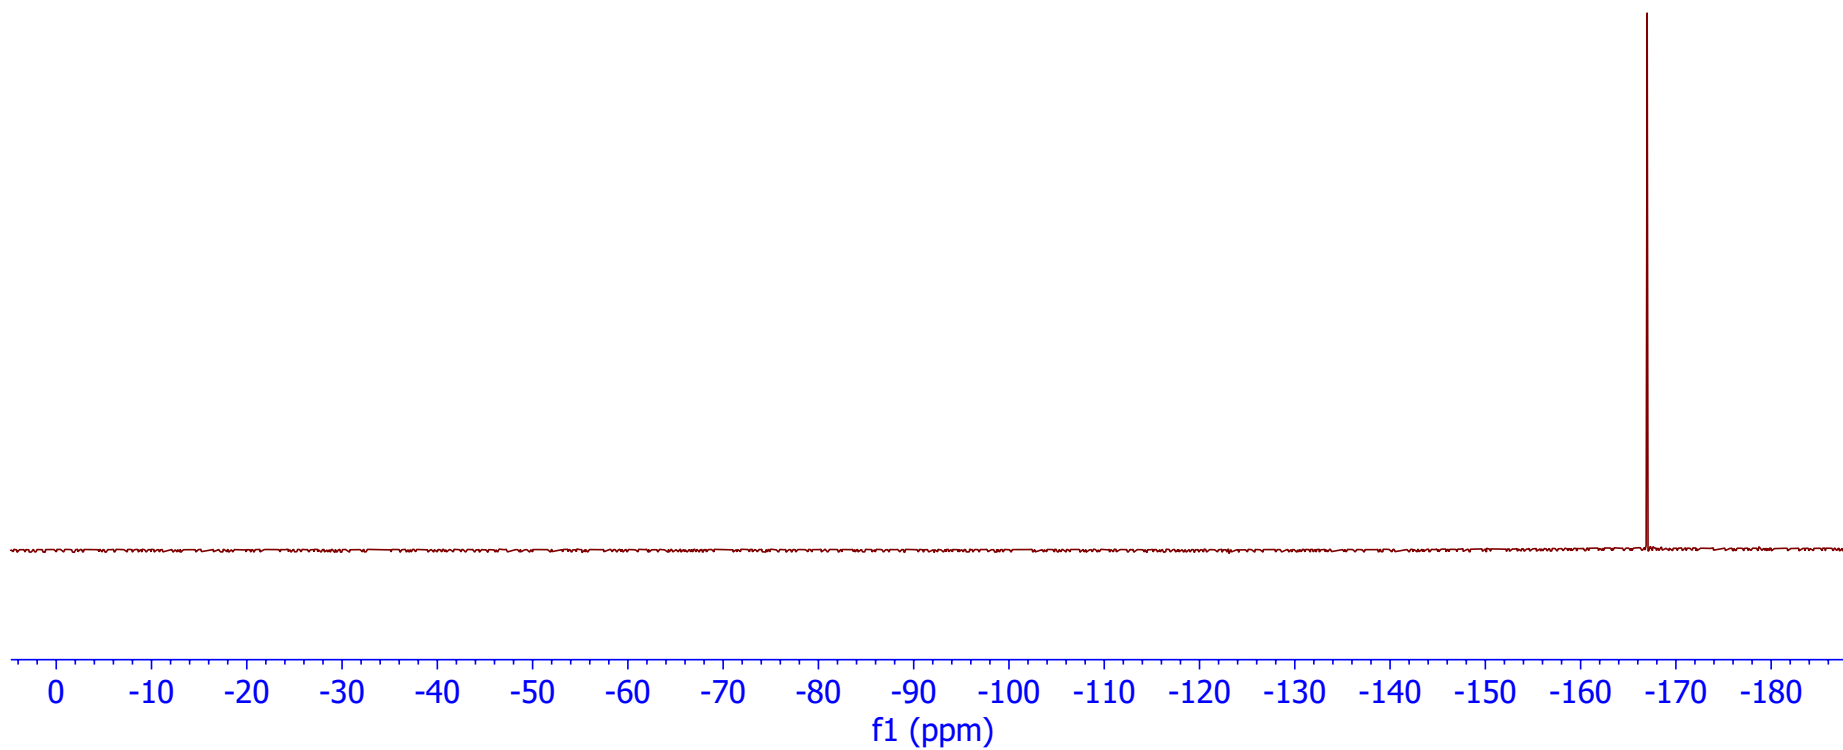

$^{19}\text{F}$  NMR of 14f

400 HMz, Chloroform-d

7.88  
7.86  
7.86  
7.85  
7.84  
7.83  
7.83  
7.53  
7.52  
7.51  
7.50  
7.49  
7.49  
7.47

5.60  
5.48

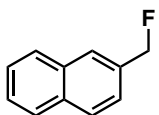

14g

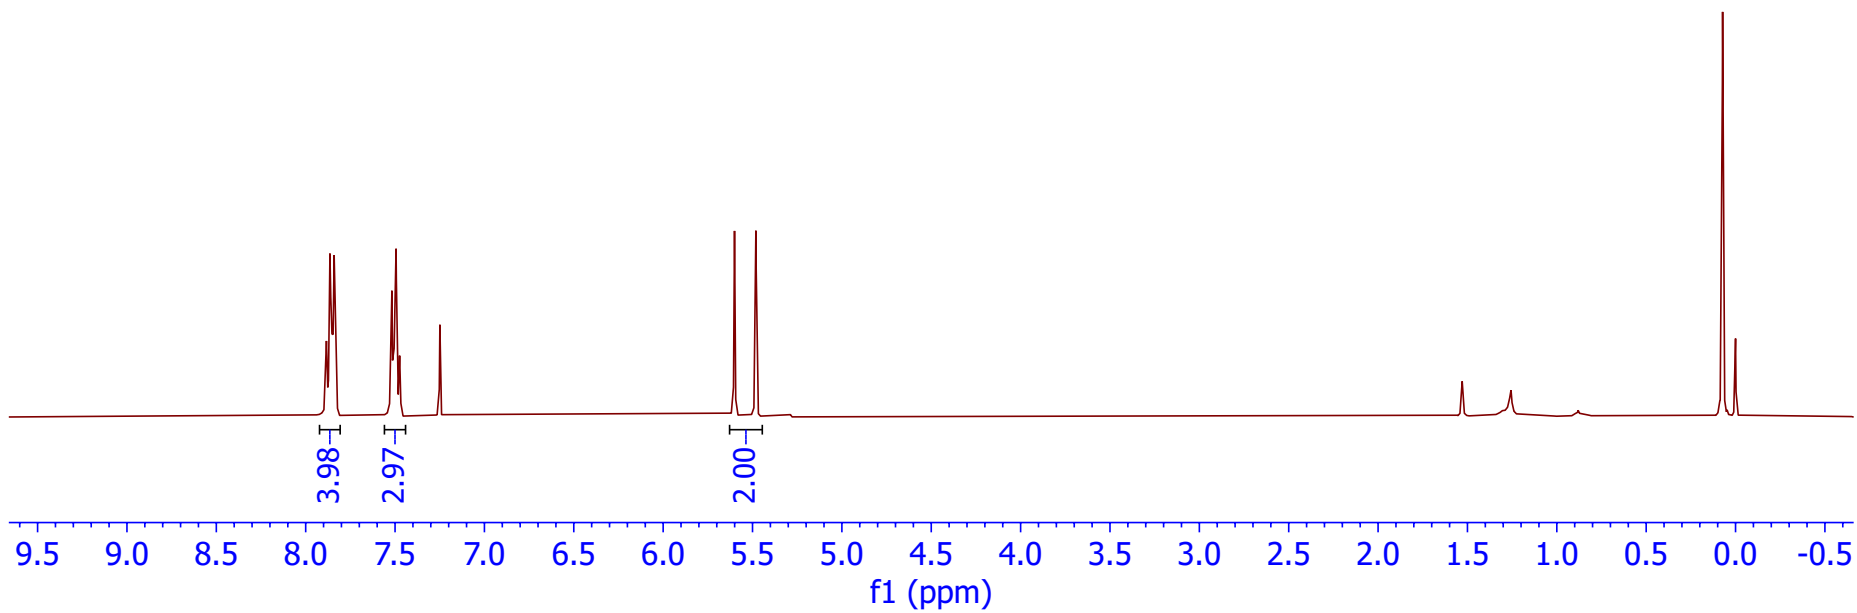

<sup>1</sup>H NMR of 14g

101 MHz, Chloroform-d

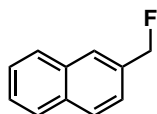

14g

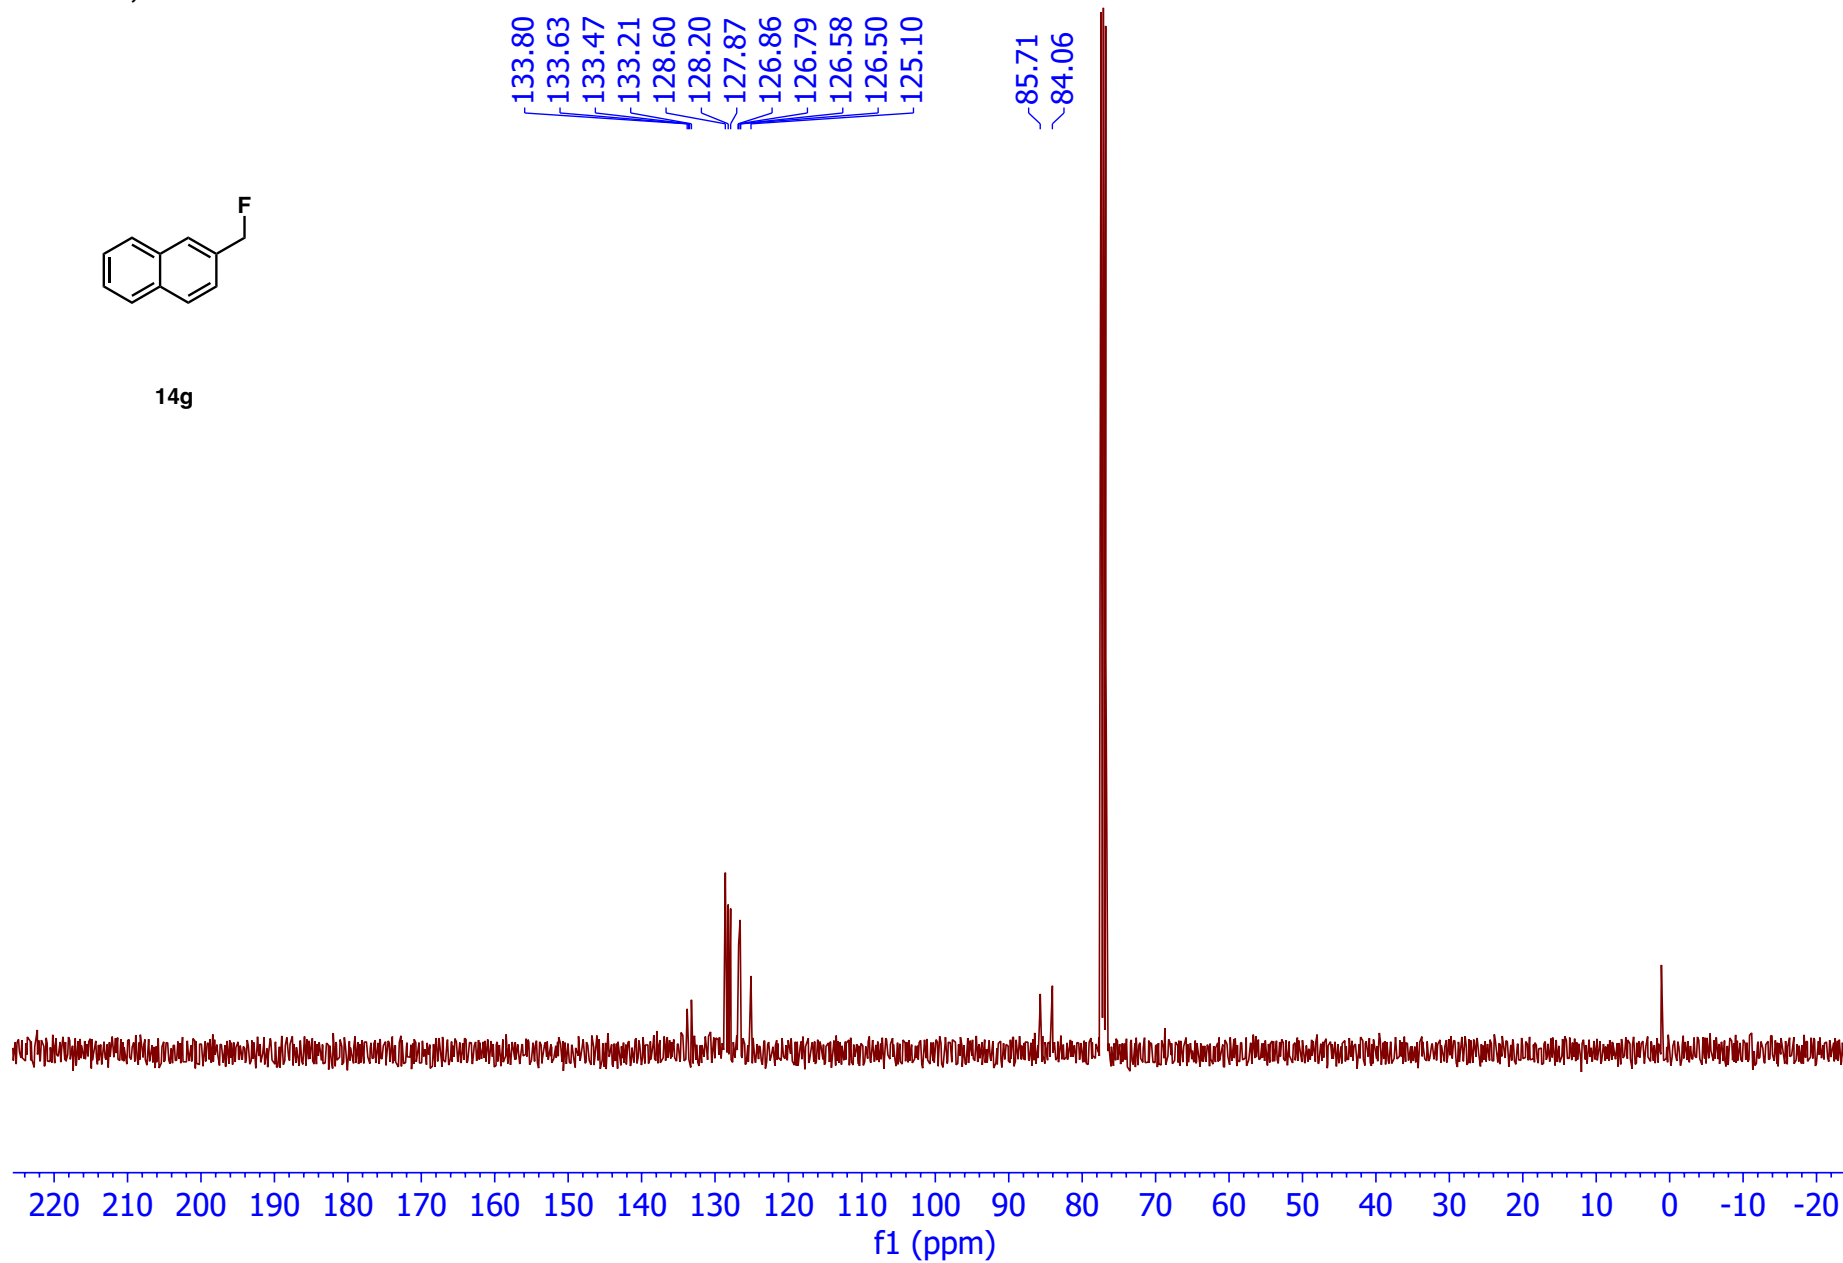

<sup>13</sup>C NMR of 14g

376MHz, Chloroform-d

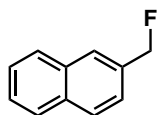

14g

-206.55  
-206.62  
-206.76  
-206.82  
-206.89  
-207.03  
-207.09

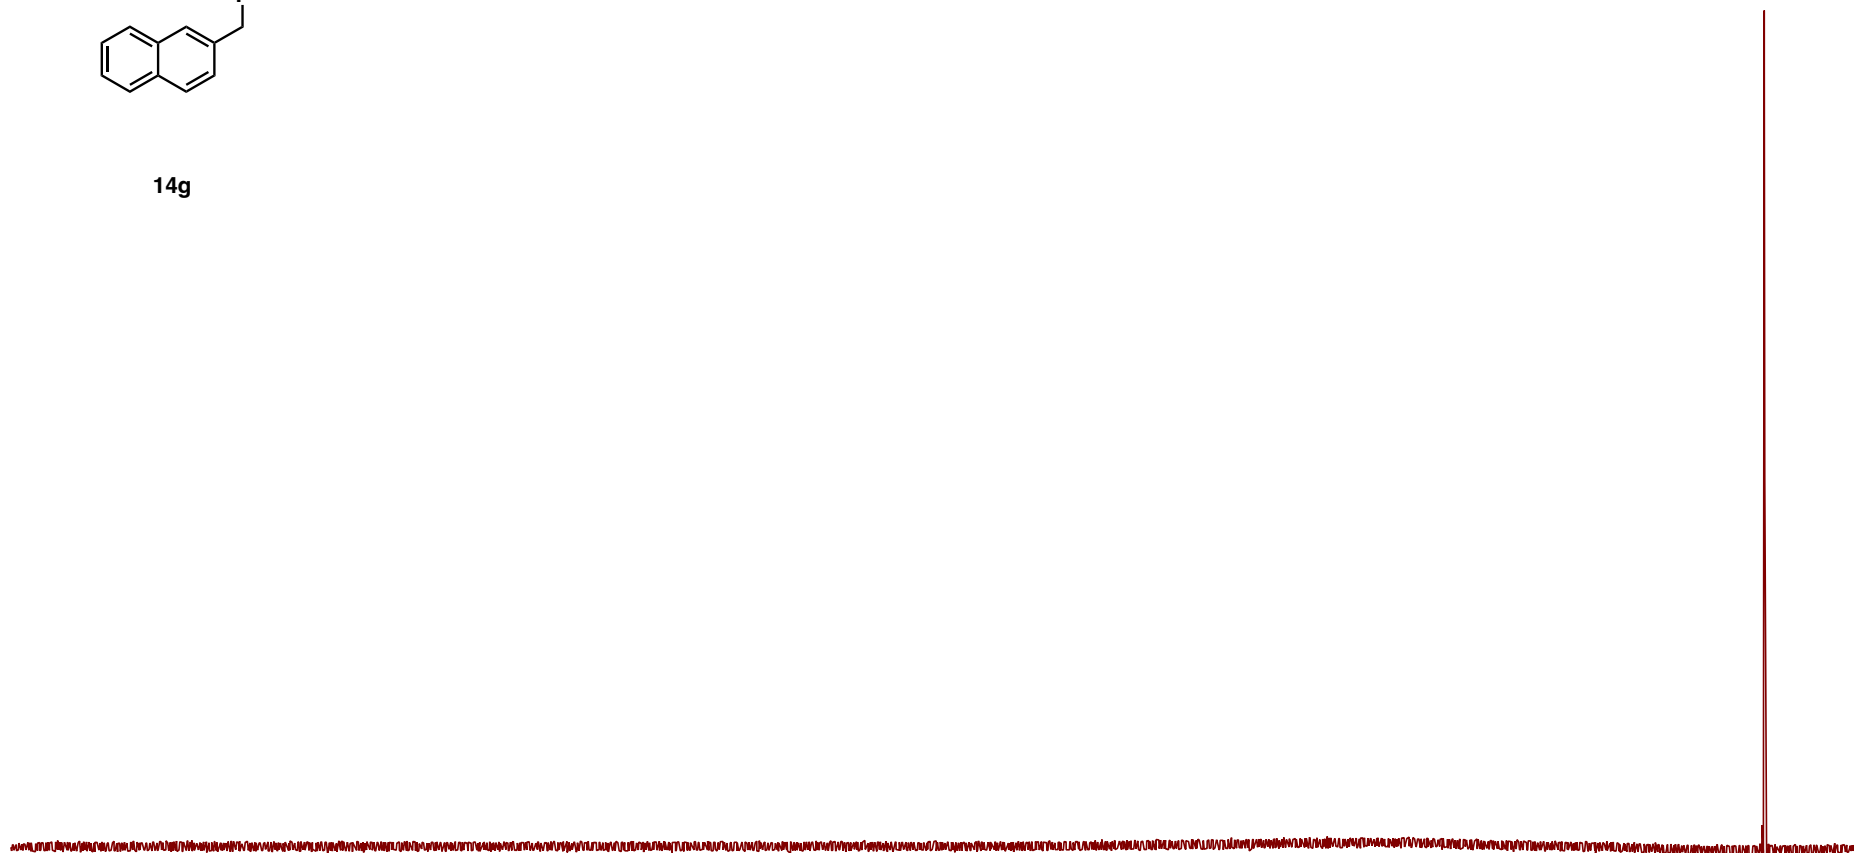

$^{19}\text{F}$  NMR of 14g

400 HMz, Chloroform-d

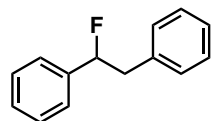

14h

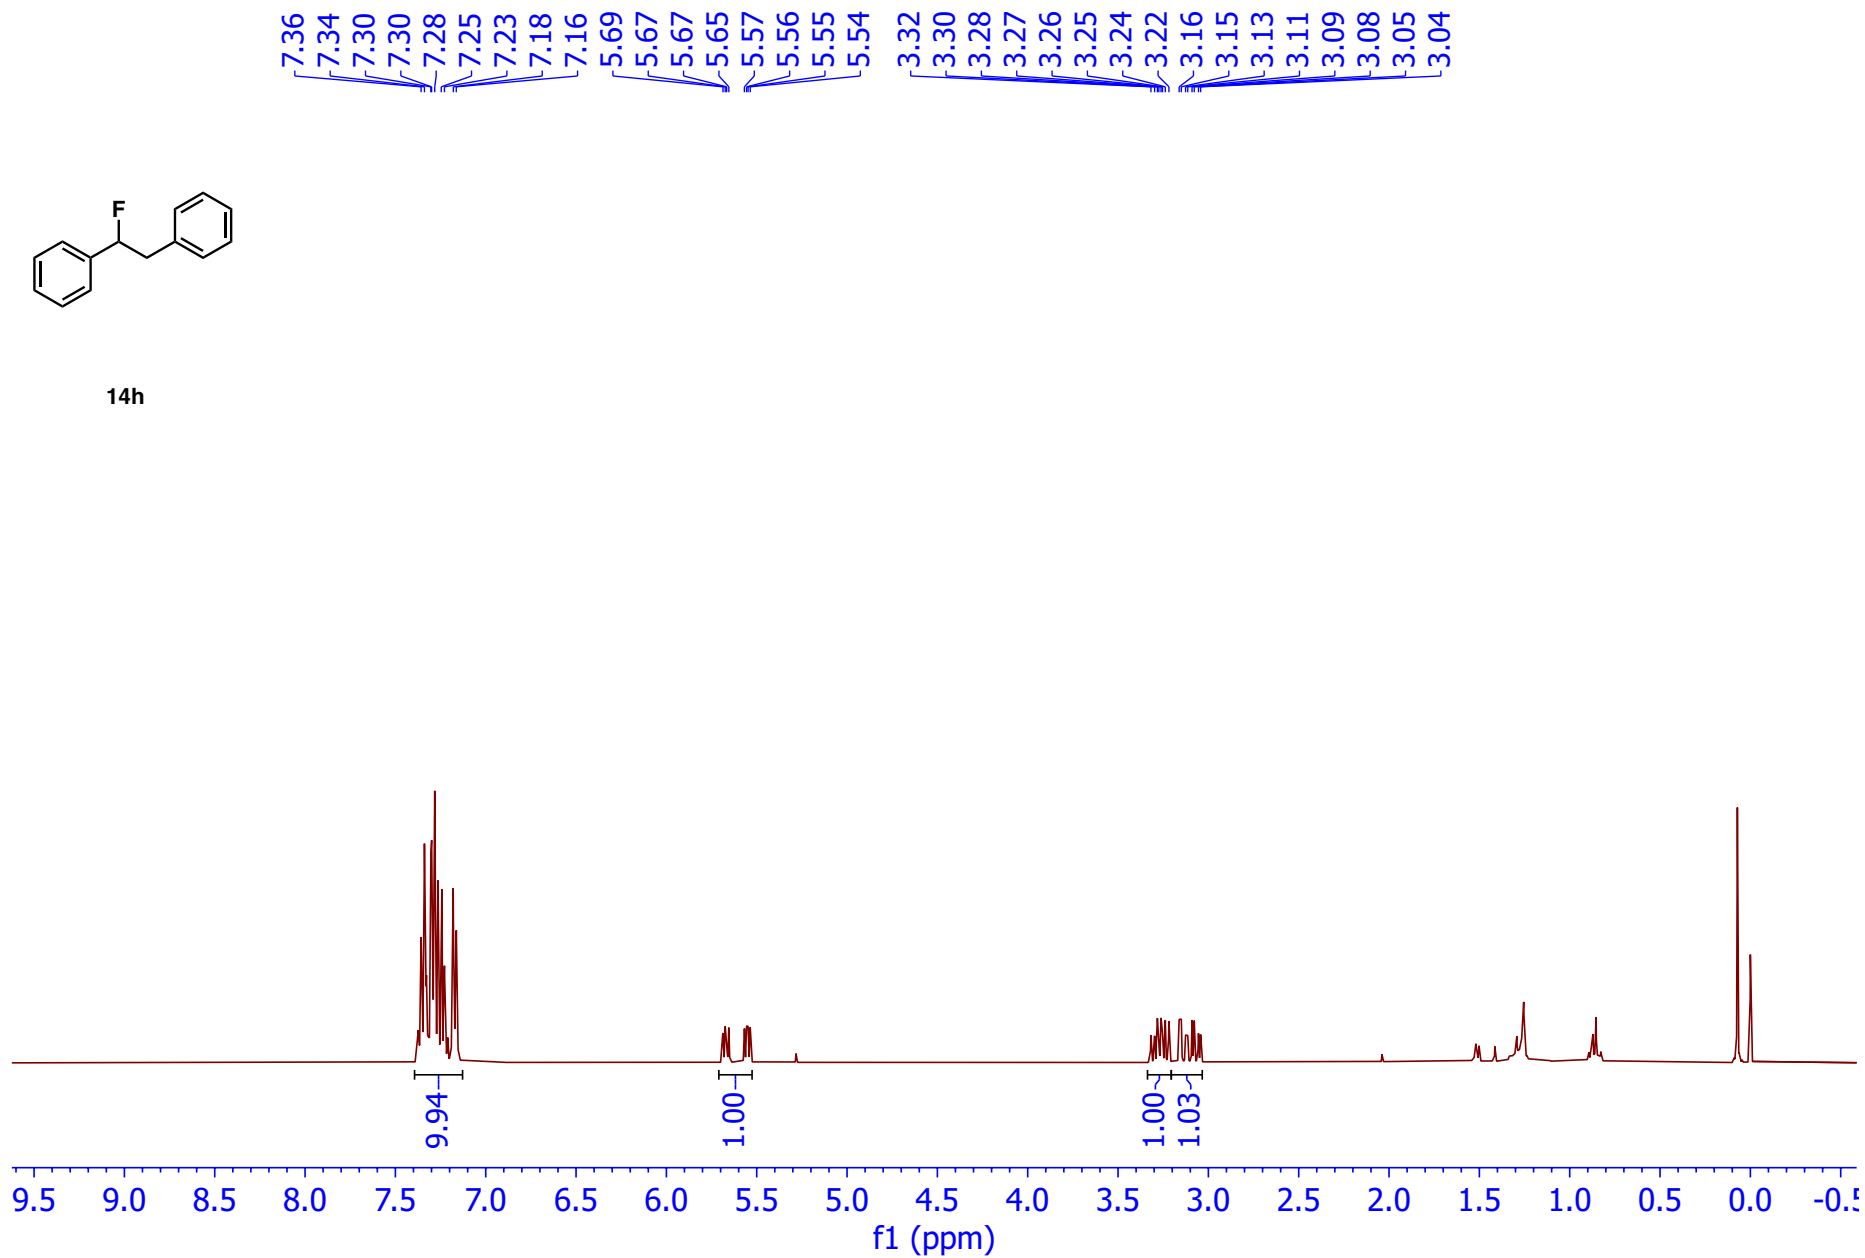

<sup>1</sup>H NMR of 14h

101 MHz, Chloroform-d



14h

138.86  
138.66  
135.68  
135.64  
128.49  
127.36  
127.35  
127.33  
125.67  
124.67  
124.60

94.74  
94.71  
93.01  
92.98

43.04  
42.80

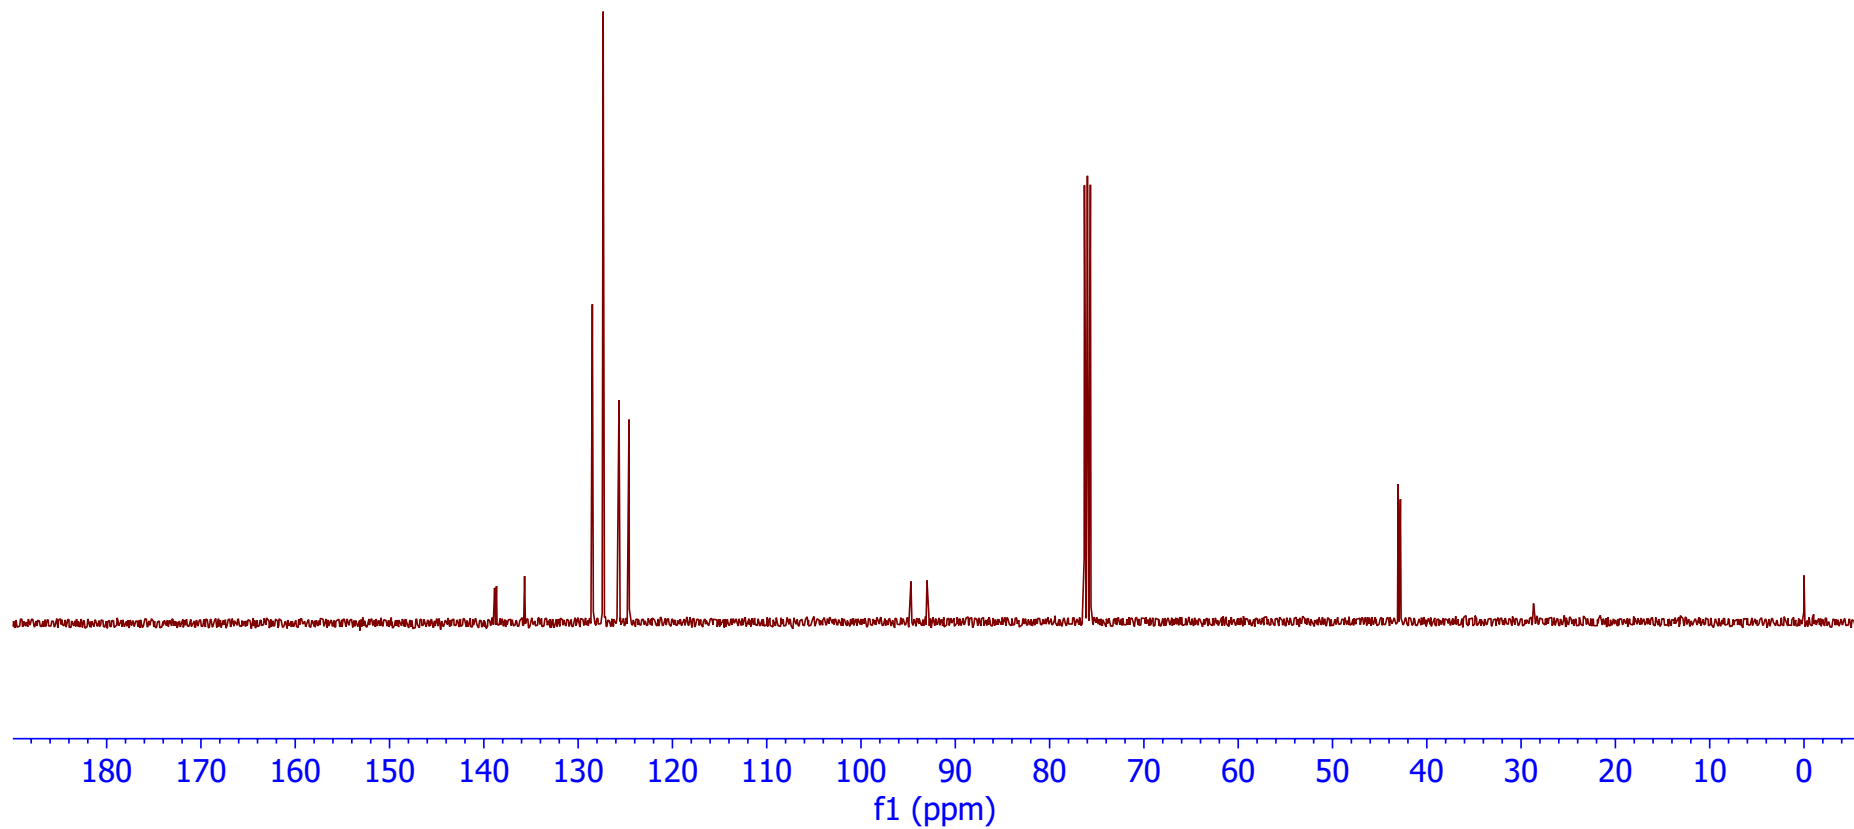

<sup>13</sup>C NMR of 14h

376MHz, Chloroform-d



14h

173.04  
173.15  
173.17  
173.20  
173.21  
186.66

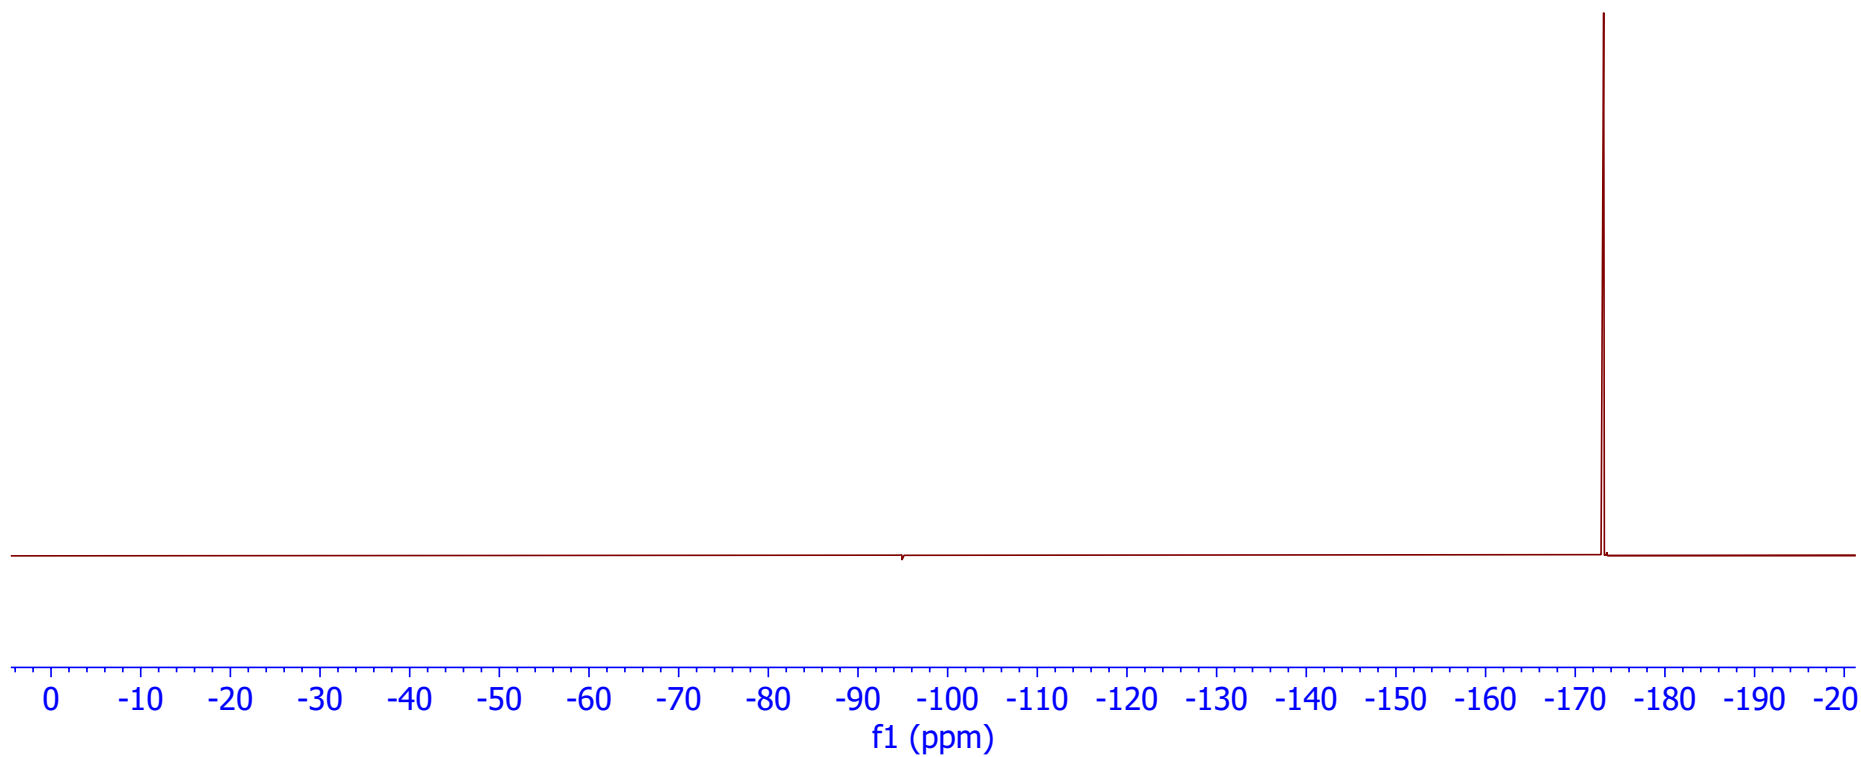

<sup>19</sup>F NMR of 14h

400 HMz, Chloroform-d

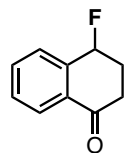

14i

8.27  
8.07  
8.05  
7.66  
7.64  
7.62  
7.57  
7.55  
7.53  
7.51  
7.49

5.81  
5.80  
5.79  
5.66

3.65  
3.01  
2.99  
2.96  
2.95  
2.93  
2.68  
2.66  
2.65  
2.64  
2.62  
2.61  
2.52  
2.50  
2.49  
2.46  
2.45  
2.43

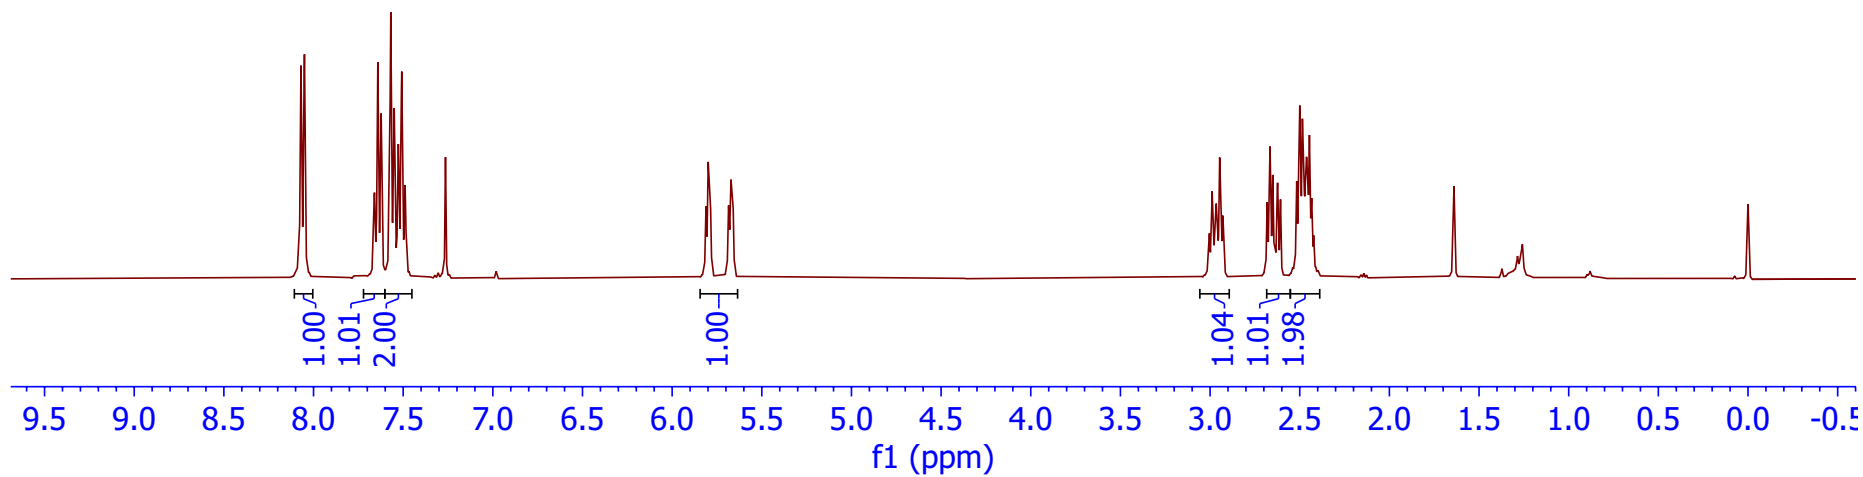

<sup>1</sup>H NMR of 14i



101 MHz, Chloroform-d



14i

196.68

140.33  
140.15  
134.24  
131.48  
129.80  
129.77  
128.16  
128.10  
127.22

88.65  
86.94

34.03  
33.96  
29.80  
29.45  
29.23

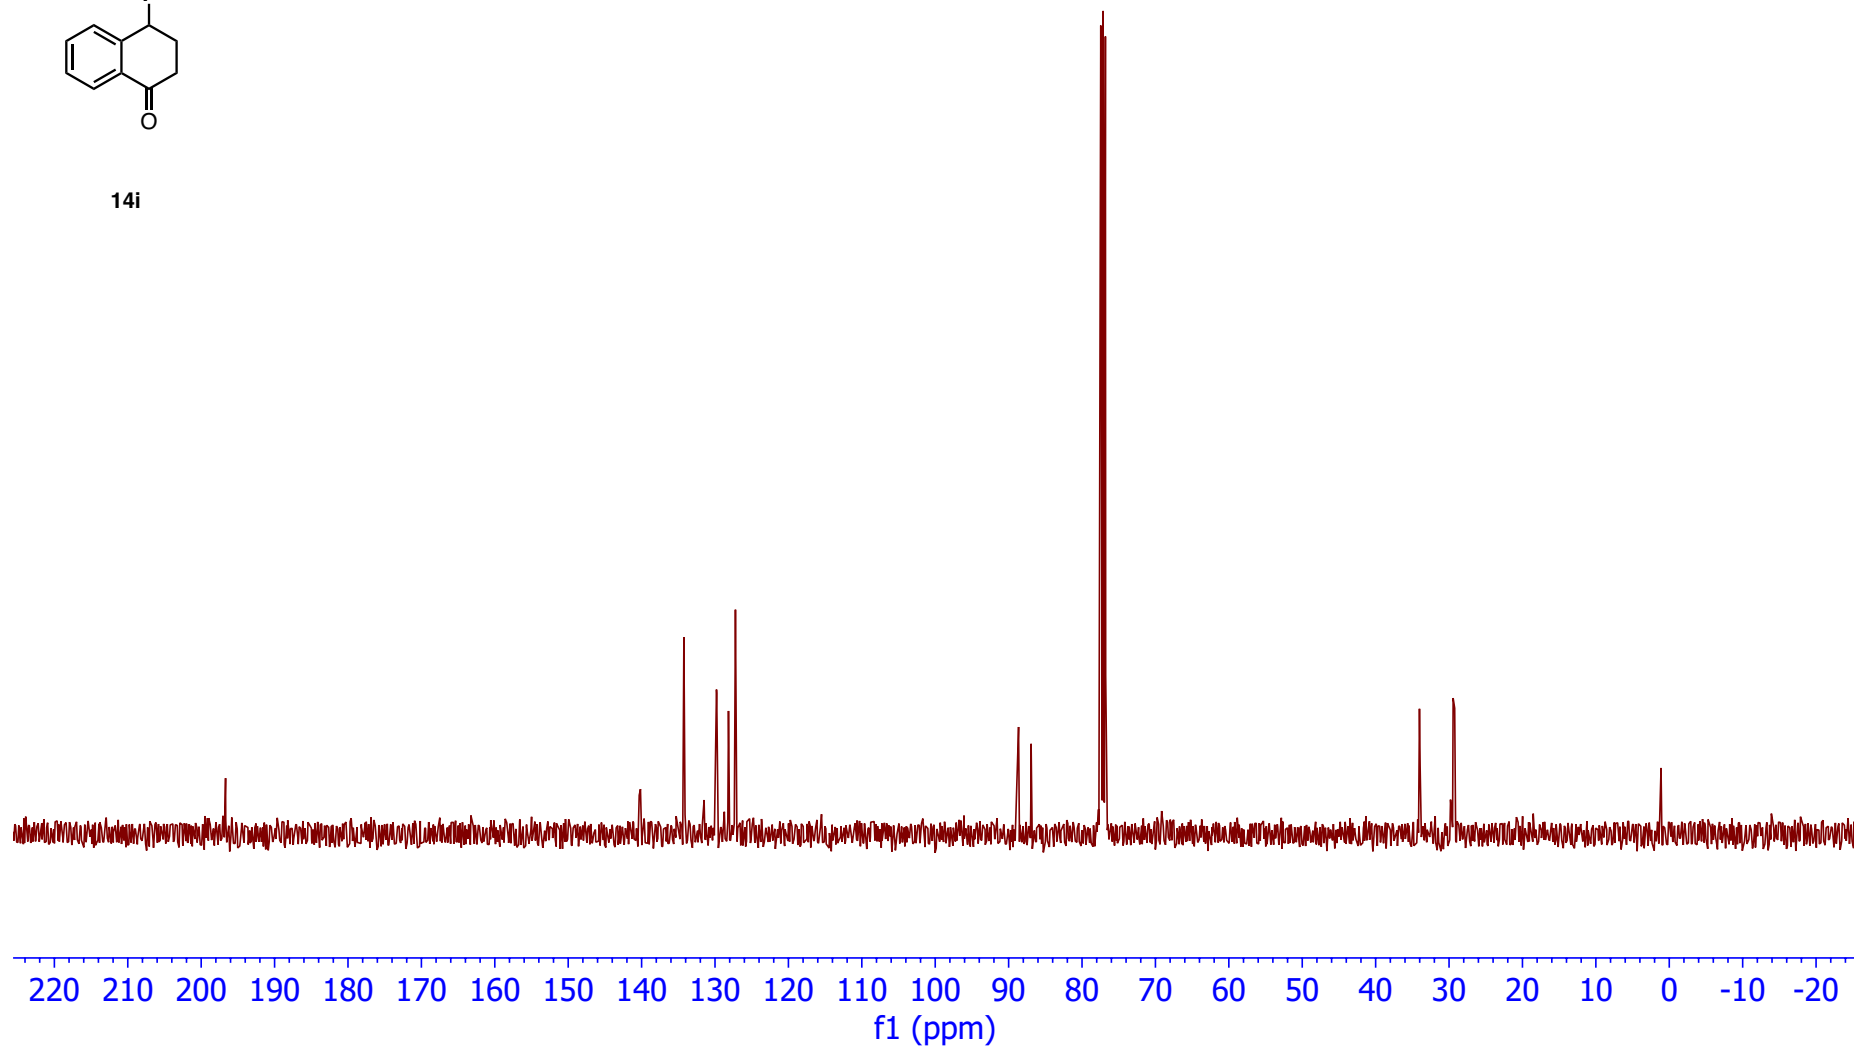

<sup>13</sup>C NMR of 14i

376MHz, Chloroform-d

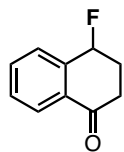

14i

170.31  
170.35  
170.36  
170.40  
170.44  
170.49  
170.53

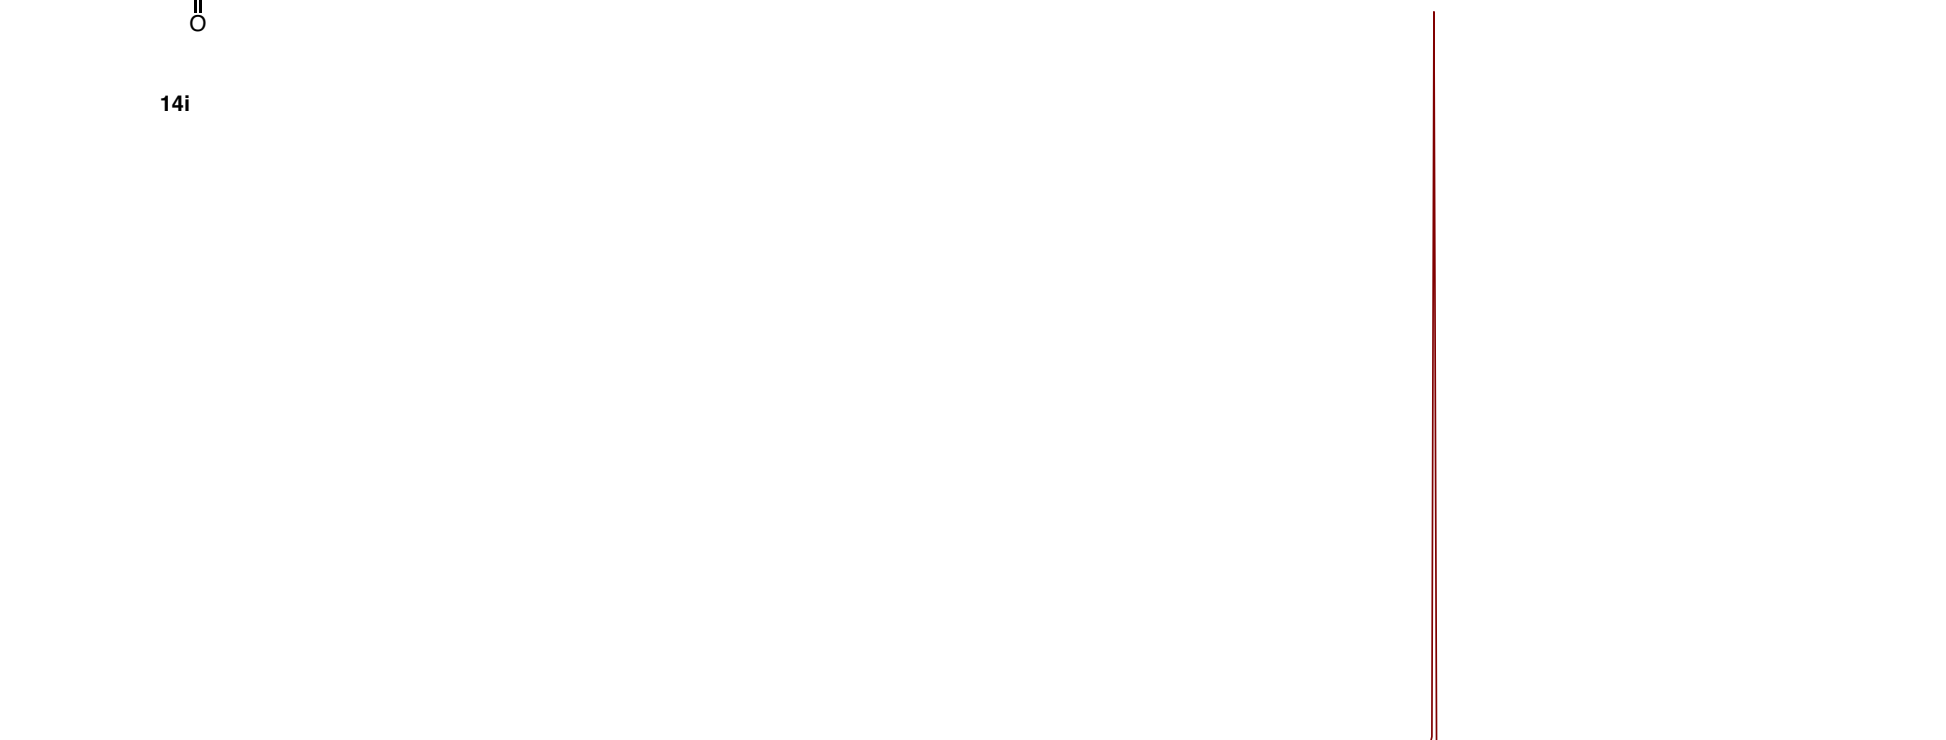

50 30 10 -10 -30 -50 -70 -90 -110 -130 -150 -170 -190 -210 -230 -250  
f1 (ppm)

$^{19}\text{F}$  NMR of 14i

400 HMz, Chloroform-d

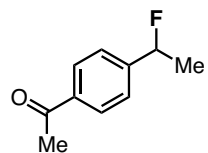

14j

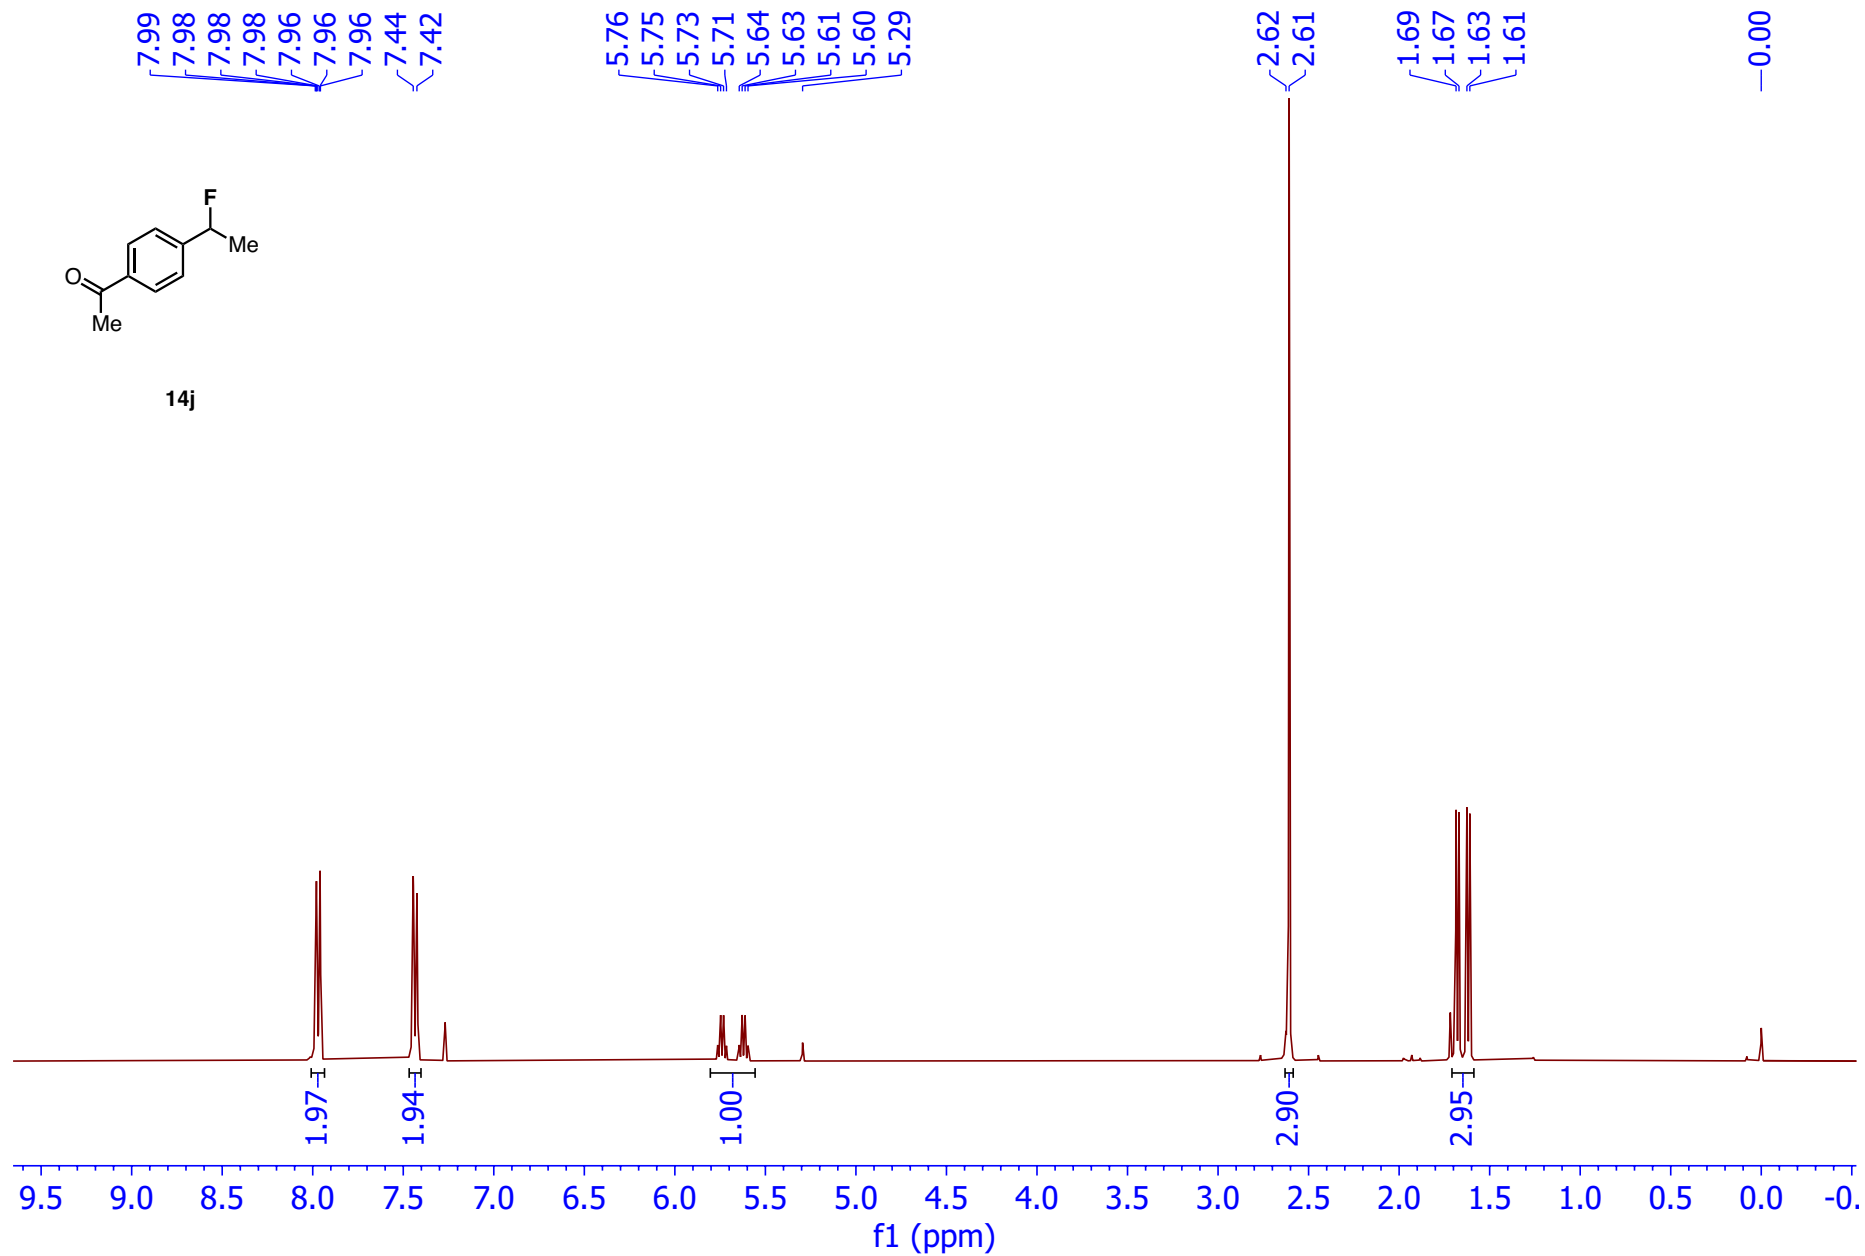

<sup>1</sup>H NMR of 14j

101 MHz, Chloroform-d

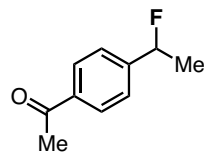

14j

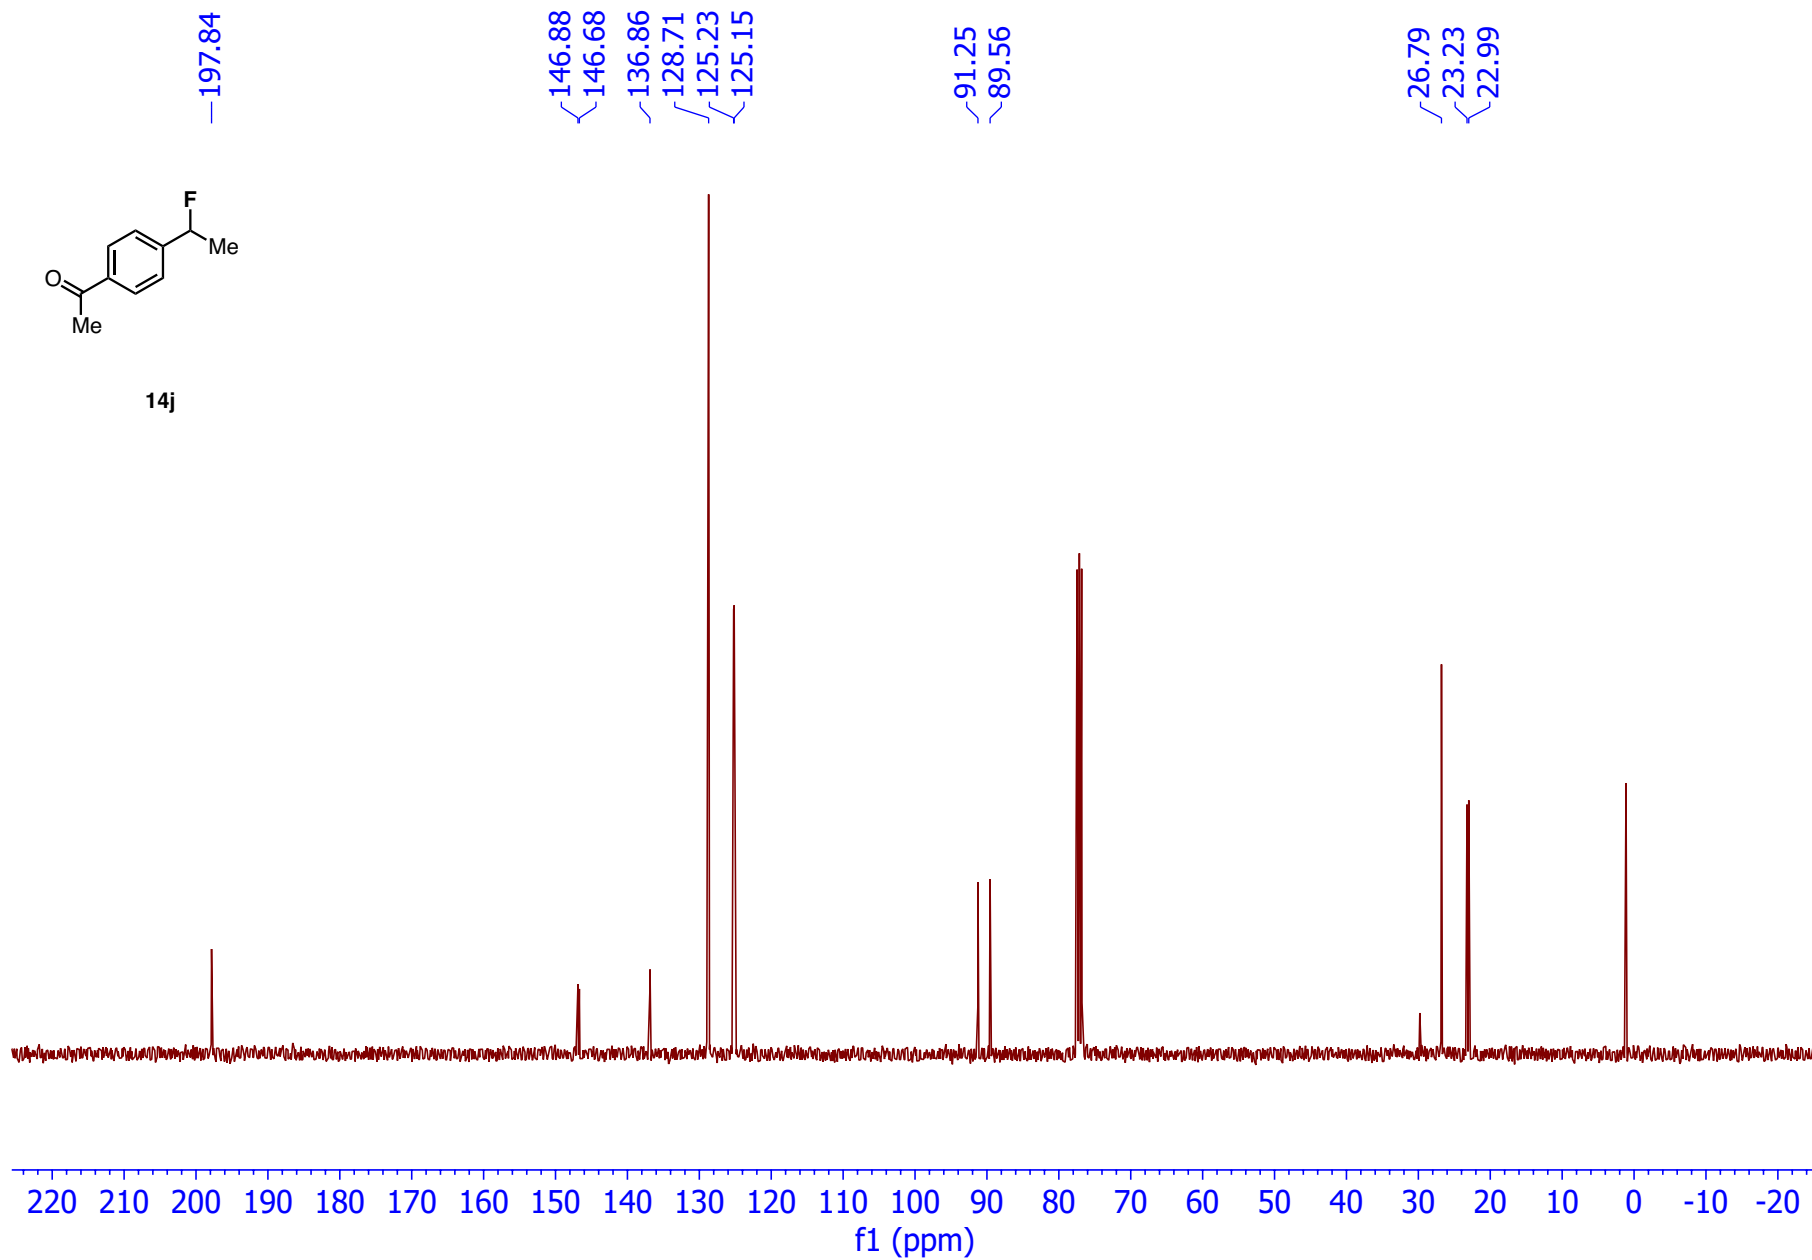

<sup>13</sup>C NMR of 14j

376MHz, Chloroform-d

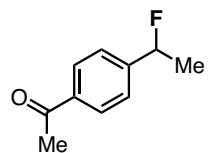

14j

-171.09  
-171.16  
-171.22  
-171.28  
-171.35  
-171.41

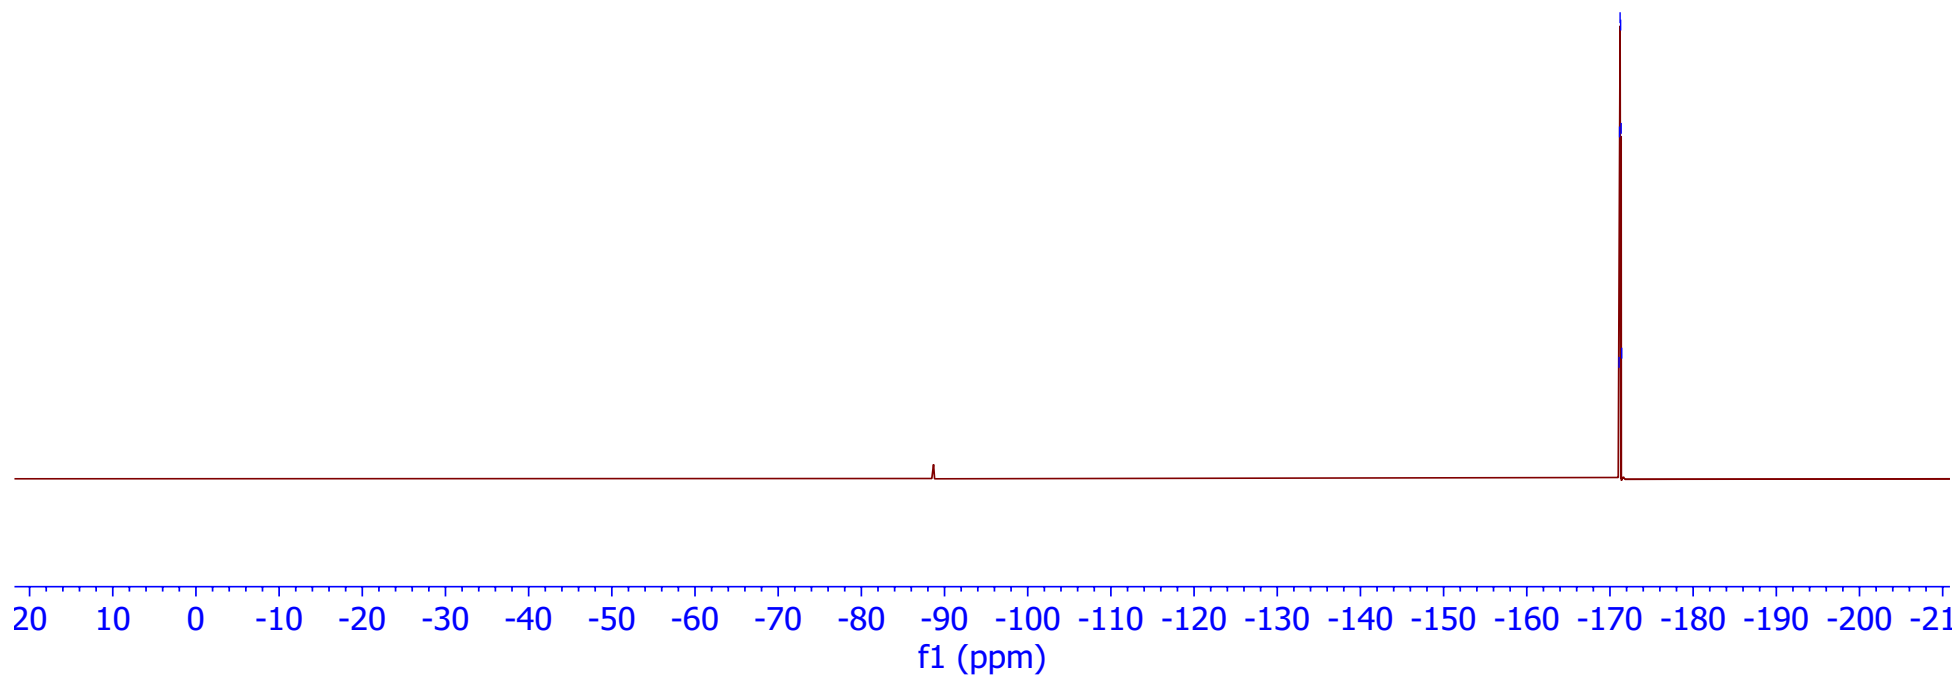

<sup>19</sup>F NMR of 14j

400 HMz, Chloroform-d

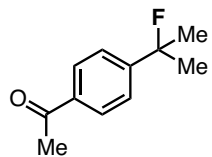

14k

7.96  
7.95  
7.94  
7.48  
7.48  
7.47  
7.46

2.63  
2.61

1.74  
1.72  
1.69  
1.67

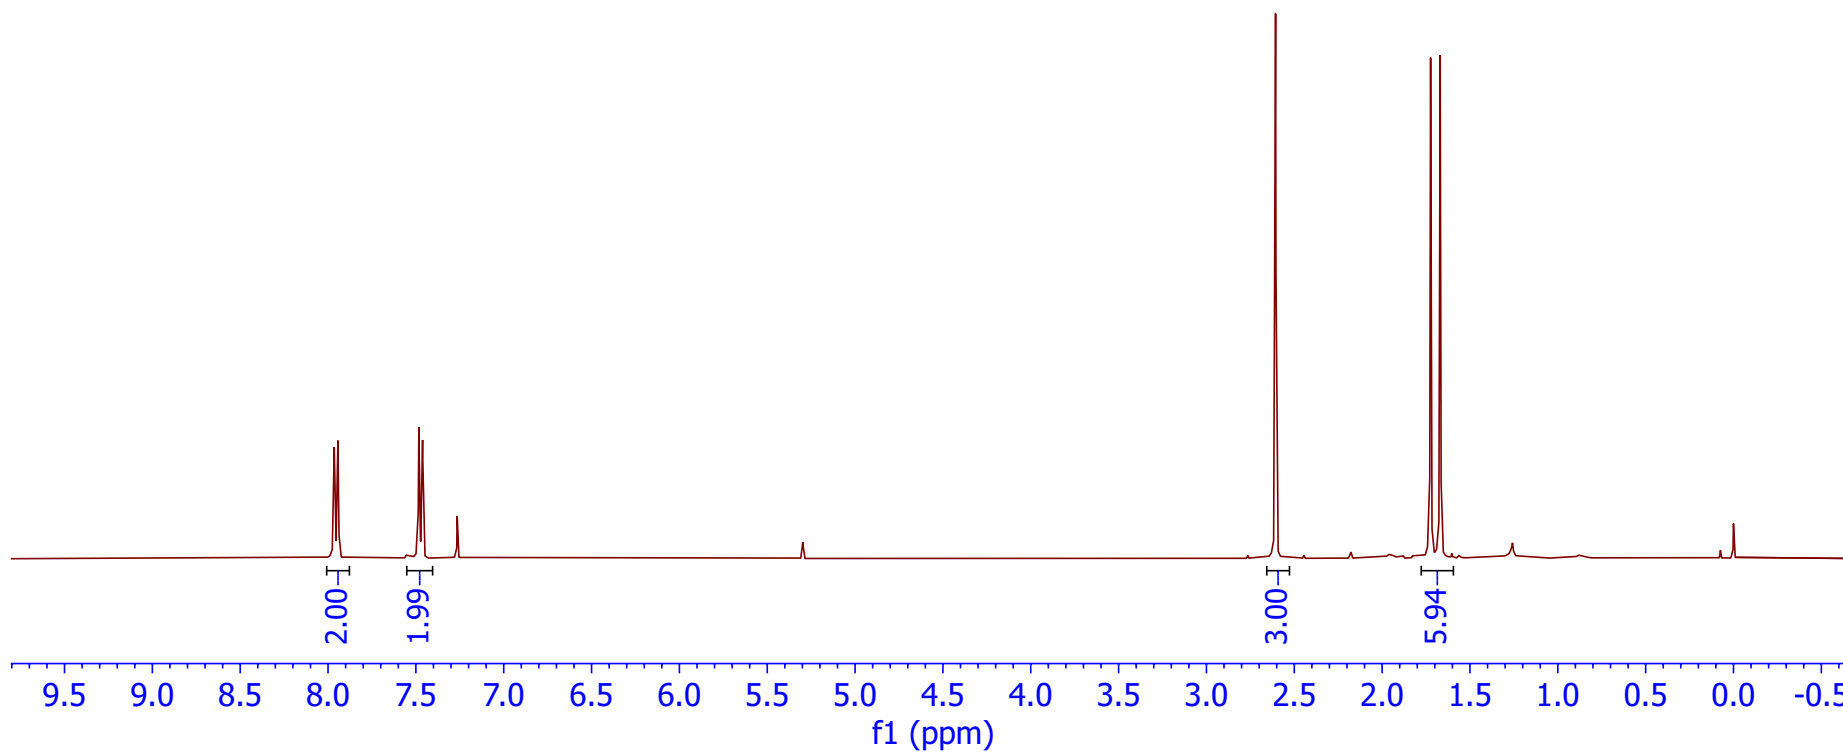

<sup>1</sup>H NMR of 14k

376MHz, Chloroform-d



14k

-138.79  
-138.84  
-138.89  
-138.92  
-138.94  
-138.96  
-138.99  
-139.01  
-139.04  
-139.09

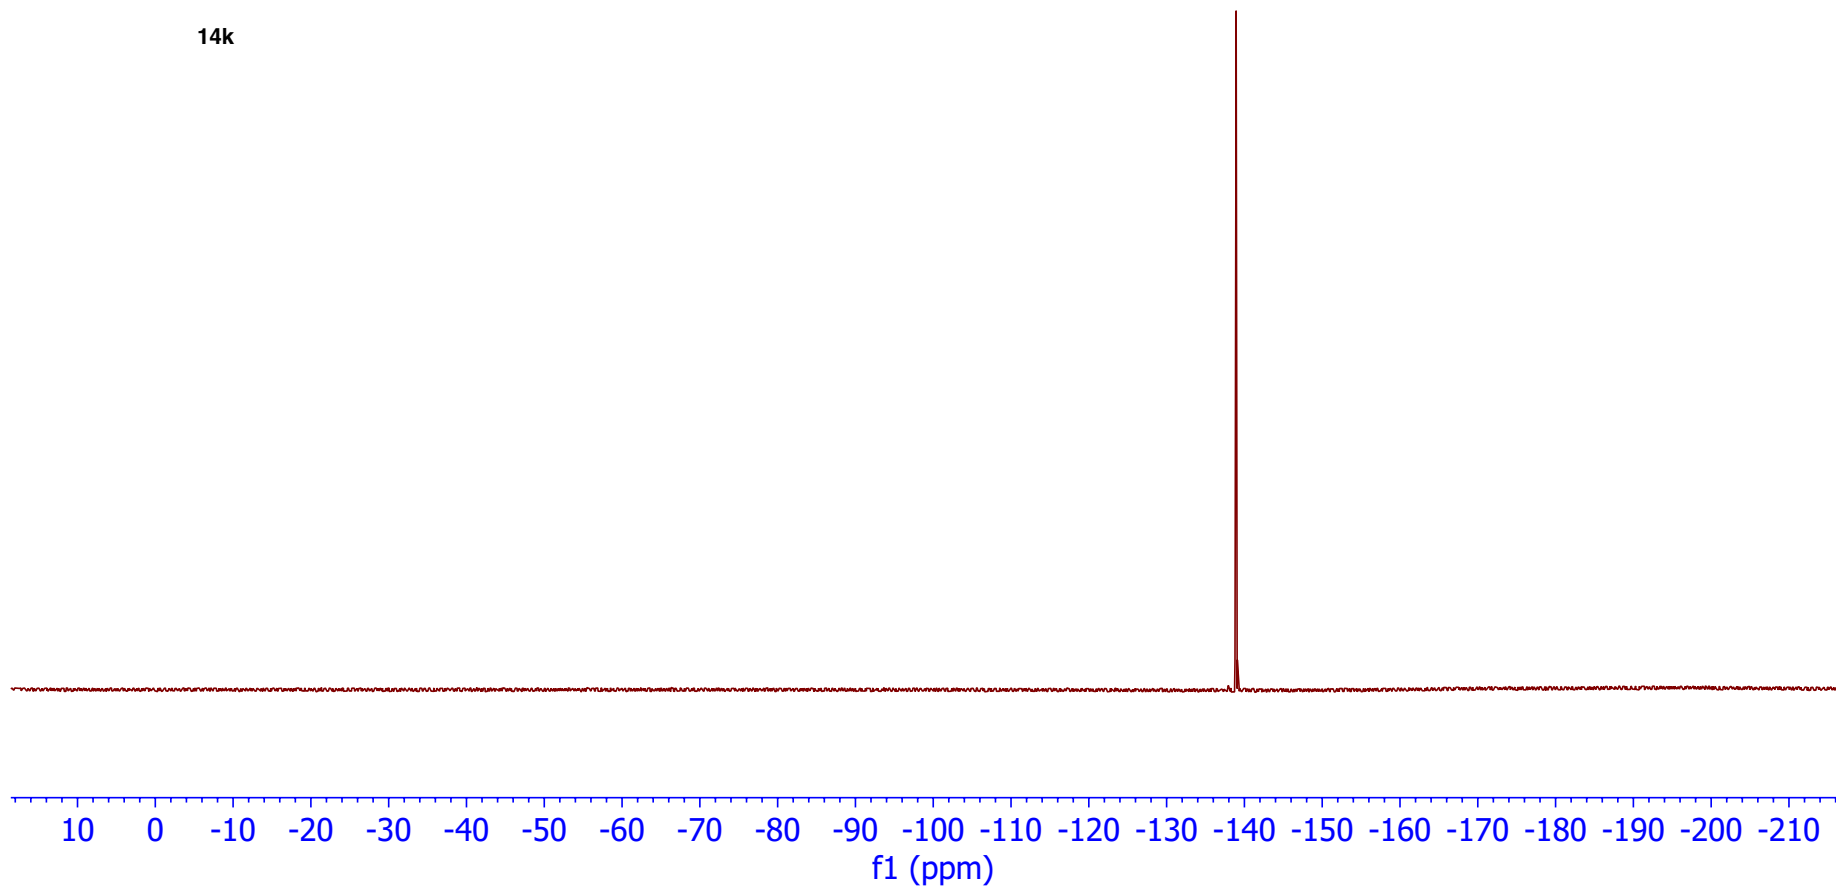

<sup>19</sup>F NMR of 14k

400 HMz, Chloroform-d

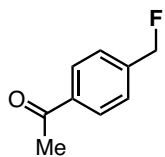

14l

8.04  
8.02  
7.99  
7.99  
7.98  
7.97  
7.97  
7.97  
7.46  
7.46  
7.44  
7.44

5.50  
5.39

2.63  
2.62  
2.61

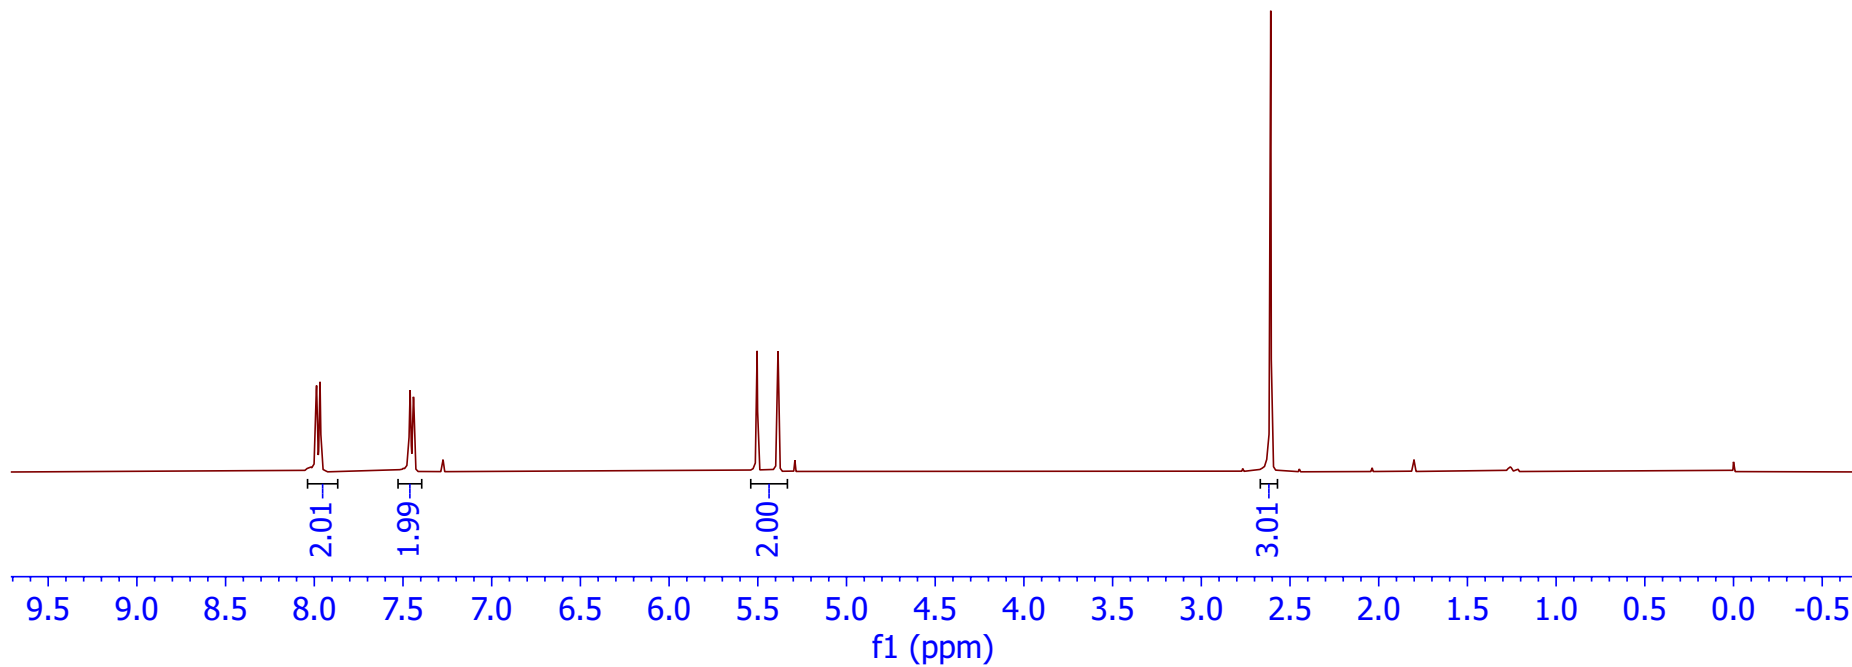

<sup>1</sup>H NMR of 14l



101 MHz, Chloroform-d

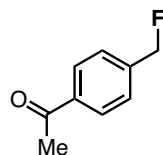

14I

197.76

141.53  
141.36  
137.21  
137.18  
128.70  
126.90  
126.84

84.56  
82.88

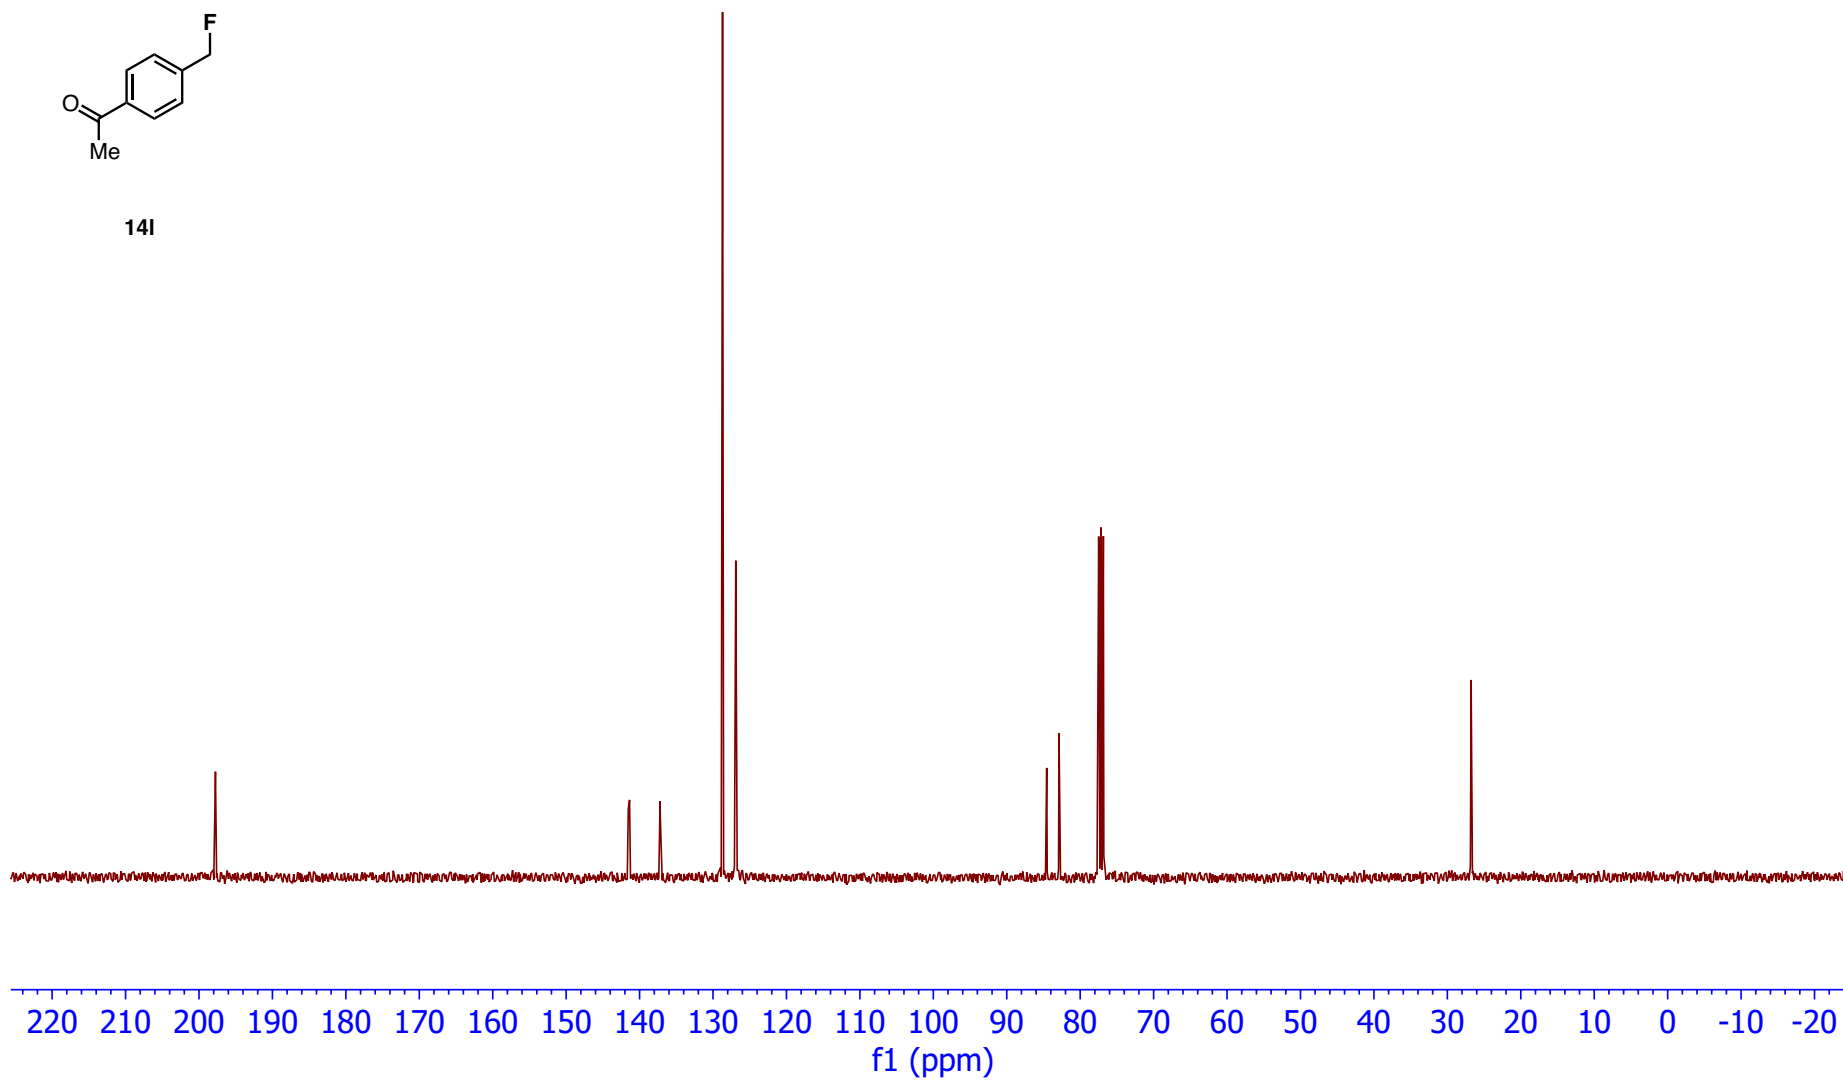

<sup>13</sup>C NMR of 14I

376MHz, Chloroform-d

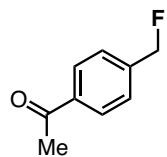

14I

-212.43  
-212.45  
-212.66  
-212.85  
-212.86  
-212.93  
-213.02  
-213.05  
-213.06  
-213.06  
-213.25  
-213.26  
-213.38

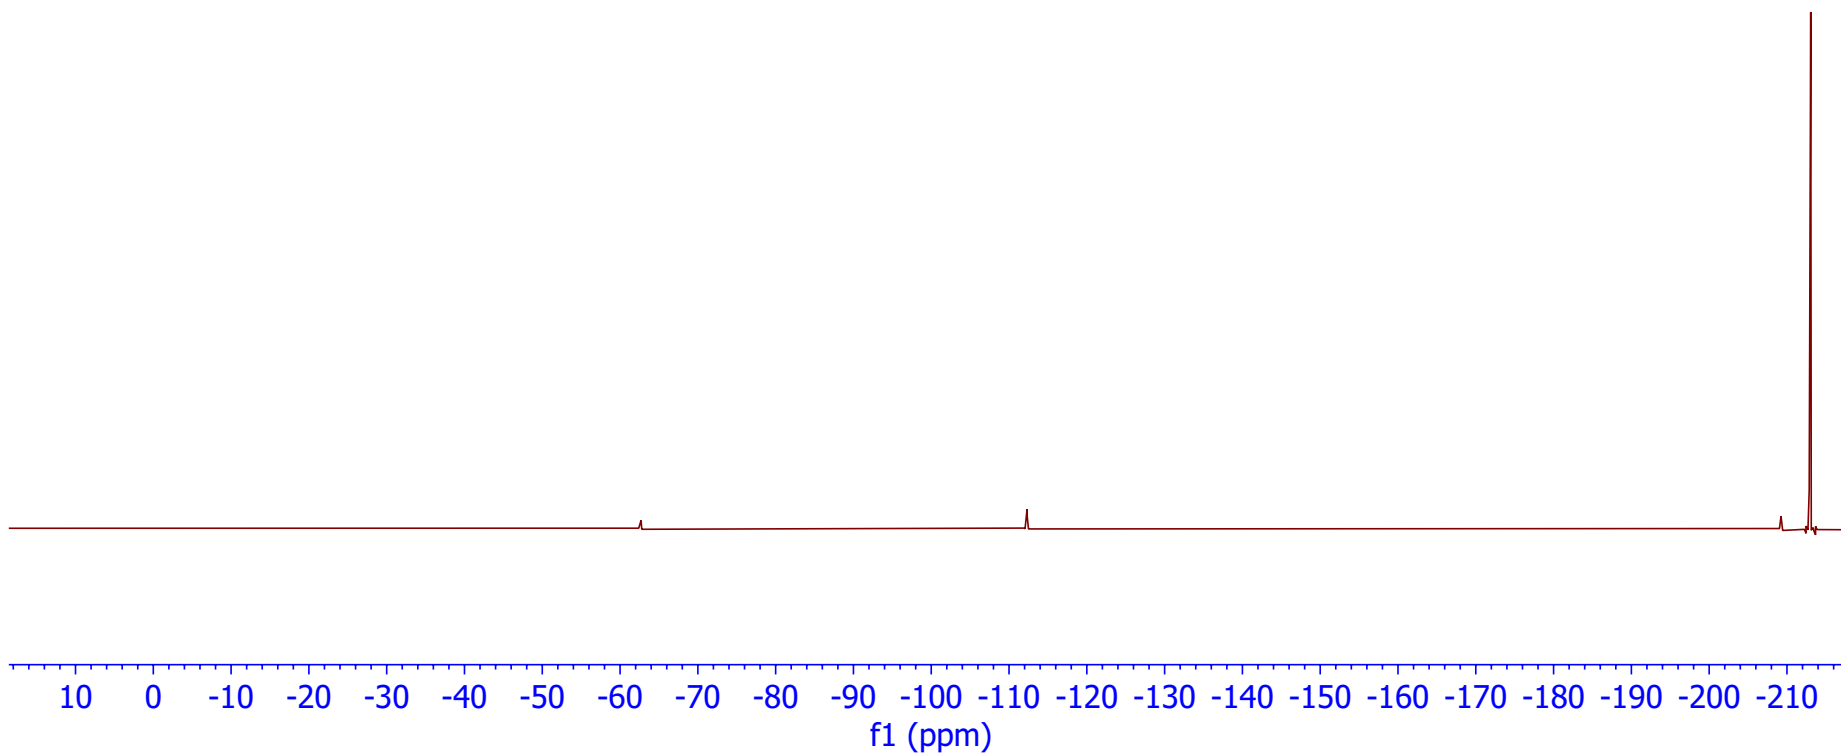

<sup>19</sup>F NMR of 14I

400 HMz, Chloroform-d

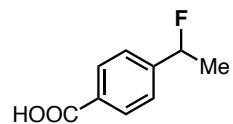

14m

8.14  
8.13  
8.12  
8.04  
7.46  
7.44

5.78  
5.77  
5.75  
5.74  
5.67  
5.65  
5.63  
5.62

1.70  
1.68  
1.64  
1.62

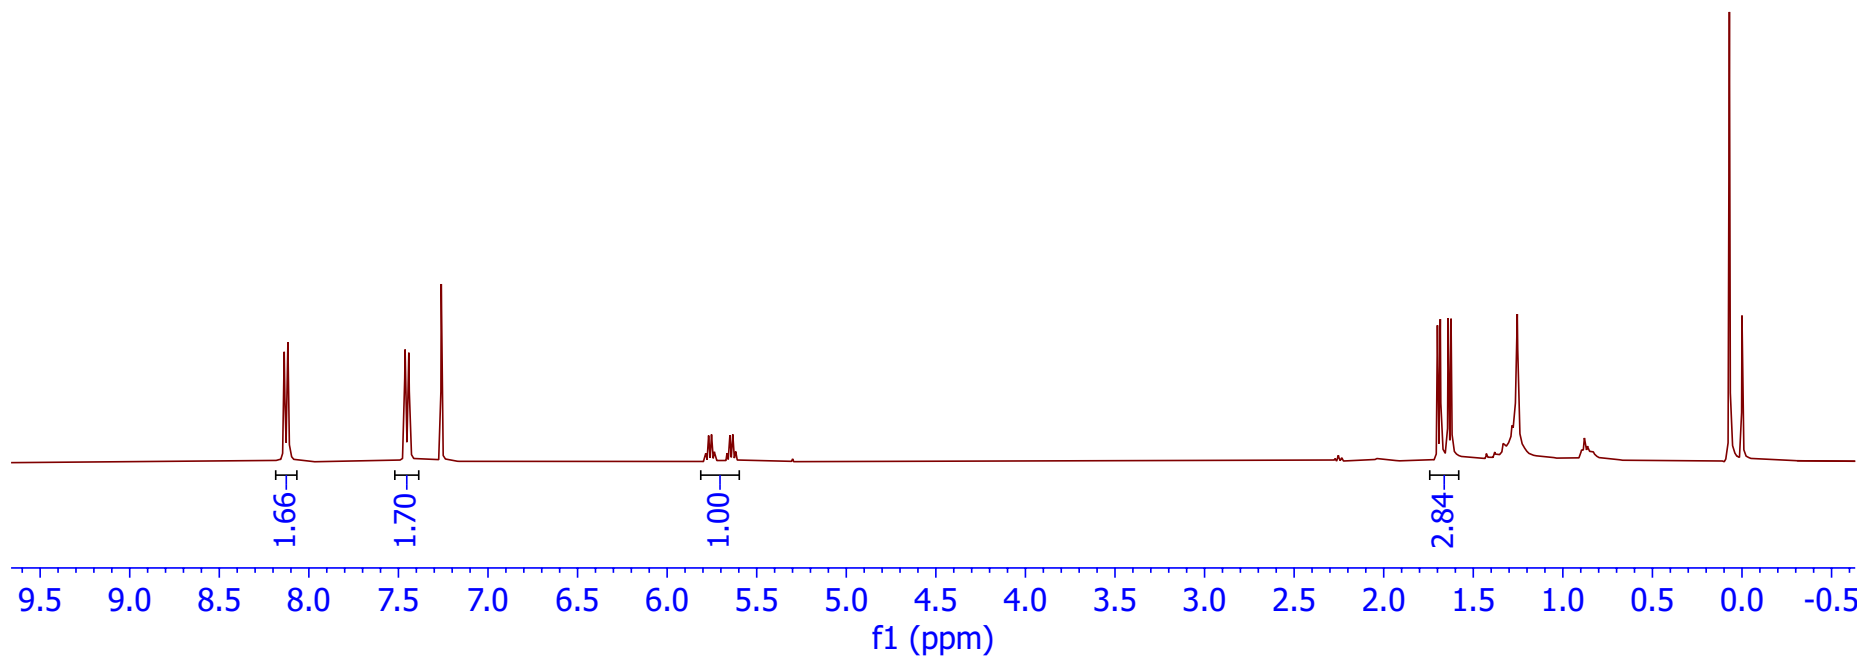

<sup>1</sup>H NMR of 14m

376MHz, Chloroform-d



14m

-171.65  
-171.66

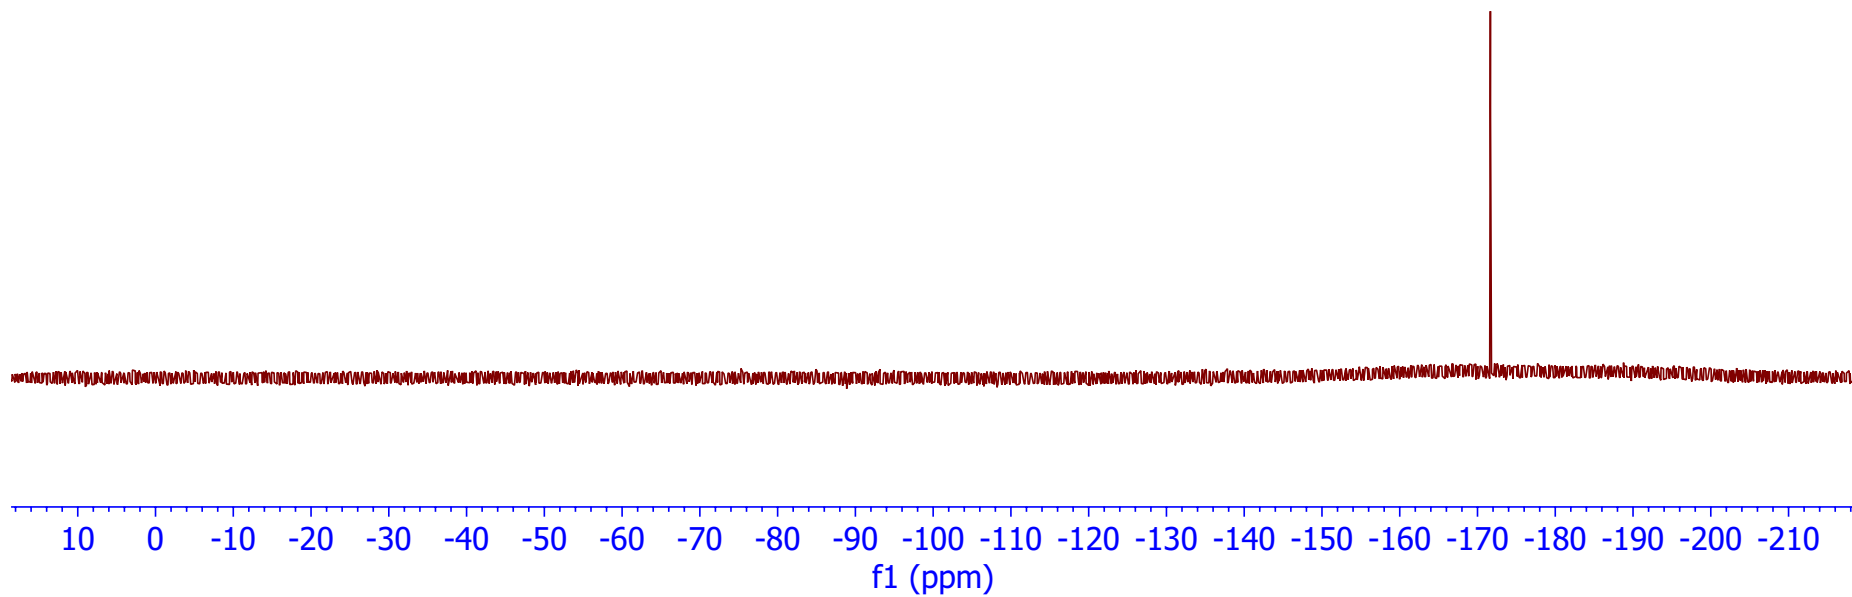

$^{19}\text{F}$  NMR of 14m

400 HMz, Chloroform-d

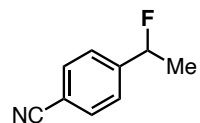

14n

7.62  
7.59  
7.39  
7.37

5.68  
5.67  
5.65  
5.63  
5.56  
5.55  
5.53  
5.52

1.61  
1.59  
1.55  
1.53  
1.18

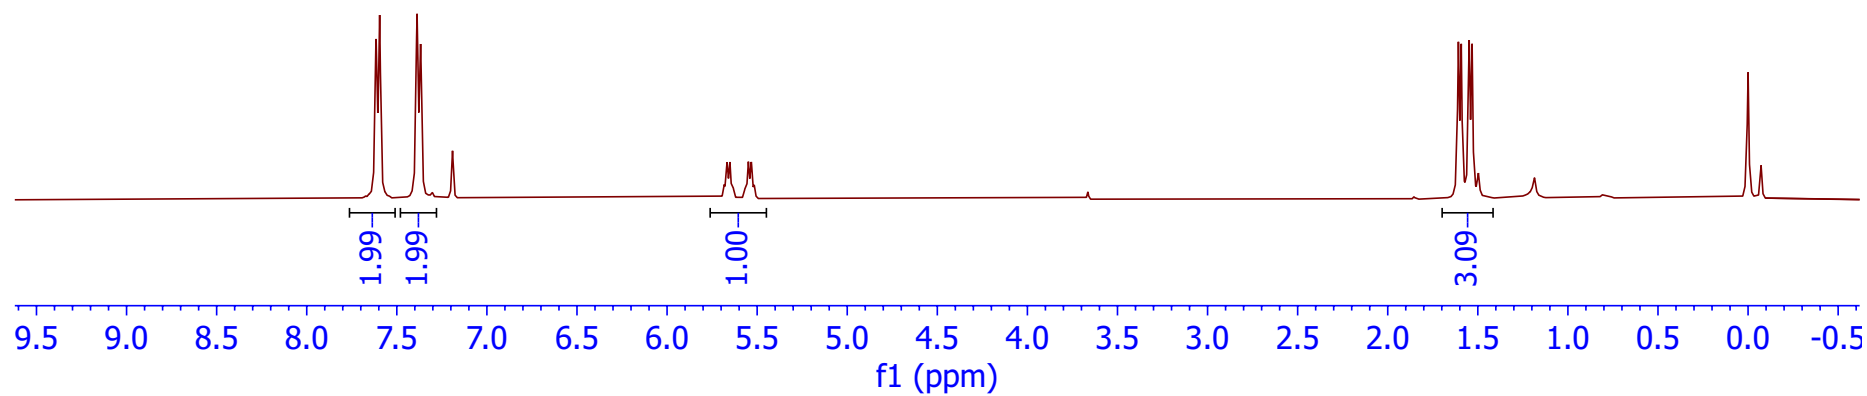

<sup>1</sup>H NMR of 14n

101 MHz, Chloroform-d



14n

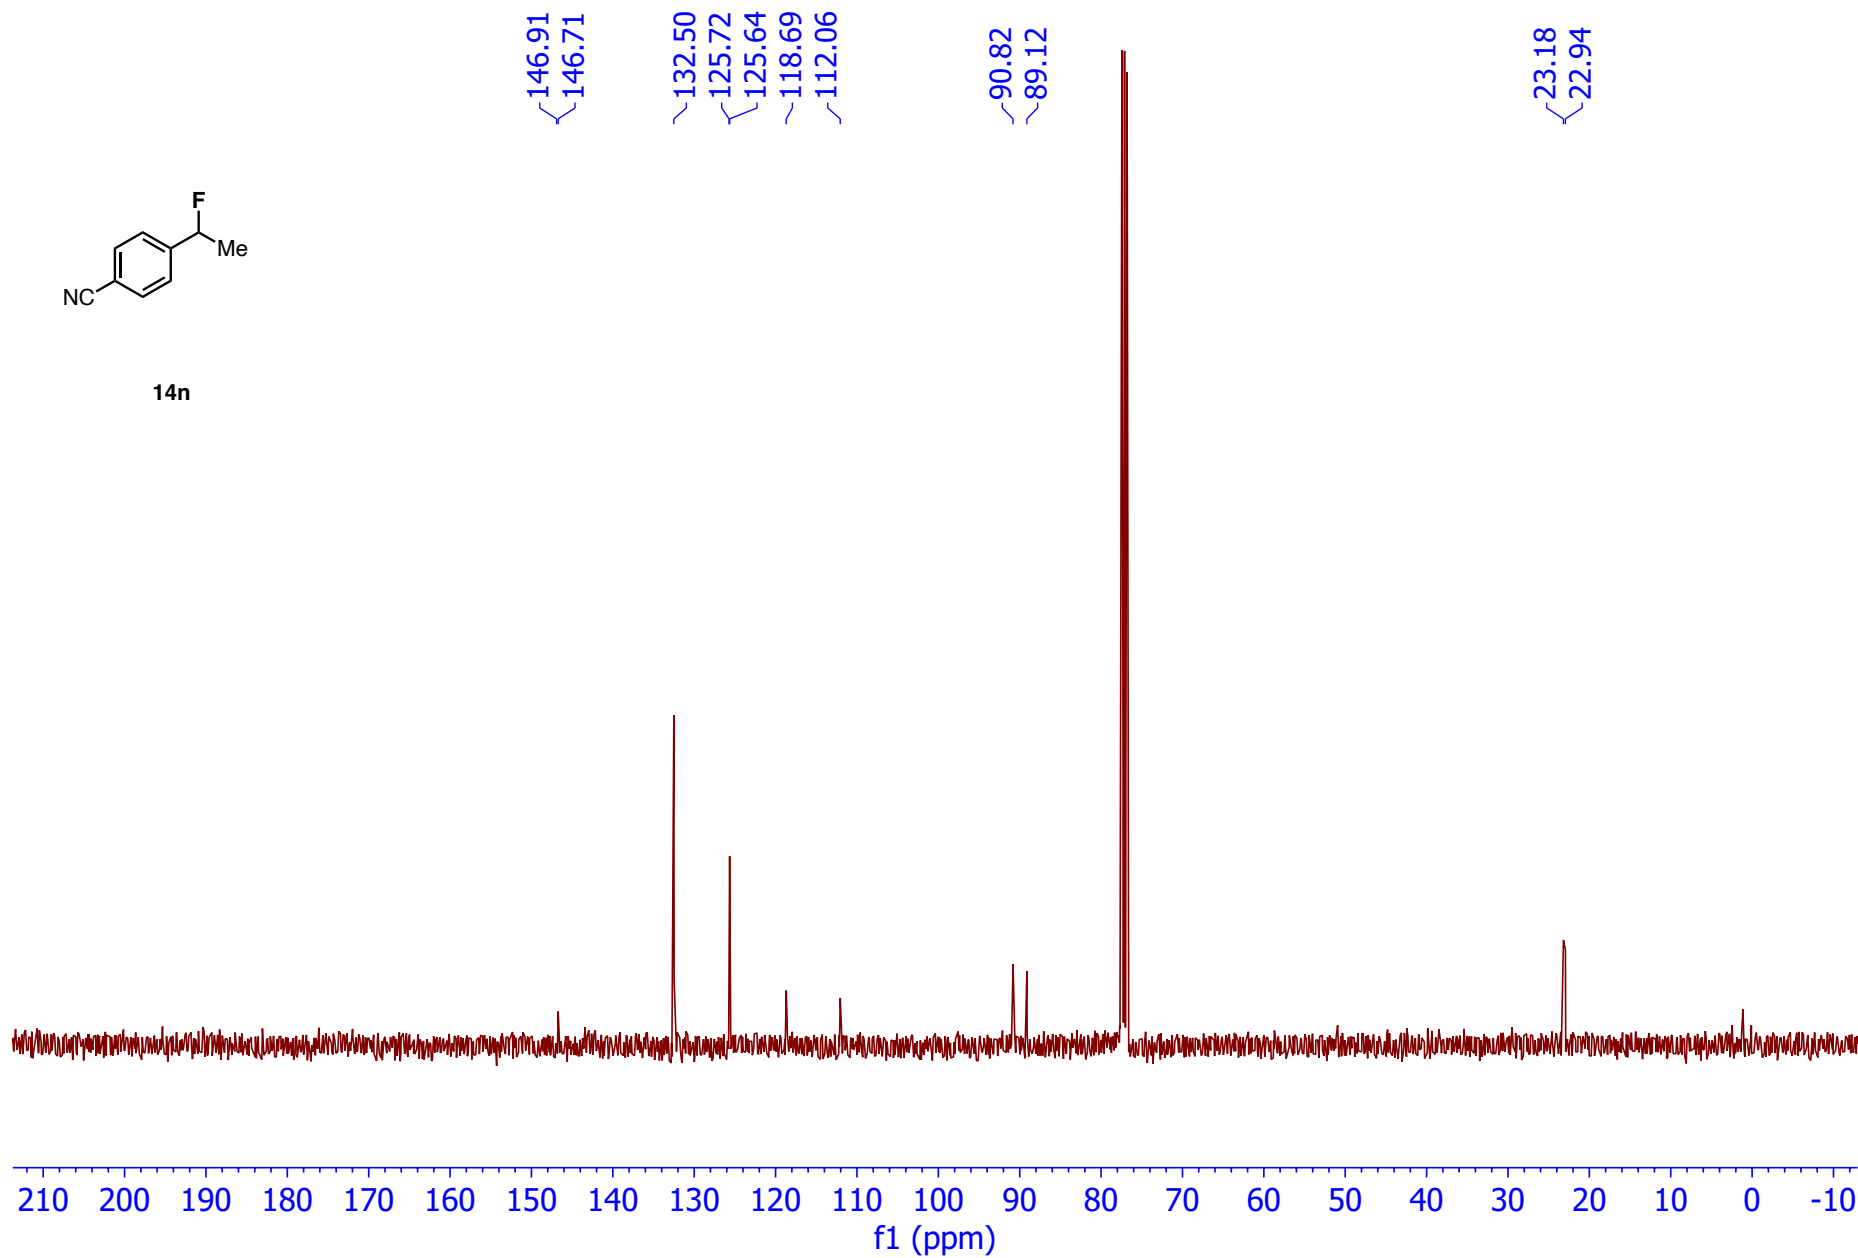

<sup>13</sup>C NMR of 14n

376MHz, Chloroform-d

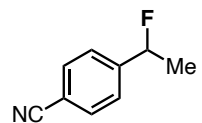

14n

-172.57  
-172.62  
-172.69  
-172.97

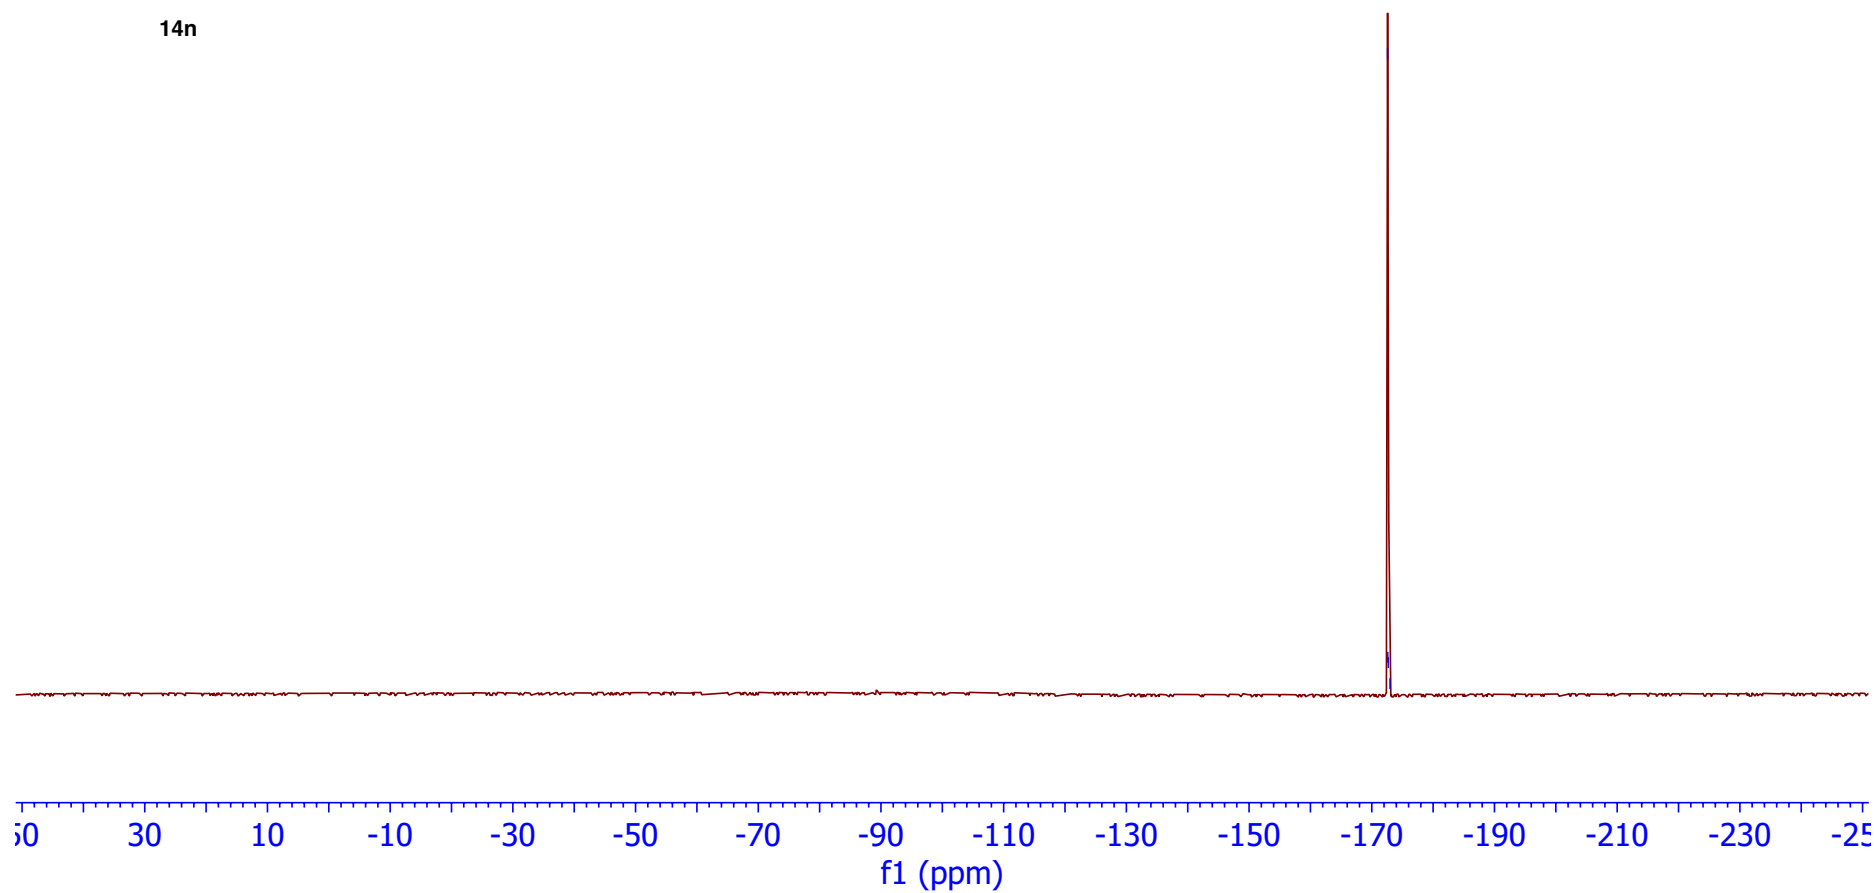

$^{19}\text{F}$  NMR of 14n

400 HMz, Chloroform-d

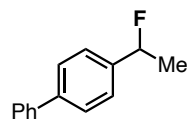

14o

7.62  
7.60  
7.60  
7.58  
7.46  
7.44  
7.42  
7.39  
7.38  
7.37  
7.35  
5.76  
5.75  
5.73  
5.71  
5.64  
5.63  
5.61  
5.60

1.72  
1.71  
1.66  
1.65

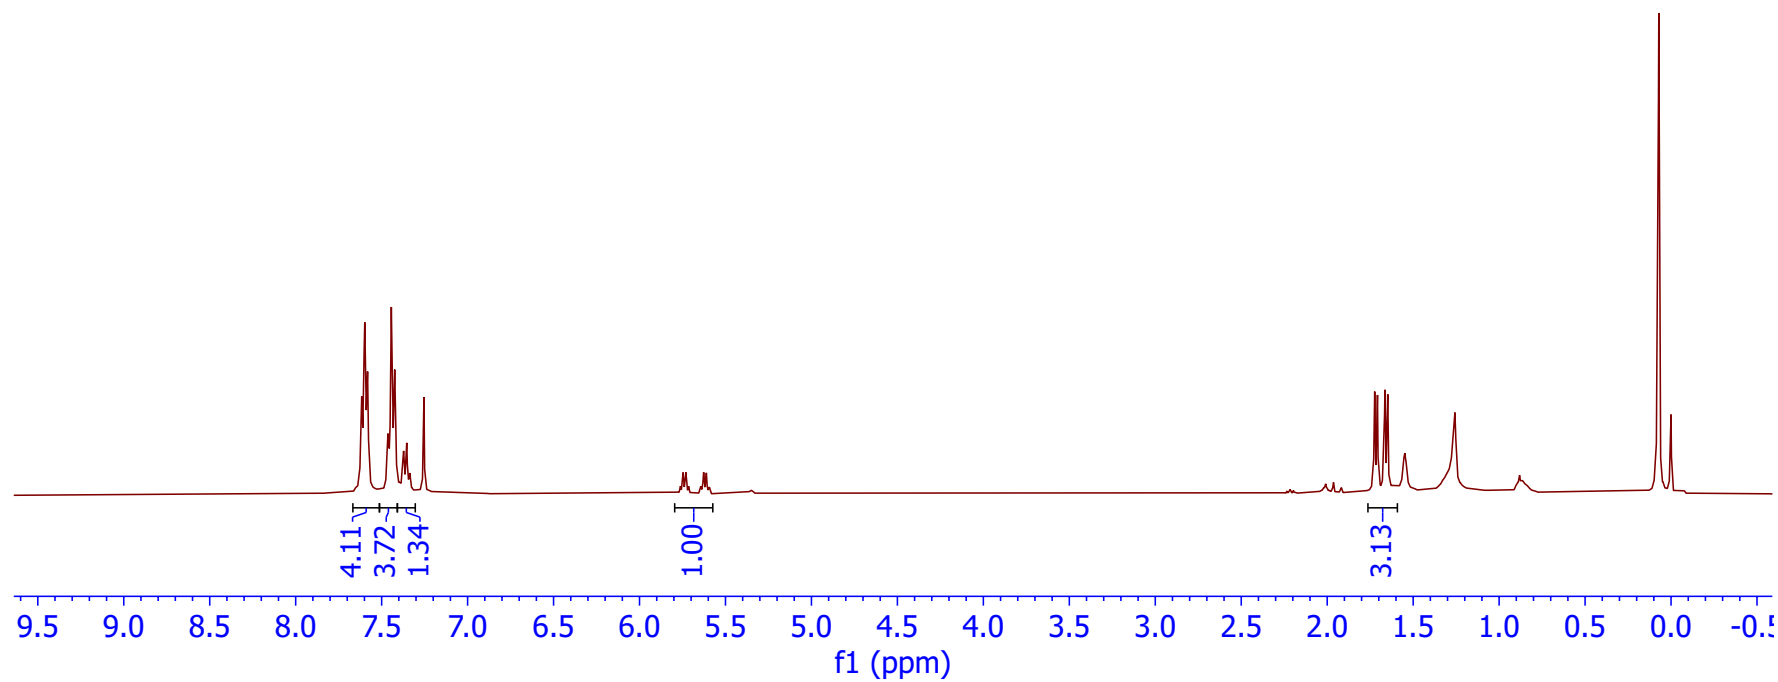

<sup>1</sup>H NMR of 14o



376MHz, Chloroform-d

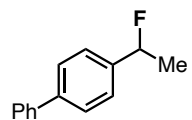

14o

---166.61

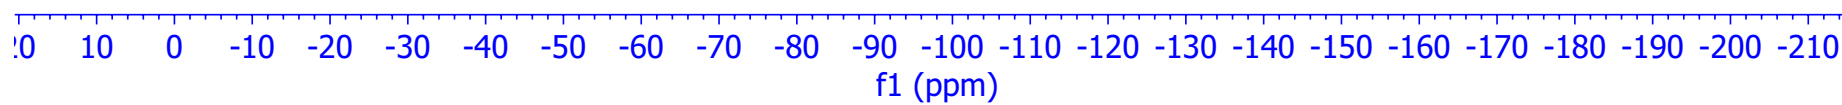

$^{19}\text{F}$  NMR of 14o

400 HMz, Chloroform-d

7.63  
7.61  
7.61  
7.60  
7.59  
7.59  
7.47  
7.46  
7.45  
7.44  
7.43  
7.43  
7.38  
7.38  
7.38  
7.37  
7.36  
7.36  
7.35  
7.34  
5.48  
5.36

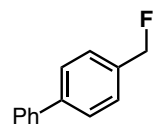

14p

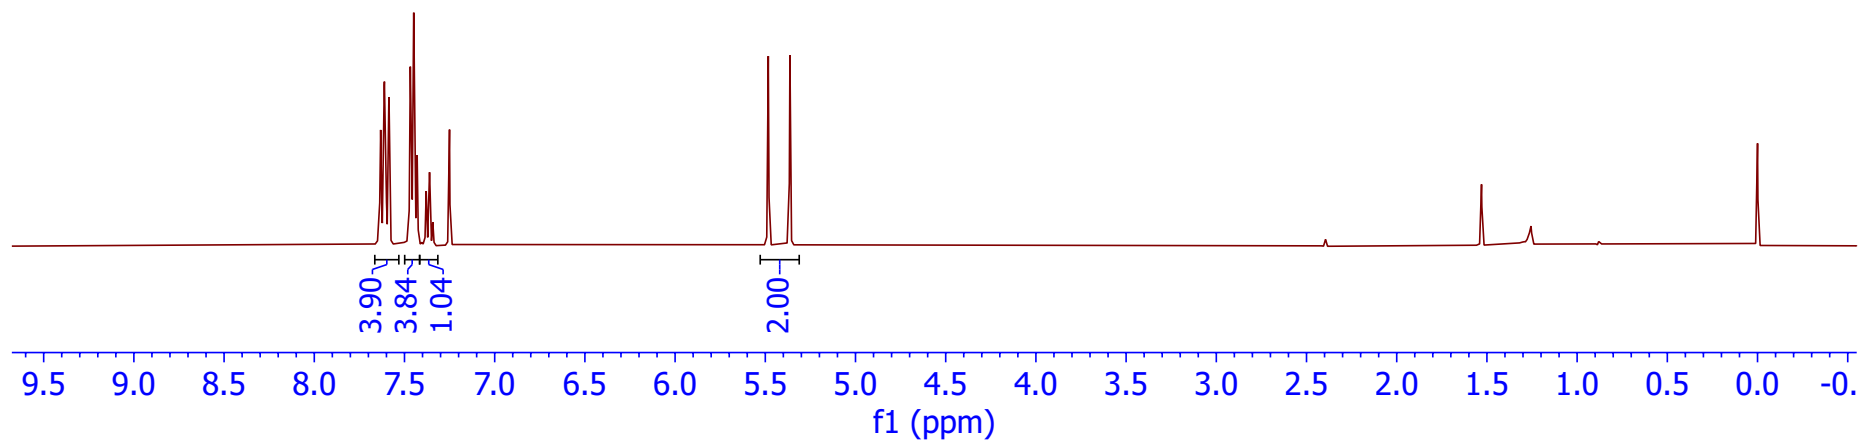

<sup>1</sup>H NMR of 14p

101 MHz, Chloroform-d

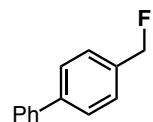

14p

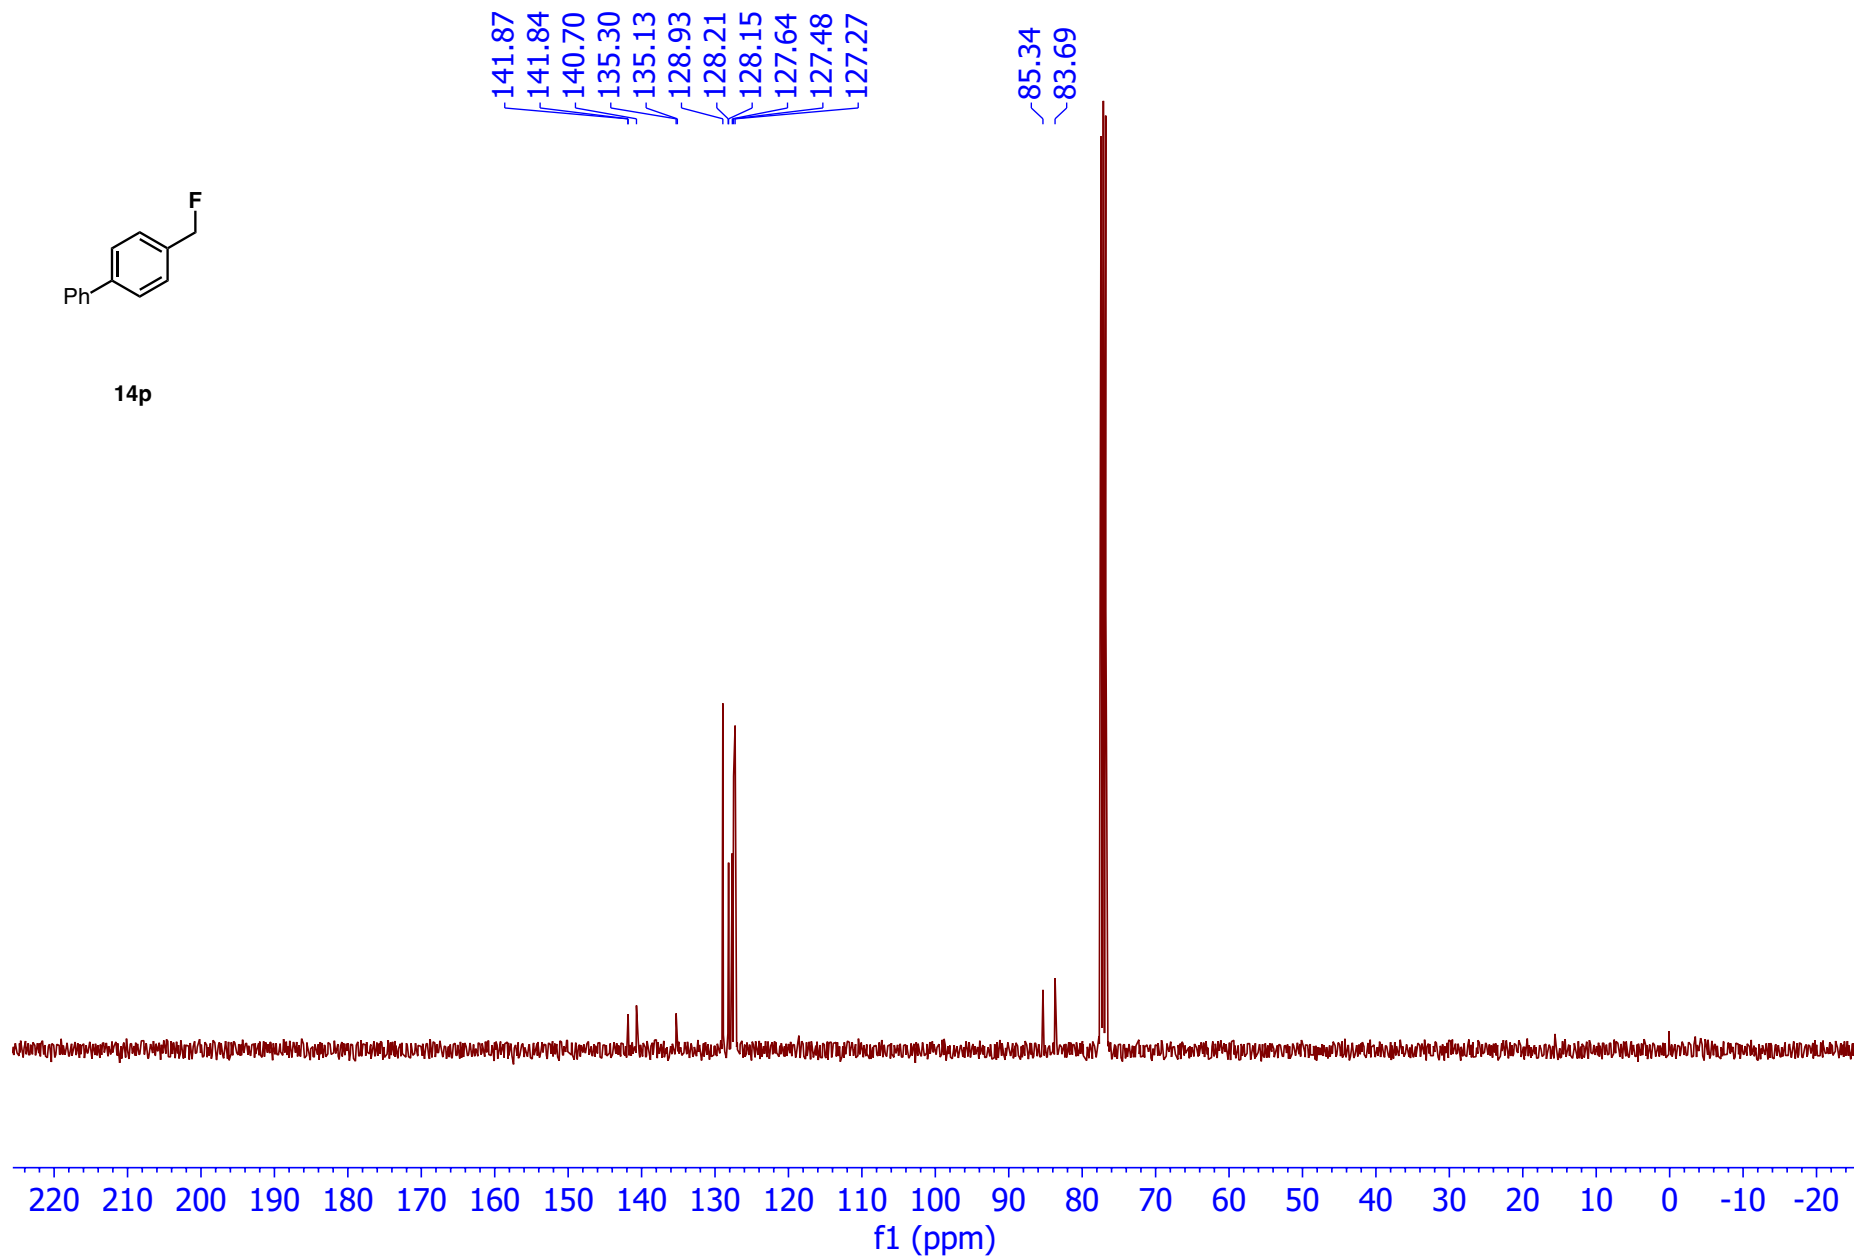

$^{13}\text{C}$  NMR of 14p

376MHz, Chloroform-d



14p

-206.02  
-206.04  
-206.22  
-206.23  
-206.24  
-206.42  
-206.43

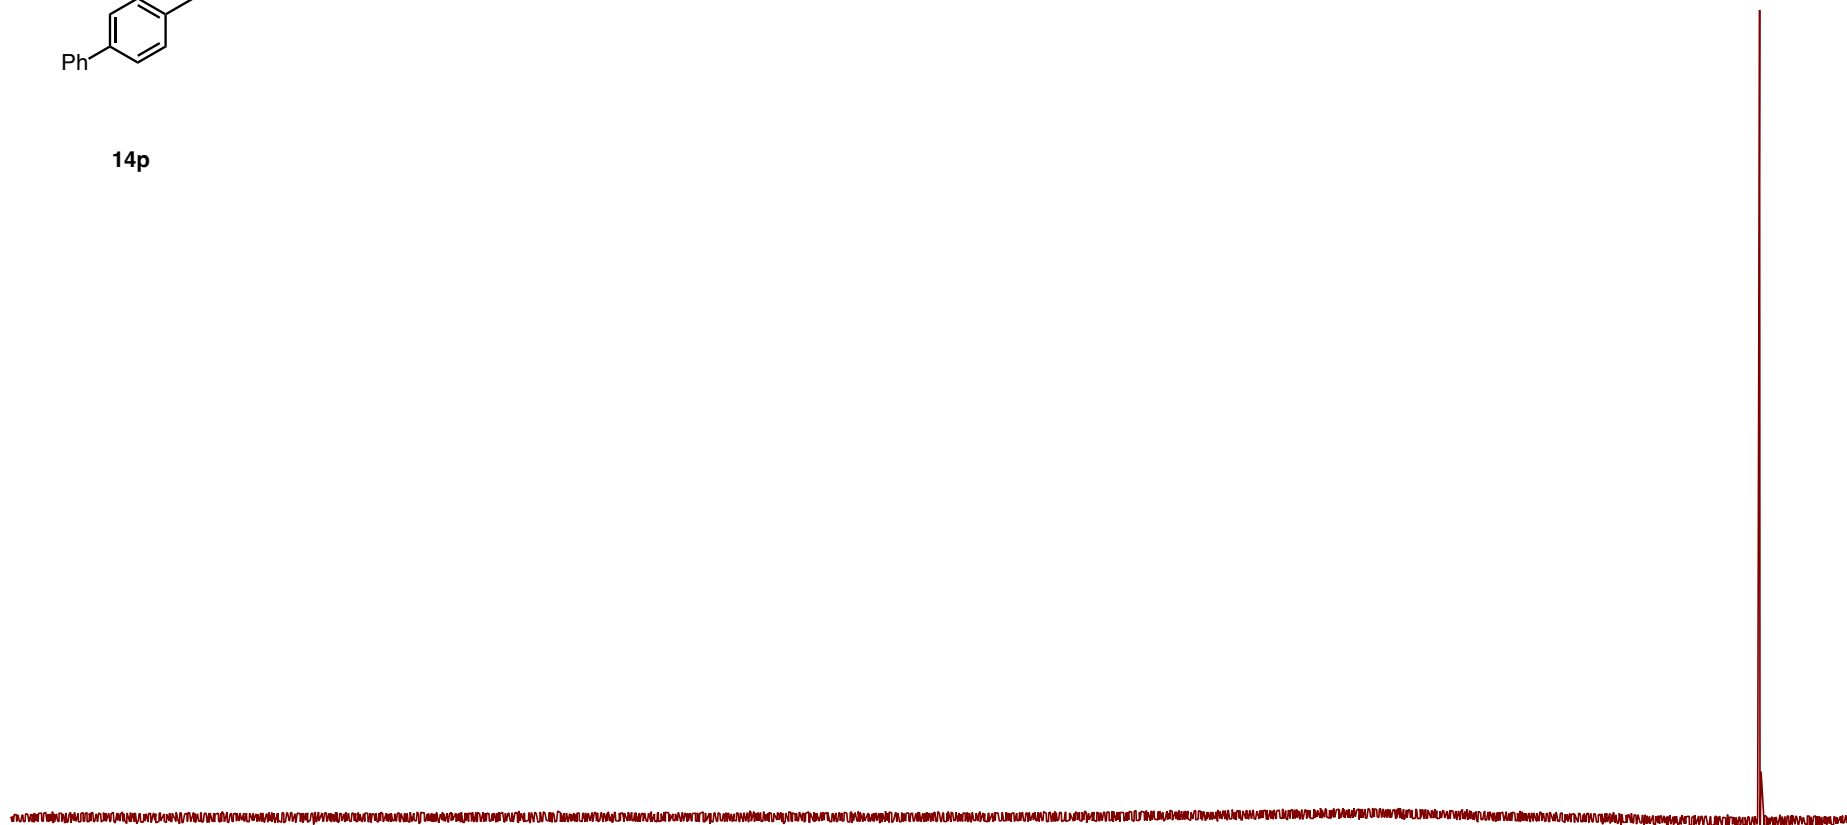

10 0 -10 -20 -30 -40 -50 -60 -70 -80 -90 -100 -110 -120 -130 -140 -150 -160 -170 -180 -190 -200 -210

f1 (ppm)

<sup>19</sup>F NMR of 14p

400 HMz, Chloroform-d

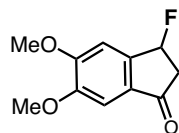

14q

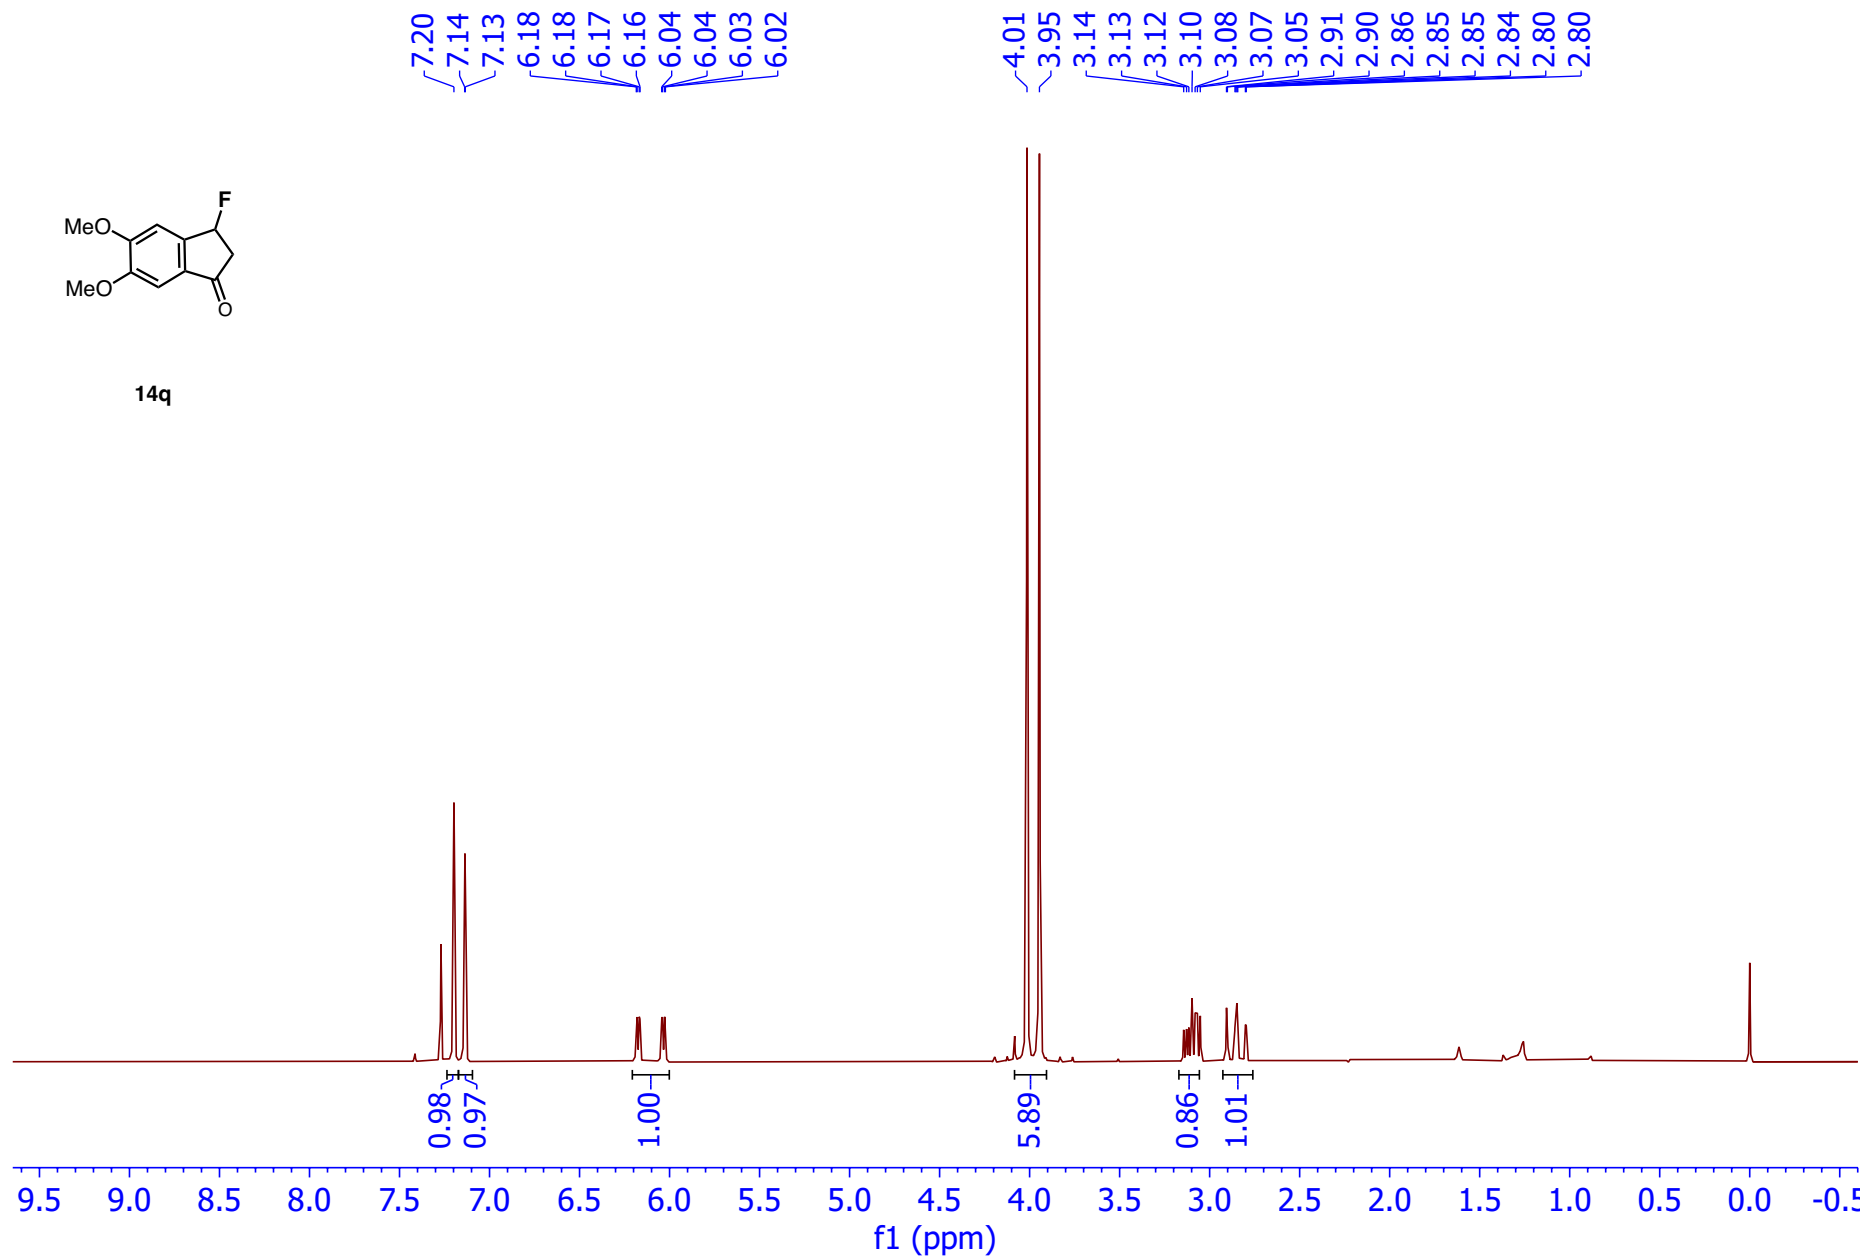

<sup>1</sup>H NMR of 14q

101 MHz, Chloroform-d

198.78

154.80  
154.77  
150.90  
144.32  
144.14

129.39  
129.37

106.12  
102.63

87.90  
86.14

55.44  
55.40  
55.27  
55.23  
43.23  
43.02

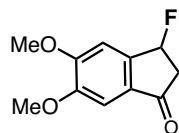

14q

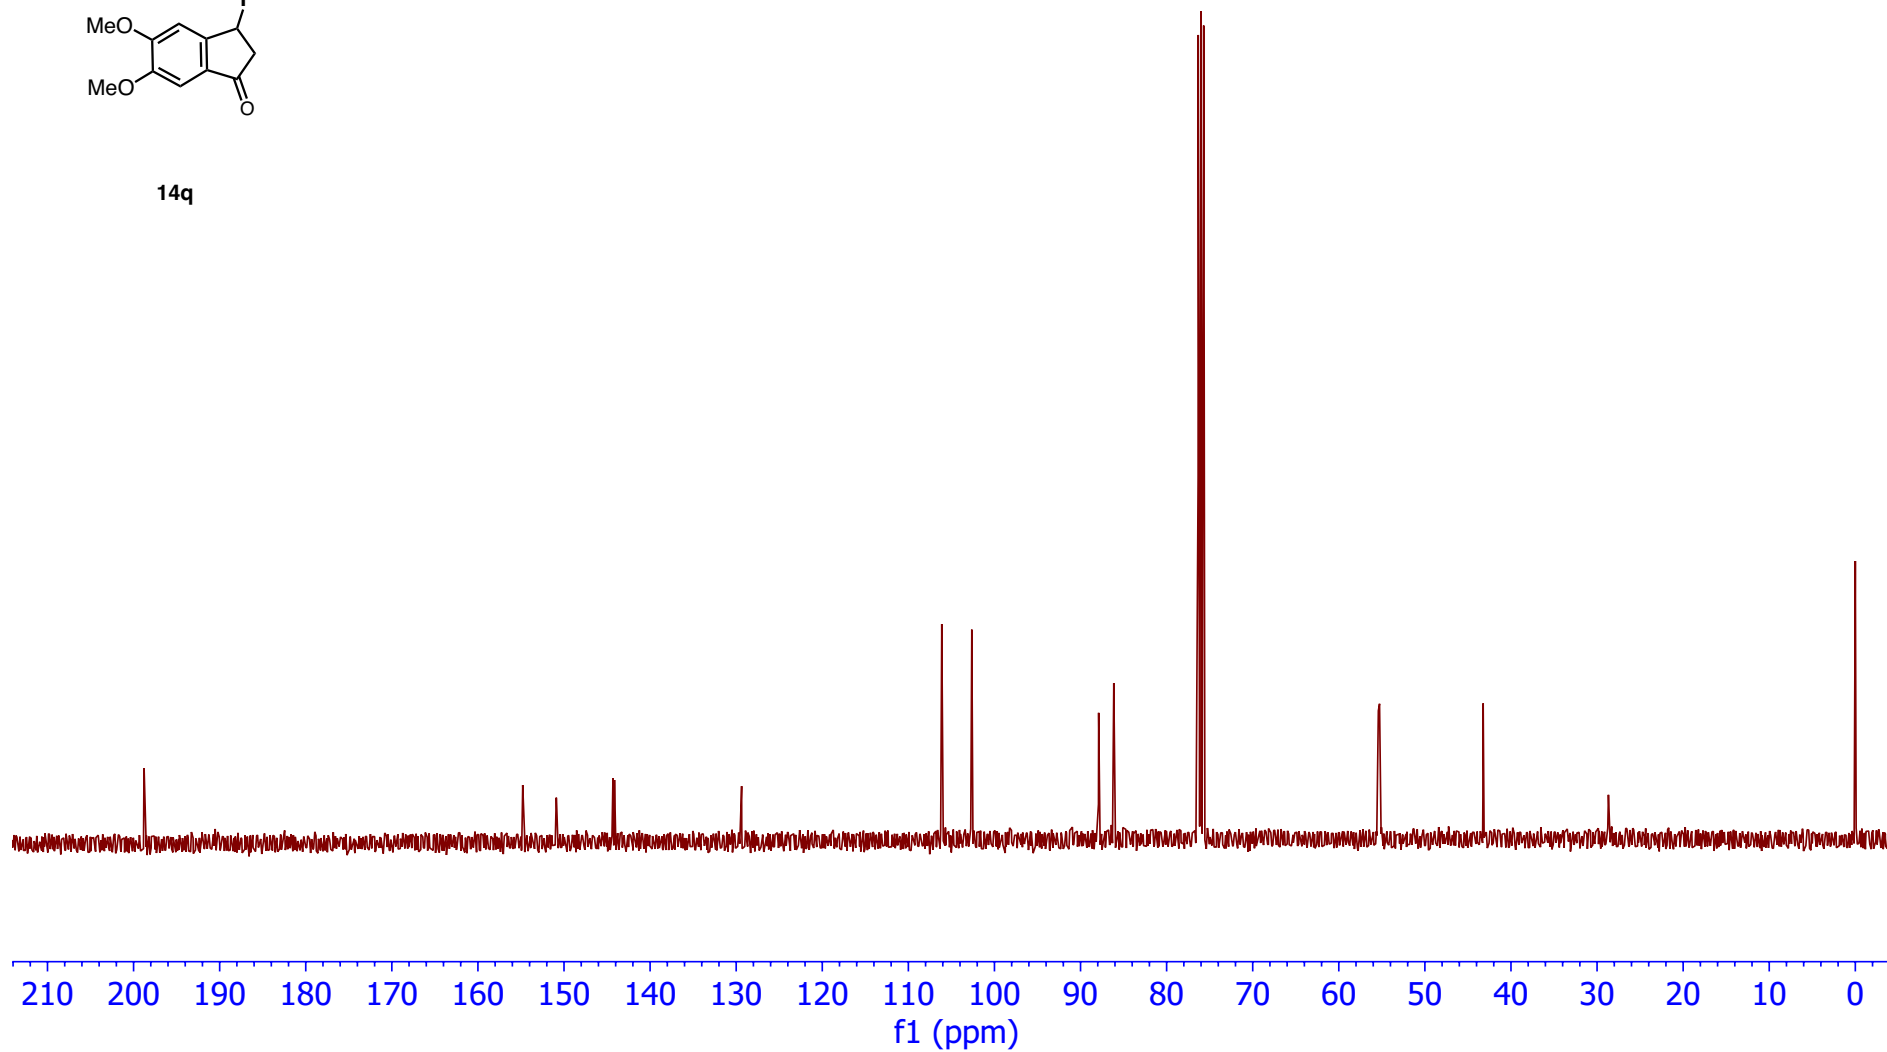

<sup>13</sup>C NMR of 14q

376MHz, Chloroform-d

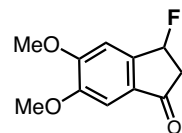

14q

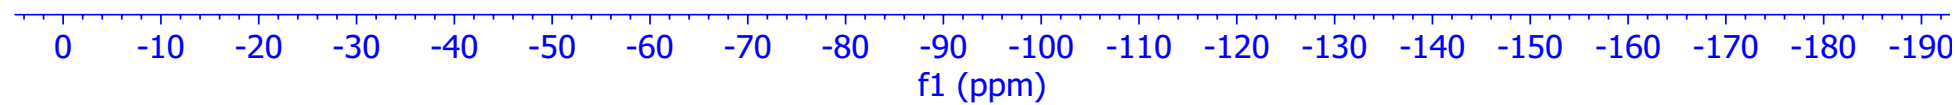

<sup>19</sup>F NMR of 14q

400 HMz, Chloroform-d

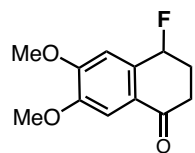

14r

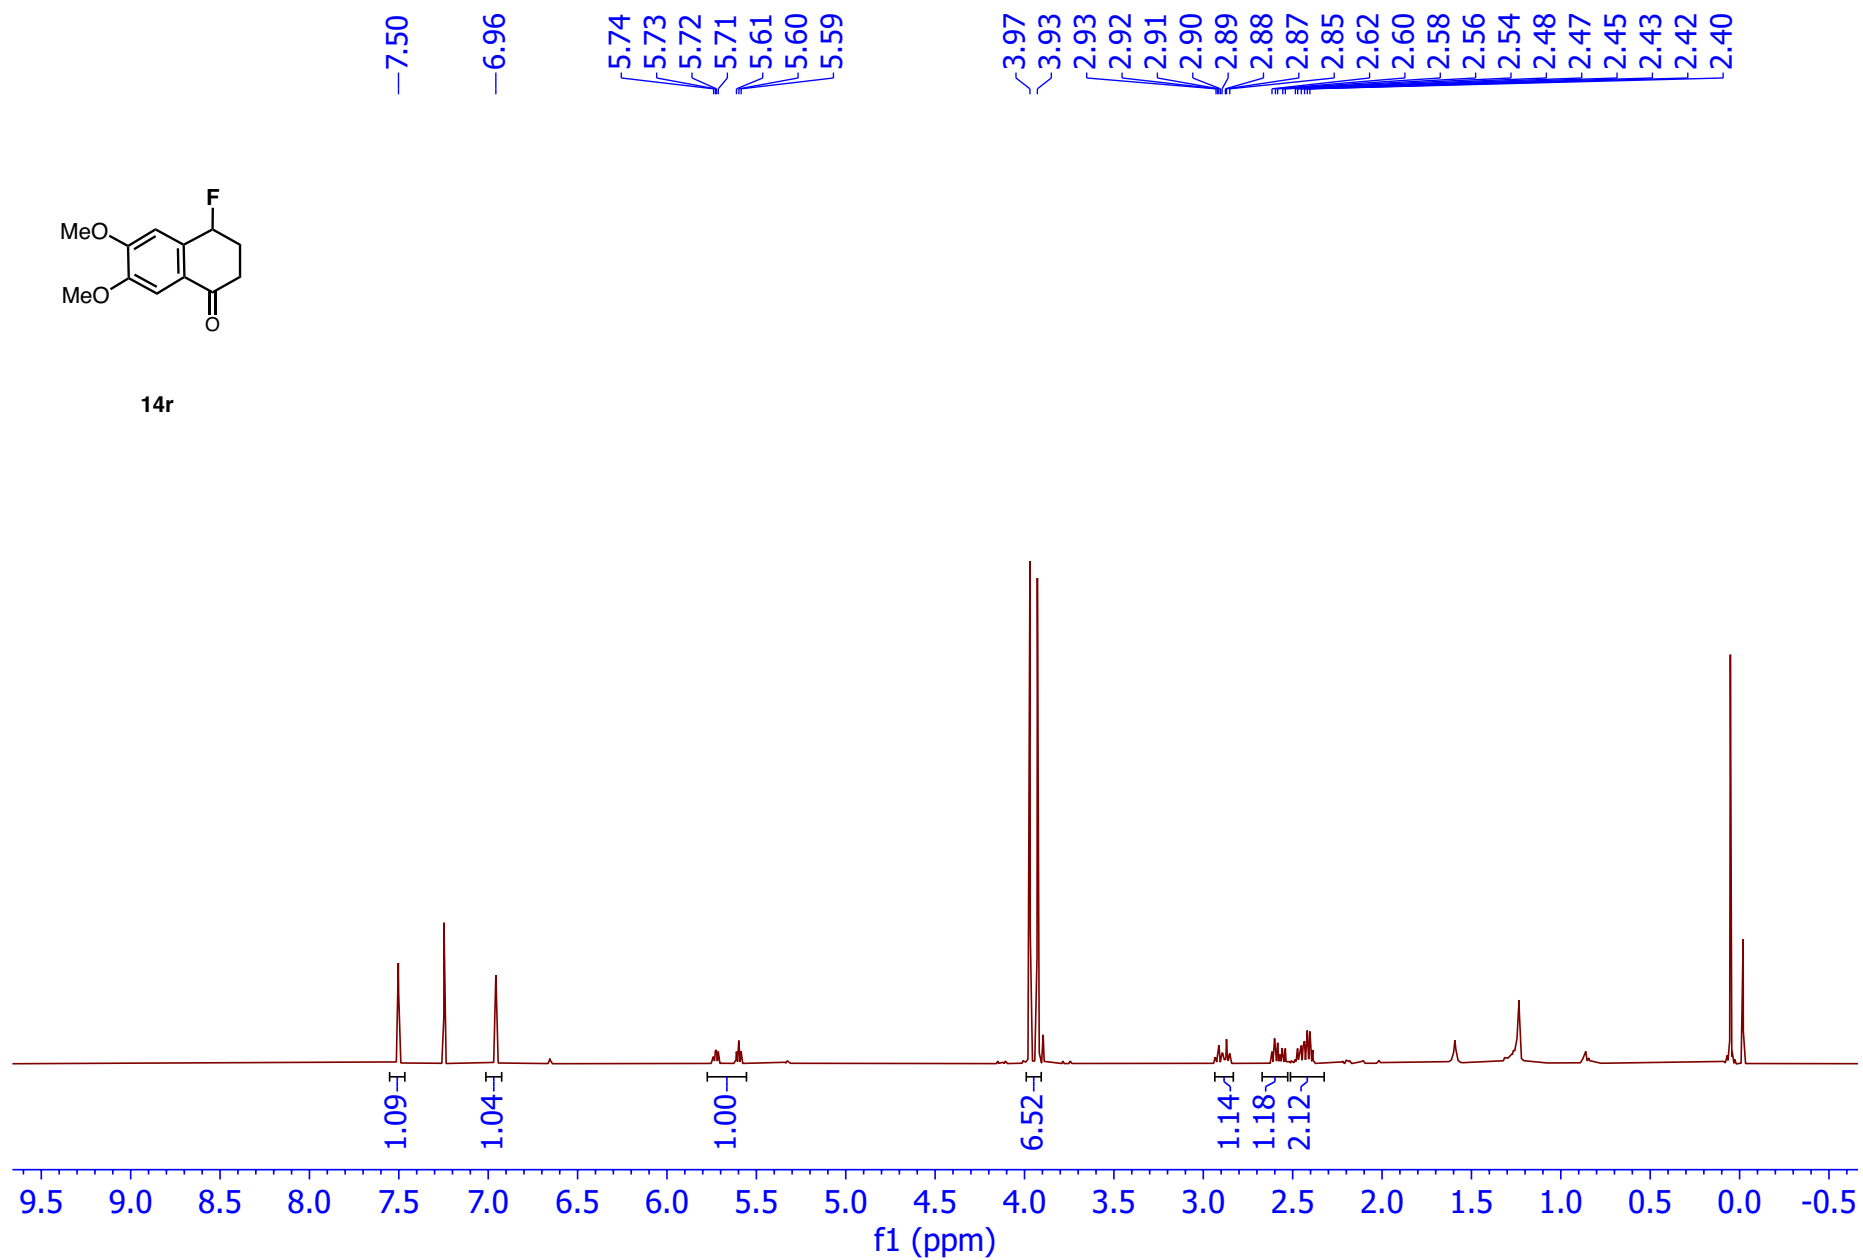

<sup>1</sup>H NMR of 14r



101 MHz, Chloroform-d

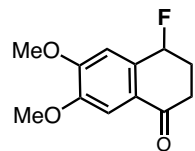

14r

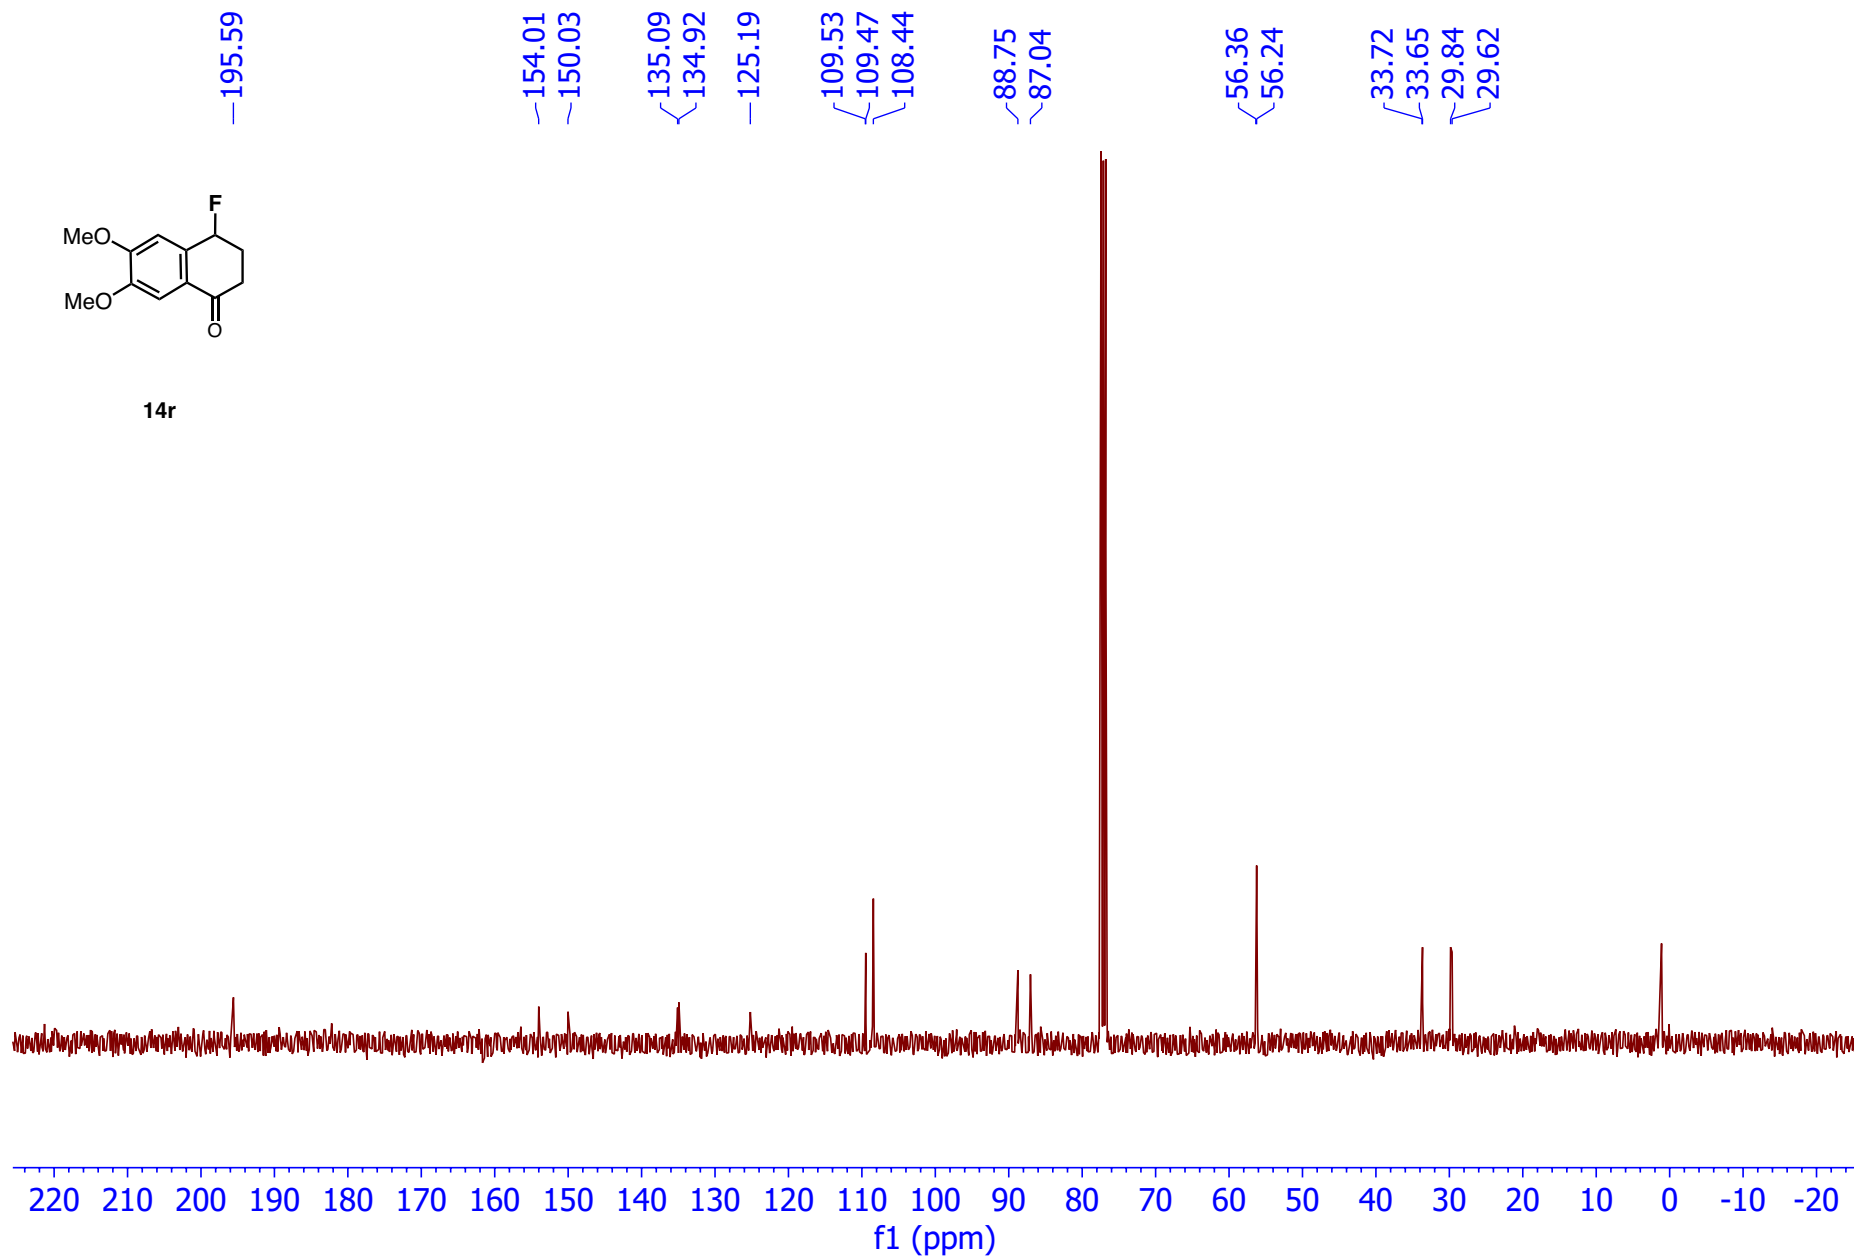

<sup>13</sup>C NMR of 14r

376MHz, Chloroform-d



14r

-169.33  
-169.34  
-169.38  
-169.42  
-169.46  
-169.52

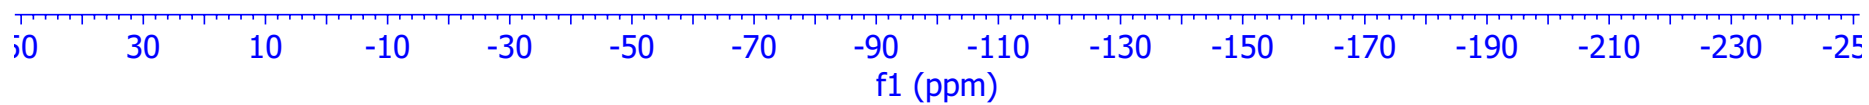

<sup>19</sup>F NMR of 14r

400 HMz, Chloroform-d

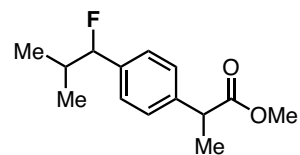

14s

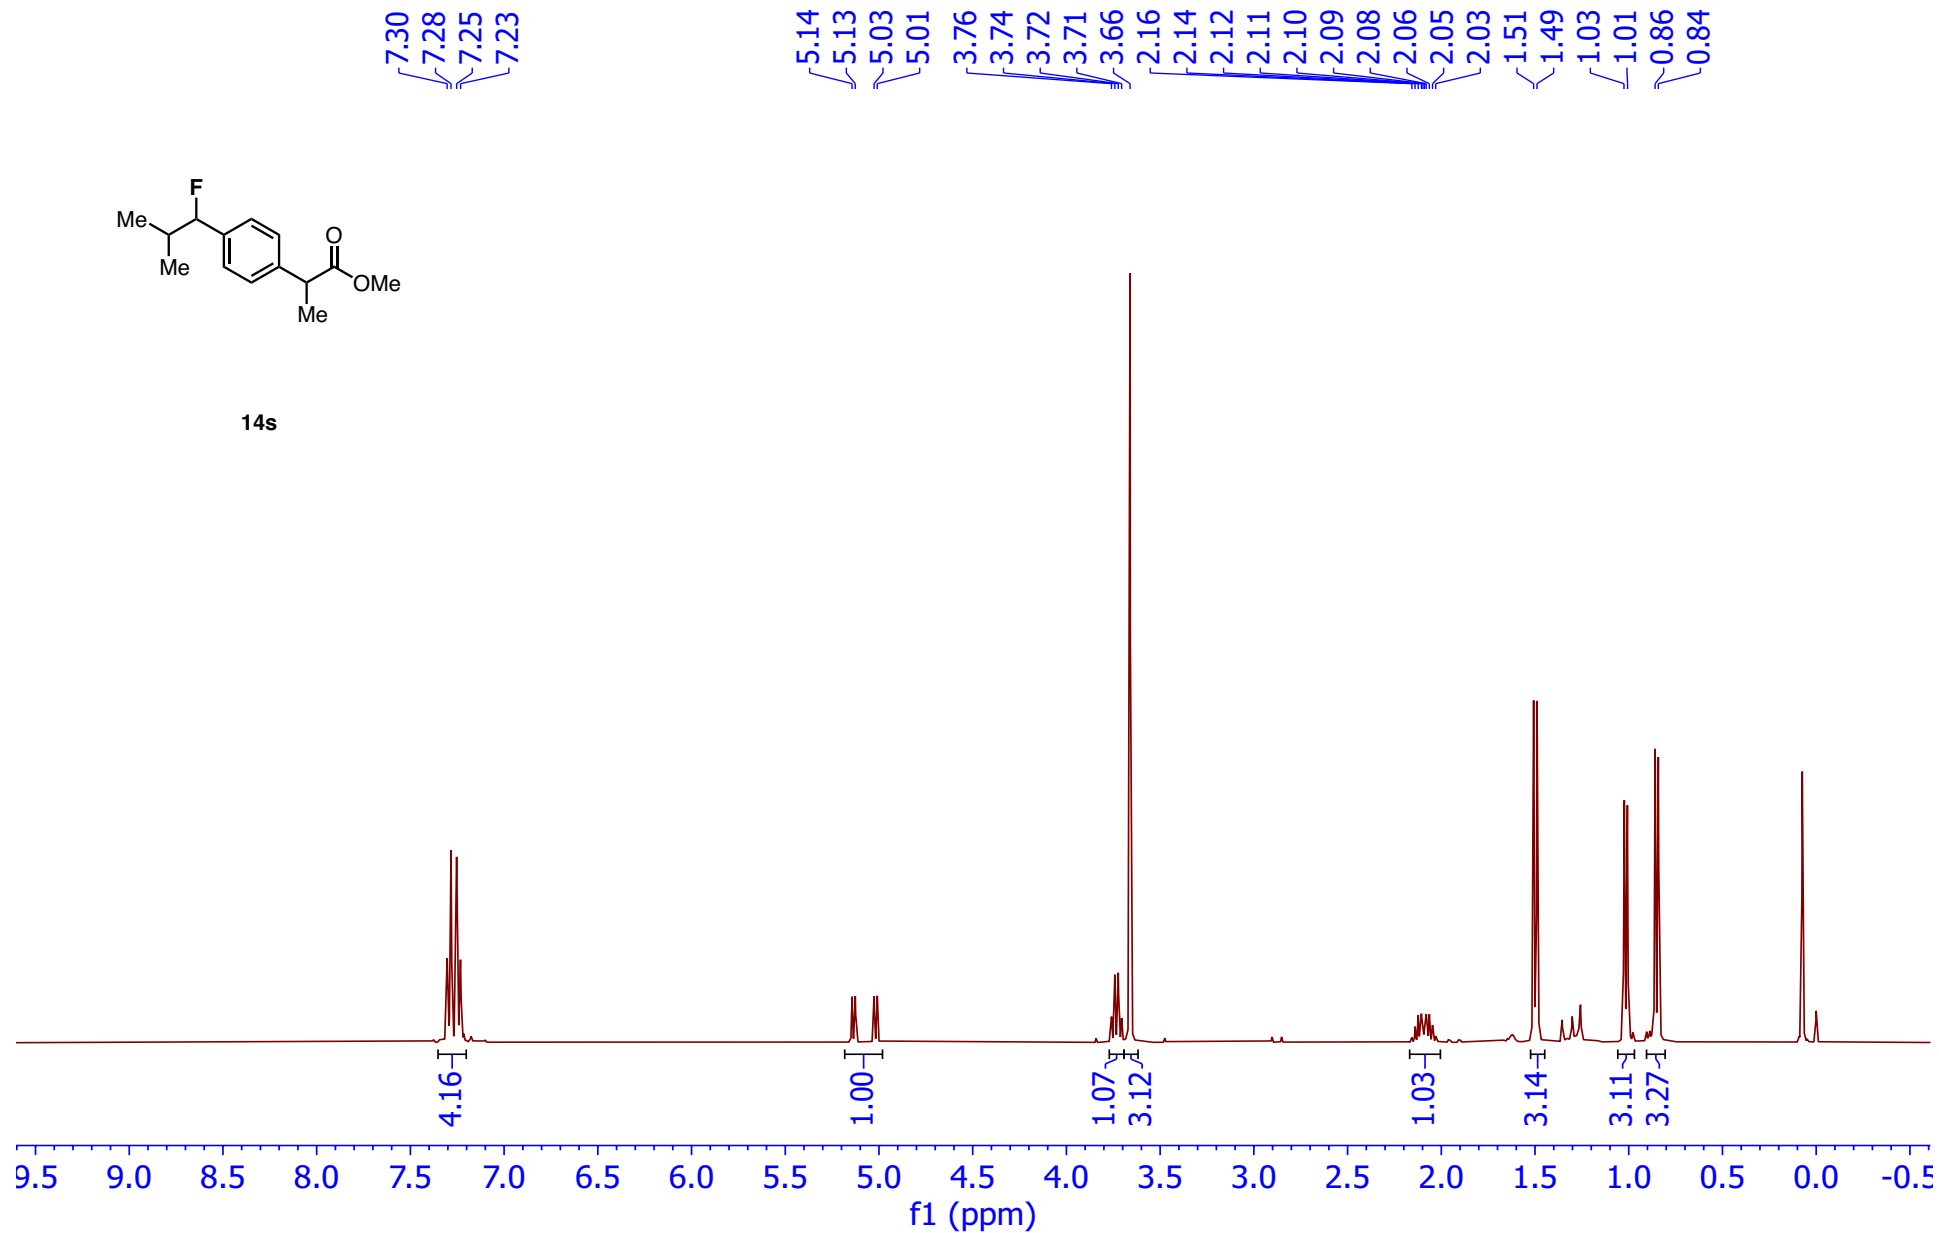

<sup>1</sup>H NMR of 14s

101 MHz, Chloroform-d

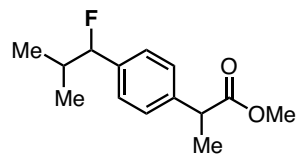

14s

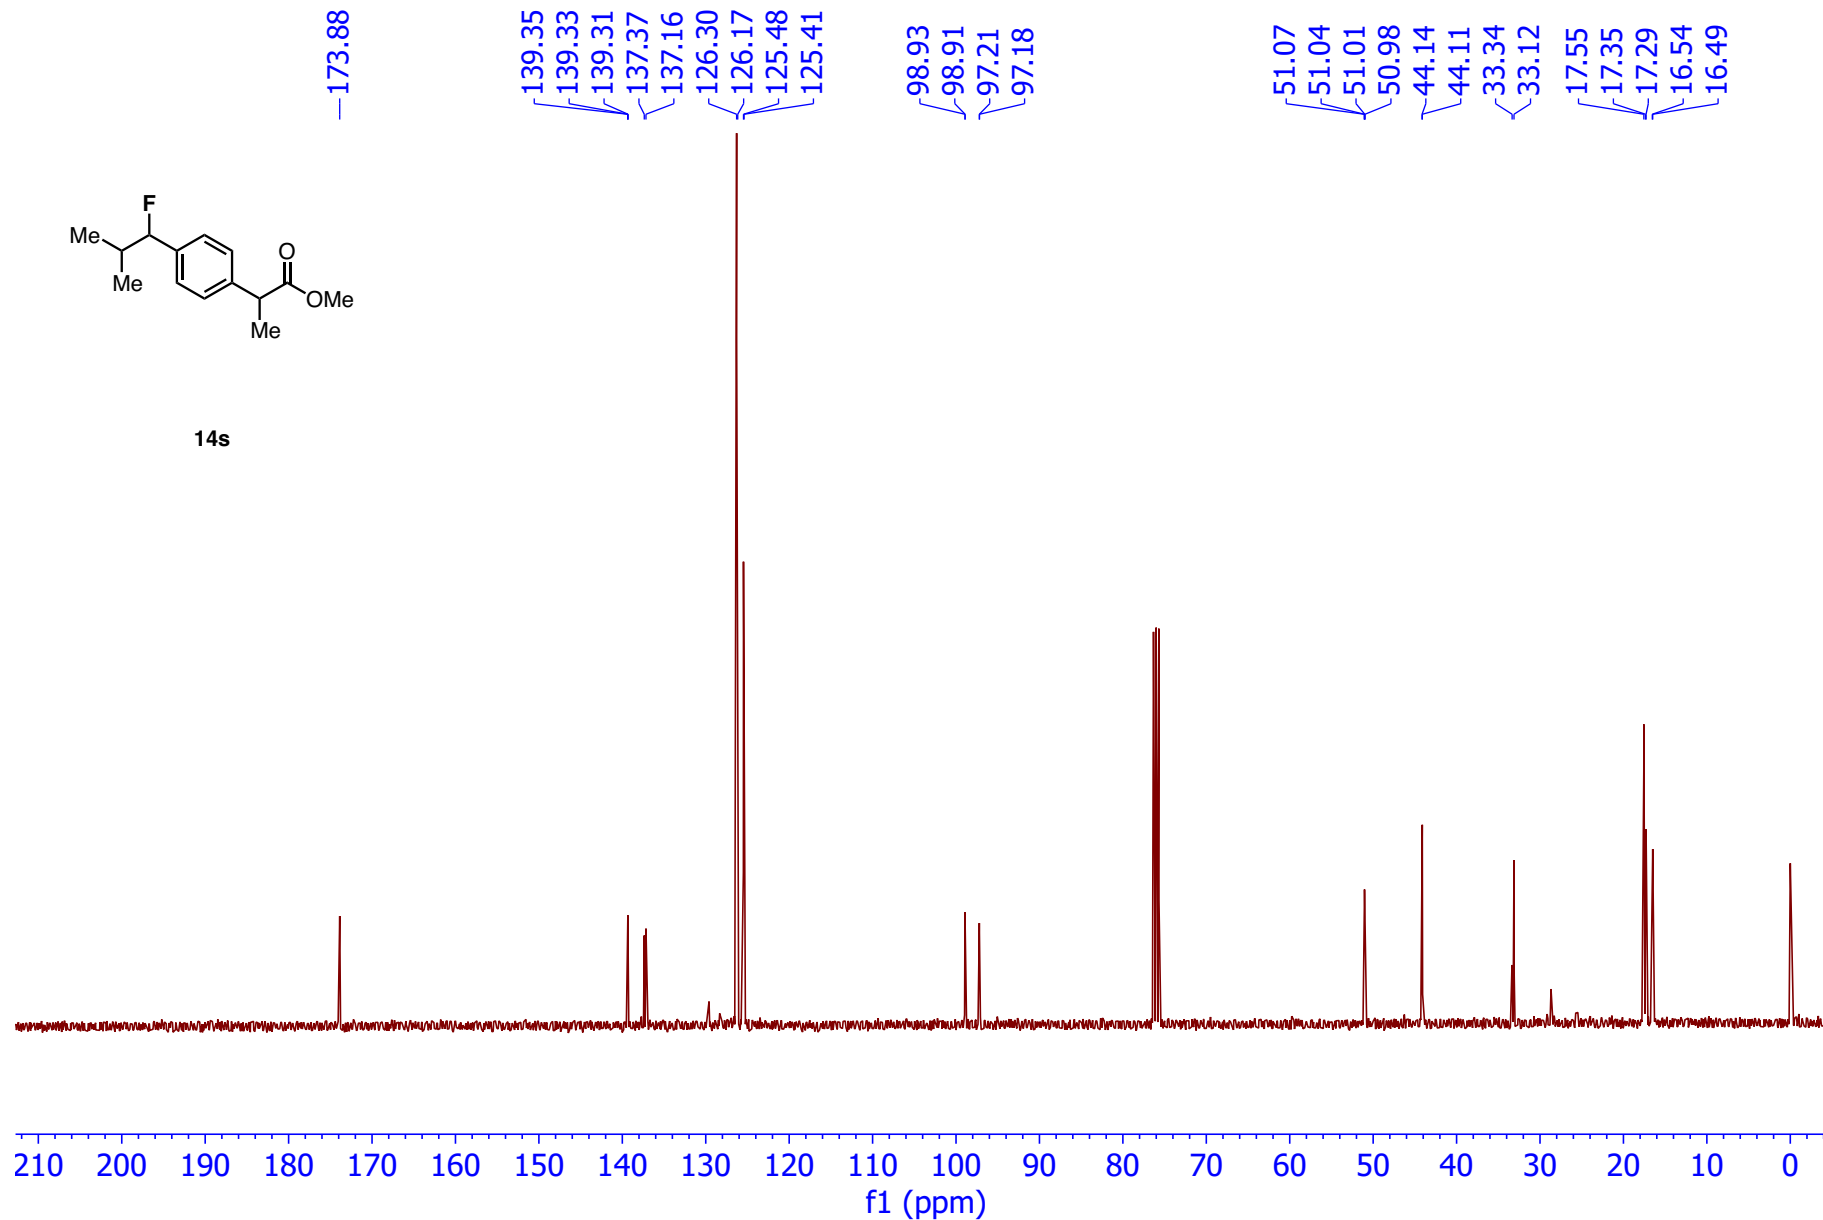

13C NMR of 14s

376MHz, Chloroform-d

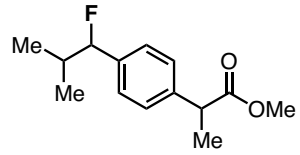

14s

-179.63  
-179.65

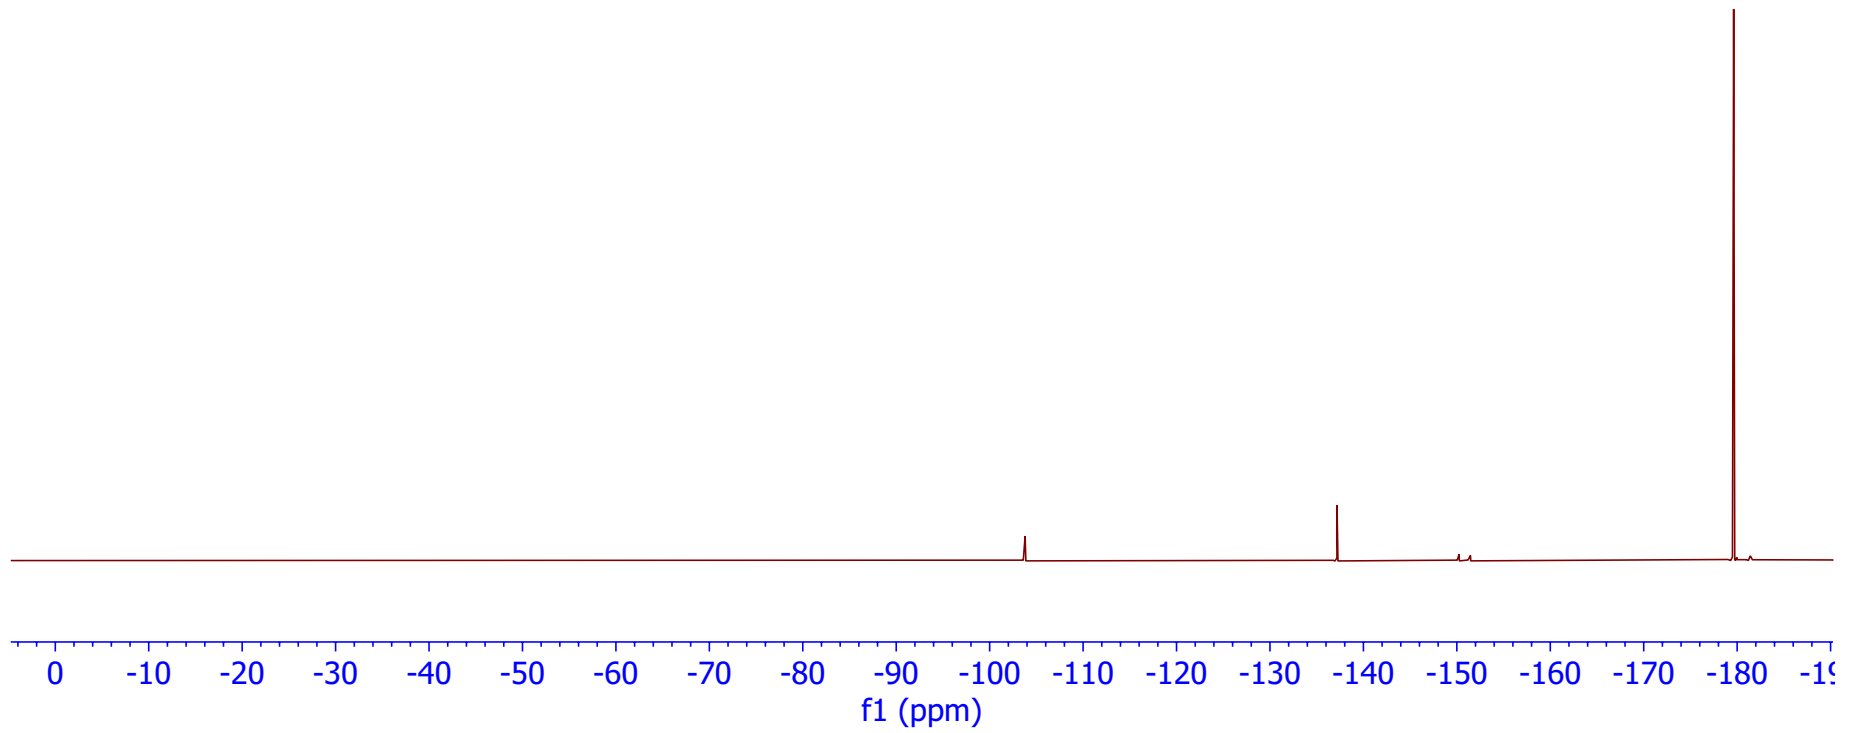

$^{19}\text{F}$  NMR of 14s

400 HMz, Chloroform-d

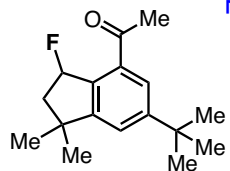

14t

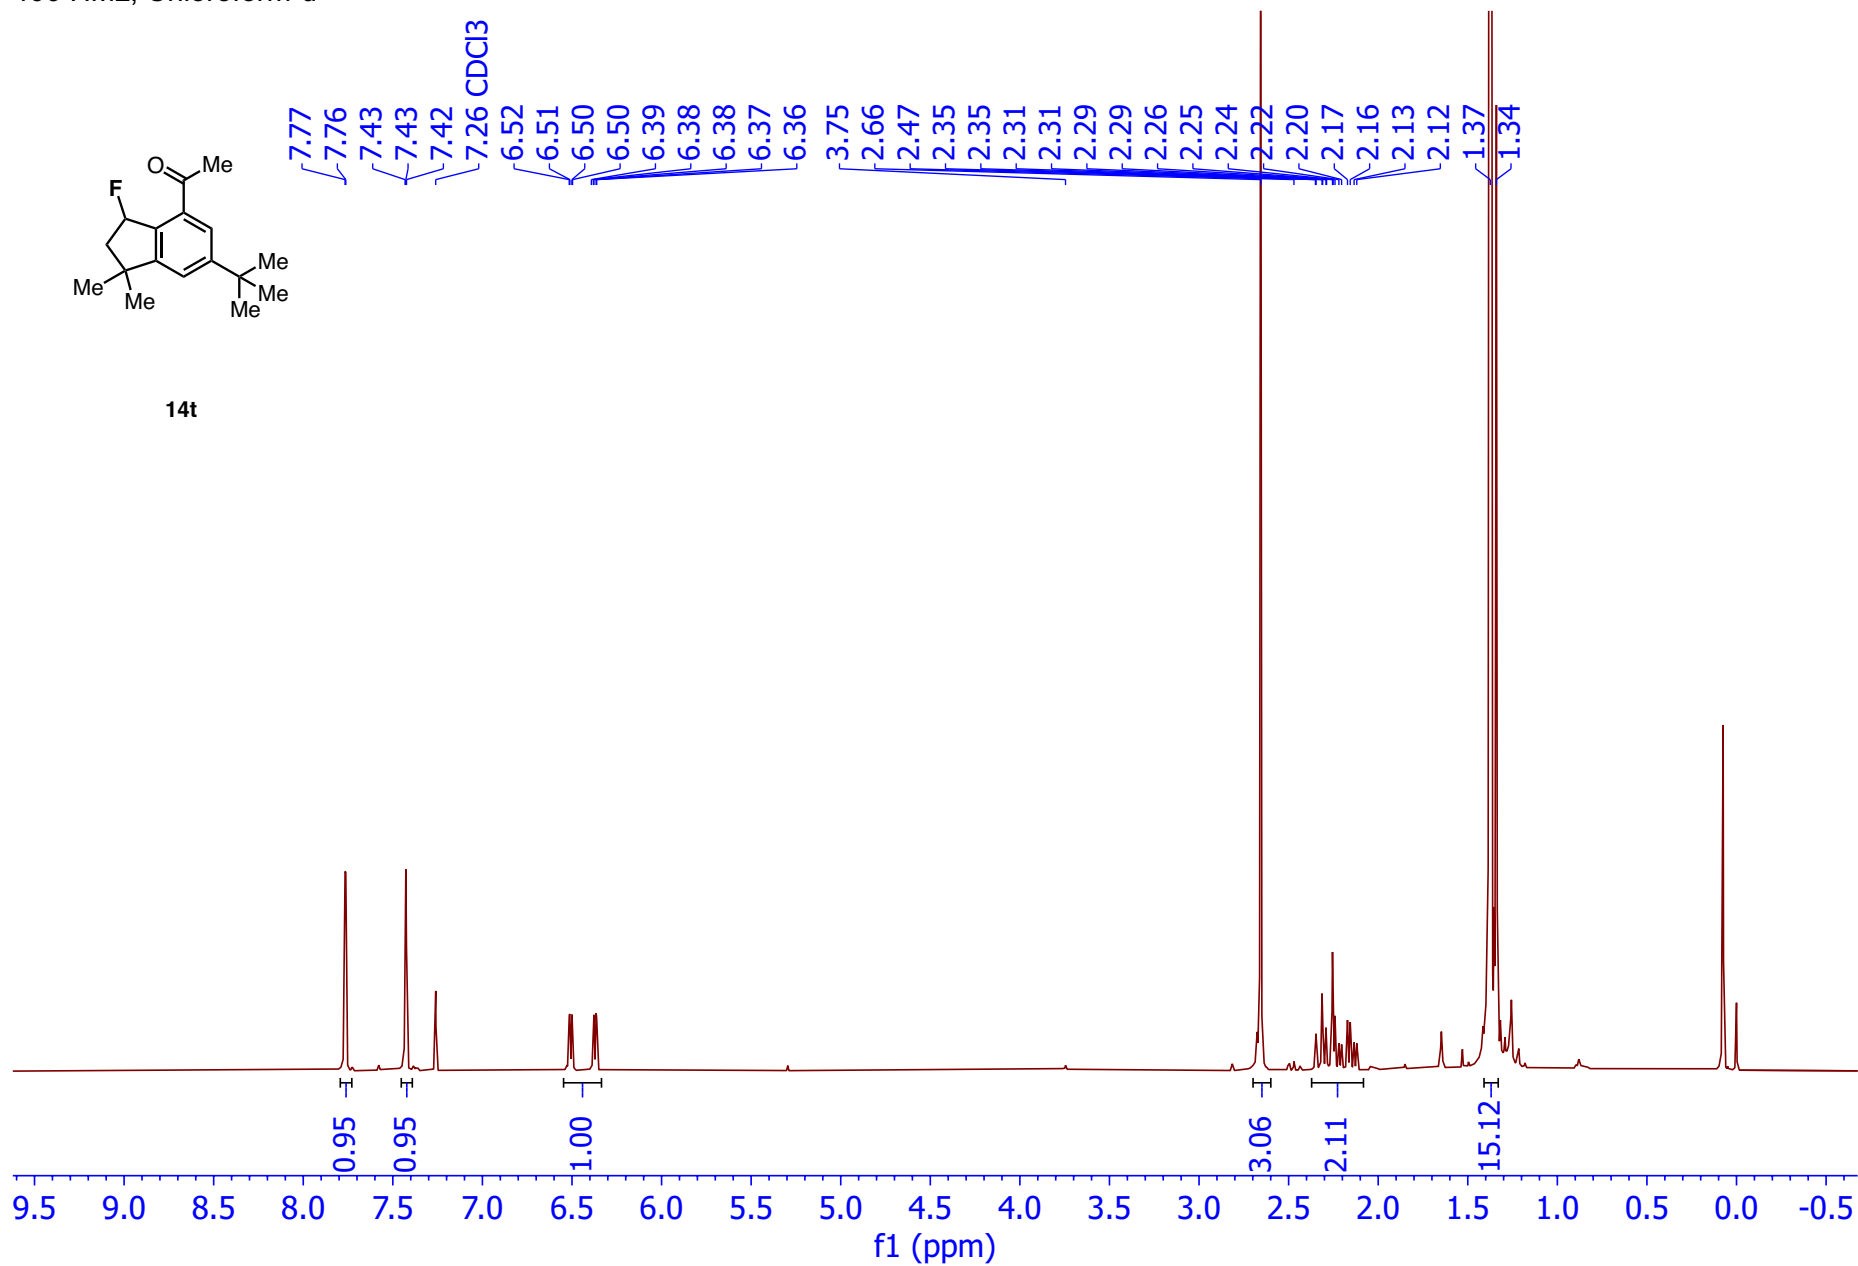

<sup>1</sup>H NMR of 14t

101 MHz, Chloroform-d

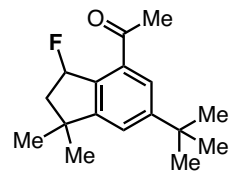

14t

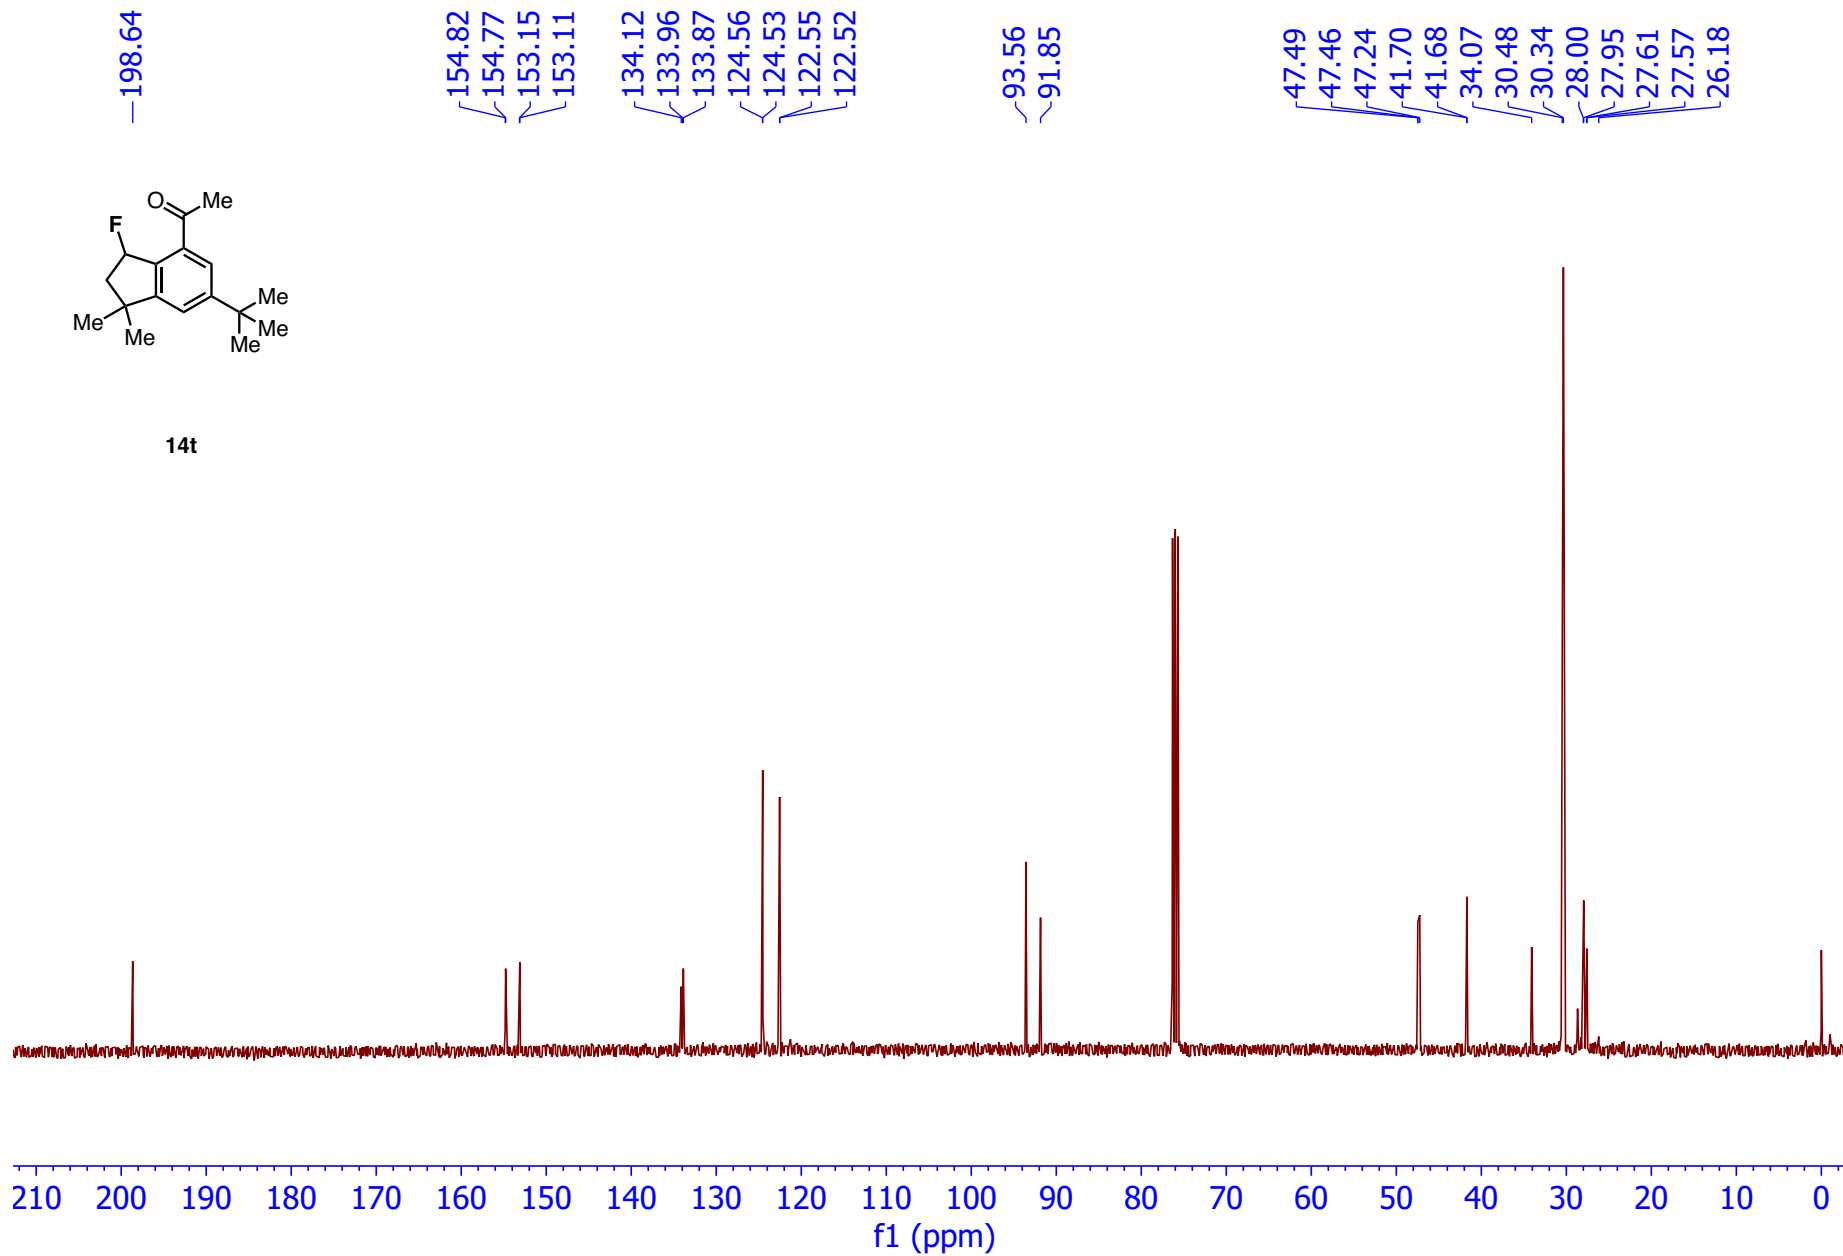

<sup>13</sup>C NMR of 14t

376MHz, Chloroform-d

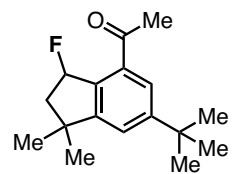

14t

--158.61

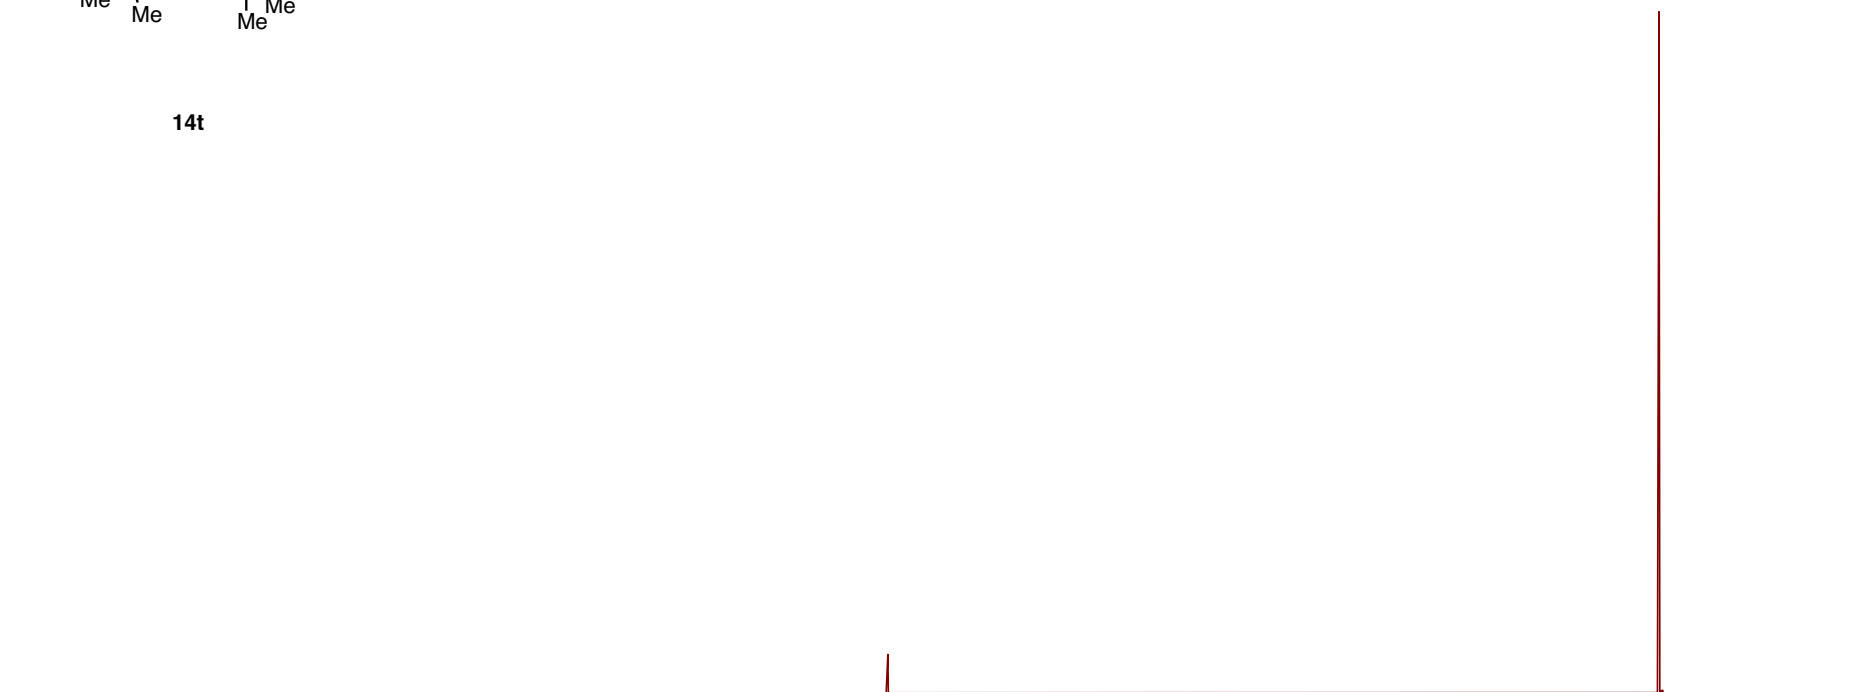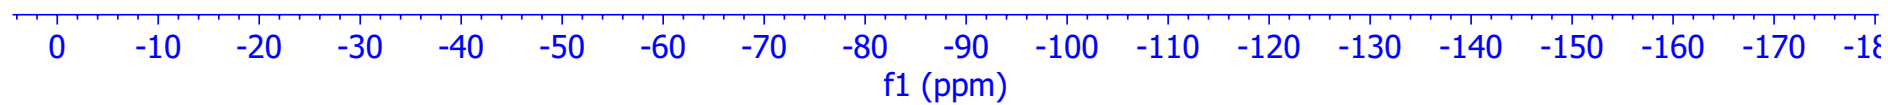

<sup>19</sup>F NMR of 14t
